# Supplementary material for: A new method to quantify particulate sodium and potassium salts (nitrate, chloride, and sulfate) by thermal desorption aerosol mass spectrometry
Source: Copernicus journal article supplement (doi:10.5194/amt-2021-228), 2021-08-26
Supplement: Supplementary file 1 [file amt-2021-228-supplement.zip]

Archive with 7 entries (7 files):
- Fig 3.csv
- Fig 4.csv
- Fig 5.csv
- Fig 6.csv
- Data description 210721.pdf
- Kobayashi_AMT_Supplement_210727.pdf
- Fig 2.csv
