# Supplementary material for: A new method to quantify particulate sodium and potassium salts (nitrate, chloride, and sulfate) by thermal desorption aerosol mass spectrometry
Source: Copernicus journal article supplement (doi:10.5194/amt-2021-228), 2021-08-26
Supplement: Supplementary file 1 [file amt-2021-228-supplement.zip › Data description 210721.pdf]

# **Data for the manuscript: “A new method to quantify particulate sodium and potassium salts (nitrate, chloride, and sulfate) by thermal desorption aerosol mass spectrometry”**

Yuya Kobayashi                      Tokyo Metropolitan University  
Nobuyuki Takegawa                Tokyo Metropolitan University

## **1. General**

Laboratory experiments were performed to test the sensitivities of the refractory aerosol thermal desorption mass spectrometer (rTDMS) to various types of particles. The main test particles included single-component sodium nitrate (SN), sodium chloride (SC), sodium sulfate (SS), potassium nitrate (PN), potassium chloride (PC), and potassium sulfate (PS) particles, internally mixed multi-component SN/SC/SS and PN/PC/PS particles with a molar ratio of 1:1:1, and laboratory-generated sea salt particles. The particle generation system included a Collison atomizer (Model 3076, TSI, Inc.) and a differential mobility analyzer (DMA; Model 3080, TSI, Inc.). A condensation particle counter (CPC; Model 3022A, TSI, Inc.) and the rTDMS were connected downstream of the particle generation system. We set the mobility diameter at 200 nm to generate monodisperse particles. The data used for Figs. 2–6 in the main document are provided.

## **2. Data description**

Fig. 2

ElapsedTime\_mz23\_SN: Elapsed time (s) since turning the laser on for ion signals at  $m/z$  23 for SN particles  
IonSignal\_mz23\_SN: Ion signals (A) at  $m/z$  23 for SN particles

Fig. 3

MassLoading\_SN\_Na: Mass loading (ng) of Na for SN particles  
IntegratedIonSignal\_SN\_mz23: Integrated ion signals (pC) at  $m/z$  23 for SN particles

Fig. 4

ElapsedTime\_mz23\_SN+SC+SS\_No.##: Elapsed time (s) since turning the laser on for ion signals at  $m/z$  23 for internally-mixed SN+SC+SS particles (## represent the data ID)  
IonSignal\_mz23\_SN+SC+SS\_No.1: Ion signals (A) at  $m/z$  23 for internally-mixed SN+SC+SS particles

Fig. 5

ElapsedTime\_mz23\_Seawater: Elapsed time (s) since turning the laser on for ion signals at  $m/z$  23 for pure sea salt particles  
IonSignal\_mz23\_Seawater: Ion signals (A) at  $m/z$  23 for pure sea salt particles

Fig. 6

SN/SC\_Solution: The ratio of SN to SC in the solutions

SN/SC\_SeawaterParticle\_mz30,36: The ratio of SN to SC in collected seawater + SN particles estimated using ion signals at  $m/z$  30 and 36

SN/SC\_AuthenticParticle\_mz30,36: The ratio of SN to SC in collected authentic SC + SN particles estimated using ion signals at  $m/z$  30 and 36
