# Supplementary material for: A new method to quantify particulate sodium and potassium salts (nitrate, chloride, and sulfate) by thermal desorption aerosol mass spectrometry
Source: Copernicus journal article supplement (doi:10.5194/amt-2021-228), 2021-08-26
Supplement: Supplementary file 1 [file amt-2021-228-supplement.zip › Fig 2.csv]

ElapsedTime_mz23_SN	IonSignal_mz23_SN	ElapsedTime_mz30_SN	IonSignal_mz30_SN	ElapsedTime_mz23_SC	IonSignal_mz23_SC	ElapsedTime_mz36_SC	IonSignal_mz36_SC	ElapsedTime_mz23_SS	IonSignal_mz23_SS	ElapsedTime_mz48_SS	IonSignal_mz48_SS	ElapsedTime_mz64_SS	IonSignal_mz64_SS	ElapsedTime_mz30_PN	IonSignal_mz30_PN	ElapsedTime_mz39_PN	IonSignal_mz39_PN	ElapsedTime_mz36_PC	IonSignal_mz36_PC	ElapsedTime_mz39_PC	IonSignal_mz39_PC	ElapsedTime_mz39_PS	IonSignal_mz39_PS	ElapsedTime_mz48_PS	IonSignal_mz48_PS	ElapsedTime_mz39_PS_ZA	IonSignal_mz39_PS_ZA
-1.193	1.21E-12	-1.147	4.23E-11	-1.271	6.20E-13	-1.179	7.86E-13	-1.096	5.69E-12	-1.049	4.97E-13	-1.194	3.38E-13	-1.001	3.80E-11	-1.185	4.03E-11	-1.141	2.01E-12	-1.004	3.72E-11	-1.182	4.54E-11	-1.137	2.75E-13	-1.009	5.32E-11
-0.9590	2.02E-12	-0.9140	4.46E-11	-0.9501	1.72E-12	-0.8590	9.47E-13	-0.8680	5.07E-12	-0.8220	5.22E-13	-0.9590	1.23E-13	-0.7660	4.74E-11	-0.9550	5.13E-11	-0.8230	7.05E-13	-0.6870	3.69E-11	-0.9520	3.49E-11	-0.9070	2.44E-13	-0.7681	6.13E-11
-0.7320	2.58E-12	-0.6860	4.27E-11	-0.6290	4.50E-12	-0.5371	6.93E-13	-0.6380	2.16E-12	-0.5920	5.41E-13	-0.7290	2.07E-13	-0.5260	4.12E-11	-0.7200	2.84E-11	-0.4950	8.16E-13	-0.3550	5.20E-11	-0.7160	5.37E-11	-0.6710	4.23E-13	-0.5250	7.09E-11
-0.5050	5.31E-13	-0.4600	4.04E-11	-0.3060	7.01E-13	-0.2151	2.41E-13	-0.4100	2.37E-12	-0.3650	6.47E-13	-0.5010	3.61E-13	-0.2980	4.73E-11	-0.4810	4.15E-11	-0.1740	5.03E-12	-0.0270	4.94E-11	-0.4850	5.60E-11	-0.4390	2.94E-13	-0.2891	5.90E-11
-0.2650	3.63E-12	-0.2190	4.07E-11	0.01697	8.65E-13	0.1090	4.03E-13	-0.1770	7.03E-13	-0.1310	6.86E-13	-0.2720	7.02E-13	-0.06195	4.42E-11	-0.2520	3.77E-11	0.1690	3.24E-12	0.3130	6.06E-11	-0.2520	4.90E-11	-0.2060	2.93E-13	-0.05798	5.40E-11
-0.03699	1.55E-12	0.008972	4.23E-11	0.3359	1.33E-12	0.4270	2.91E-13	0.04999	6.60E-13	0.09598	3.29E-12	-0.04001	5.22E-13	0.1750	4.29E-11	-0.01697	3.89E-11	0.4990	2.82E-12	0.6350	2.90E-11	-0.02499	6.15E-11	0.02100	2.35E-13	0.1780	7.54E-11
0.1910	4.34E-13	0.2360	3.69E-11	0.6580	2.21E-12	0.7479	8.68E-13	0.2820	6.97E-13	0.3310	3.62E-13	0.1900	3.65E-13	0.4070	4.09E-11	0.2210	3.93E-11	0.8170	1.53E-13	0.9550	3.82E-11	0.2050	4.01E-11	0.2500	4.18E-13	0.4230	5.57E-11
0.4180	2.68E-12	0.4650	4.21E-11	0.9850	1.68E-12	1.075	3.85E-13	0.5160	8.77E-13	0.5610	3.08E-13	0.4250	4.37E-13	0.6411	4.33E-11	0.4520	4.13E-11	1.139	3.97E-13	1.276	4.96E-11	0.4470	5.60E-11	0.4930	2.13E-13	0.6549	6.10E-11
0.6660	4.45E-13	0.7110	4.41E-11	1.305	6.90E-13	1.396	3.68E-12	0.7430	6.03E-13	0.7890	6.10E-13	0.6520	2.40E-13	0.8750	3.95E-11	0.6860	4.31E-11	1.458	8.03E-13	1.600	5.92E-11	0.6900	4.38E-11	0.7360	8.96E-13	0.8970	6.37E-11
0.8970	2.06E-12	0.9420	3.81E-11	1.624	5.49E-13	1.716	7.08E-13	0.9700	1.93E-12	1.018	2.48E-13	0.8800	3.80E-13	1.107	4.23E-11	0.9200	3.65E-11	1.792	3.37E-12	1.929	5.93E-11	0.9260	5.08E-11	0.9720	2.01E-13	1.124	6.30E-11
1.131	8.00E-13	1.181	4.21E-11	1.943	2.21E-12	2.034	7.33E-13	1.207	2.86E-12	1.257	4.42E-13	1.111	1.93E-13	1.342	4.26E-11	1.152	3.60E-11	2.123	5.48E-13	2.262	4.49E-11	1.154	5.38E-11	1.199	2.20E-13	1.351	6.05E-11
1.363	1.08E-12	1.409	4.50E-11	2.283	3.77E-12	2.374	4.34E-12	1.439	2.17E-12	1.485	2.78E-13	1.348	6.32E-13	1.569	4.67E-11	1.388	4.28E-11	2.447	7.83E-13	2.589	4.12E-11	1.381	5.81E-11	1.426	4.05E-13	1.590	4.13E-11
1.591	6.41E-13	1.636	3.65E-11	2.605	8.55E-13	2.696	9.25E-13	1.667	1.45E-12	1.712	2.73E-13	1.575	1.27E-12	1.800	4.54E-11	1.615	3.21E-11	2.784	6.68E-13	2.921	5.44E-11	1.610	5.65E-11	1.656	7.25E-13	1.818	5.84E-11
1.820	5.37E-13	1.866	4.01E-11	2.924	2.41E-12	3.015	1.41E-12	1.904	2.57E-12	1.950	3.30E-12	1.803	6.16E-13	2.030	4.27E-11	1.846	3.47E-11	3.112	7.58E-13	3.250	5.22E-11	1.838	6.18E-11	1.884	4.14E-13	2.045	3.98E-11
2.062	1.81E-12	2.108	3.80E-11	3.256	3.79E-12	3.348	5.43E-12	2.133	3.02E-12	2.178	2.72E-13	2.042	4.16E-13	2.264	4.49E-11	2.075	3.91E-11	3.453	5.66E-12	3.591	5.00E-11	2.081	7.59E-11	2.126	6.81E-13	2.288	7.06E-11
2.289	3.78E-13	2.335	4.48E-11	3.590	8.01E-13	3.681	2.21E-13	2.360	3.82E-12	2.410	3.65E-13	2.269	3.62E-13	2.497	4.78E-11	2.309	4.54E-11	3.784	3.44E-12	3.921	5.88E-11	2.308	6.23E-11	2.354	4.67E-13	2.520	7.01E-11
2.525	3.76E-13	2.571	4.59E-11	3.909	9.14E-13	4.002	3.66E-12	2.592	1.87E-12	2.637	8.67E-13	2.500	2.74E-12	2.734	4.93E-11	2.542	3.37E-11	4.114	5.73E-12	4.252	5.92E-11	2.536	6.90E-11	2.581	1.55E-12	2.755	5.96E-11
2.753	1.56E-12	2.798	4.50E-11	4.234	3.02E-12	4.324	7.05E-13	2.825	3.97E-12	2.870	6.21E-13	2.734	3.90E-12	2.966	4.27E-11	2.780	3.74E-11	4.445	6.94E-13	4.585	6.94E-11	2.763	6.76E-11	2.809	2.14E-13	2.986	4.81E-11
2.980	2.72E-12	3.026	4.48E-11	4.552	5.20E-12	4.643	7.57E-13	3.052	4.96E-12	3.101	9.54E-13	2.961	1.71E-12	3.196	4.51E-11	3.012	4.35E-11	4.773	5.10E-12	4.912	6.37E-11	2.991	5.19E-11	3.036	1.34E-12	3.217	6.02E-11
3.210	5.19E-13	3.256	4.46E-11	4.870	3.07E-12	4.963	8.73E-13	3.283	6.82E-13	3.329	6.44E-13	3.192	8.33E-13	3.435	5.10E-11	3.242	3.69E-11	5.101	7.83E-13	5.241	6.18E-11	3.228	4.88E-11	3.273	5.25E-13	3.453	6.71E-11
3.439	8.10E-13	3.484	4.32E-11	5.195	2.61E-12	5.287	2.84E-12	3.512	3.47E-12	3.558	5.50E-13	3.421	1.33E-12	3.674	4.70E-11	3.481	3.01E-11	5.423	2.48E-13	5.568	6.14E-11	3.455	4.71E-11	3.502	4.30E-13	3.690	7.83E-11
3.666	4.41E-12	3.714	4.08E-11	5.514	3.97E-12	5.606	8.47E-13	3.739	8.71E-13	3.785	5.92E-13	3.648	7.44E-13	3.907	4.17E-11	3.720	5.18E-11	5.750	4.66E-12	5.886	6.86E-11	3.699	6.65E-11	3.745	6.87E-13	3.926	6.67E-11
3.896	5.10E-13	3.941	4.63E-11	5.838	2.34E-12	5.929	3.05E-12	3.969	2.29E-12	4.014	5.43E-13	3.878	4.54E-13	4.139	4.10E-11	3.953	3.67E-11	6.095	2.85E-12	6.232	6.05E-11	3.927	5.00E-11	3.972	2.87E-13	4.159	7.23E-11
4.123	8.10E-13	4.169	4.27E-11	6.157	2.85E-12	6.252	3.71E-12	4.195	7.24E-13	4.241	1.68E-12	4.104	6.44E-13	4.374	5.01E-11	4.184	5.12E-11	6.414	1.81E-12	6.551	3.84E-11	4.172	5.42E-11	4.217	8.11E-13	4.386	5.47E-11
4.352	2.76E-12	4.400	4.43E-11	6.486	4.94E-12	6.578	2.51E-12	4.432	2.87E-12	4.478	4.42E-13	4.331	4.99E-13	4.608	4.65E-11	4.420	4.19E-11	6.733	4.91E-12	6.873	5.52E-11	4.407	6.44E-11	4.452	1.77E-12	4.617	6.76E-11
4.582	3.80E-12	4.627	4.53E-11	6.811	4.34E-12	6.902	2.67E-12	4.660	9.86E-13	4.705	2.64E-13	4.569	3.04E-13	4.837	4.84E-11	4.653	5.32E-11	7.064	4.93E-12	7.203	7.25E-11	4.643	6.37E-11	4.688	4.38E-13	4.859	6.21E-11
4.820	7.16E-13	4.865	4.45E-11	7.130	4.45E-12	7.221	6.47E-13	4.890	3.52E-12	4.935	2.96E-13	4.798	1.78E-13	5.076	5.11E-11	4.883	5.04E-11	7.391	4.26E-12	7.529	5.81E-11	4.877	6.56E-11	4.923	2.08E-12	5.097	7.30E-11
5.062	4.58E-13	5.108	4.38E-11	7.451	8.35E-13	7.542	4.86E-13	5.124	1.16E-12	5.169	2.01E-13	5.029	3.56E-12	5.310	4.11E-11	5.121	4.28E-11	7.720	2.98E-12	7.860	5.43E-11	5.107	6.91E-11	5.153	5.15E-13	5.324	7.38E-11
5.302	4.53E-13	5.347	3.88E-11	7.769	3.20E-12	7.860	6.76E-12	5.353	2.22E-12	5.399	3.75E-13	5.262	4.10E-13	5.540	4.19E-11	5.356	7.30E-11	8.051	4.66E-12	8.194	6.77E-11	5.334	6.02E-11	5.380	2.24E-13	5.565	5.62E-11
5.529	5.37E-13	5.575	3.97E-11	8.103	1.11E-12	8.193	7.97E-13	5.580	5.01E-13	5.626	5.64E-13	5.489	2.76E-12	5.773	4.70E-11	5.585	5.87E-11	8.379	1.40E-11	8.516	7.05E-11	5.562	6.27E-11	5.607	8.84E-13	5.792	6.05E-11
5.757	3.44E-12	5.803	4.23E-11	8.423	6.48E-13	8.514	4.05E-12	5.808	2.27E-12	5.854	3.53E-13	5.717	2.60E-13	6.020	5.00E-11	5.819	4.49E-11	8.704	7.24E-12	8.848	8.93E-11	5.804	6.40E-11	5.849	5.31E-13	6.028	6.59E-11
5.995	3.12E-12	6.040	4.51E-11	8.742	4.36E-12	8.842	2.44E-12	6.040	2.77E-12	6.086	3.40E-13	5.949	1.96E-13	6.251	4.48E-11	6.066	5.79E-11	9.044	4.91E-12	9.181	6.71E-11	6.051	8.19E-11	6.096	3.55E-13	6.255	8.54E-11
6.222	1.77E-12	6.269	4.55E-11	9.091	2.83E-12	9.182	1.74E-11	6.274	3.32E-12	6.320	4.21E-13	6.180	1.60E-12	6.483	4.83E-11	6.297	4.88E-11	9.363	1.10E-11	9.500	7.85E-11	6.278	7.59E-11	6.324	7.25E-13	6.495	1.05E-10
6.460	3.49E-12	6.507	3.87E-11	9.411	6.67E-12	9.507	3.74E-12	6.502	1.23E-12	6.548	6.46E-13	6.411	2.45E-13	6.715	5.36E-11	6.529	5.93E-11	9.684	2.16E-11	9.821	1.04E-10	6.513	7.12E-11	6.558	2.49E-13	6.740	1.04E-10
6.692	4.82E-12	6.737	4.60E-11	9.737	2.07E-12	9.828	5.02E-12	6.729	2.95E-12	6.775	1.70E-12	6.639	1.33E-12	6.947	4.90E-11	6.760	7.49E-11	10.00	3.06E-11	10.14	9.01E-11	6.746	5.13E-11	6.792	3.83E-13	6.977	7.29E-11
6.919	6.86E-12	6.968	4.55E-11	10.06	6.86E-12	10.15	7.90E-12	6.959	2.68E-12	7.004	2.31E-12	6.868	4.08E-13	7.182	5.94E-11	6.993	6.13E-11	10.33	6.74E-11	10.46	9.17E-11	6.975	7.37E-11	7.021	3.30E-12	7.205	7.07E-11
7.149	5.49E-12	7.198	5.55E-11	10.38	7.36E-12	10.48	1.93E-11	7.186	5.46E-13	7.232	6.14E-13	7.095	1.87E-12	7.413	6.45E-11	7.227	7.91E-11	10.66	4.00E-11	10.79	1.20E-10	7.202	7.98E-11	7.248	4.52E-13	7.448	8.89E-11
7.383	9.30E-12	7.428	6.42E-11	10.70	1.45E-11	10.80	3.43E-11	7.413	4.34E-12	7.459	6.75E-13	7.322	5.69E-13	7.651	8.85E-11	7.458	8.20E-11	10.98	9.47E-11	11.12	1.88E-10	7.430	7.00E-11	7.475	4.77E-13	7.681	6.15E-11
7.627	1.98E-11	7.672	7.11E-11	11.04	3.76E-11	11.13	9.89E-12	7.646	8.02E-13	7.692	2.80E-13	7.550	2.70E-12	7.909	1.11E-10	7.713	8.34E-11	11.30	9.45E-11	11.44	1.60E-10	7.657	7.82E-11	7.702	6.28E-13	7.911	5.02E-11
7.856	4.11E-11	7.901	7.01E-11	11.36	4.08E-11	11.45	5.16E-11	7.873	2.83E-12	7.919	2.56E-13	7.782	5.58E-13	8.165	1.46E-10	7.970	1.41E-10	11.62	1.35E-10	11.76	1.97E-10	7.884	7.80E-11	7.929	2.07E-12	8.155	6.08E-11
8.083	6.35E-11	8.128	8.83E-11	11.68	7.47E-11	11.77	5.58E-11	8.101	1.76E-12	8.149	3.35E-13	8.010	4.46E-13	8.392	1.93E-10	8.211	1.51E-10	11.95	1.78E-10	12.08	2.85E-10	8.122	5.74E-11	8.168	3.39E-13	8.394	9.93E-11
8.310	7.14E-11	8.355	1.18E-10	11.99	9.15E-11	12.08	1.00E-10	8.331	4.66E-12	8.377	8.09E-13	8.240	7.48E-13	8.623	2.29E-10	8.438	2.25E-10	12.28	1.96E-10	12.42	3.61E-10	8.350	7.43E-11	8.395	1.57E-13	8.630	6.43E-11
8.541	1.11E-10	8.586	1.53E-10	12.31	1.28E-10	12.40	1.37E-10	8.559	6.23E-13	8.604	2.87E-13	8.468	4.09E-13	8.861	2.98E-10	8.669	2.92E-10	12.61	1.99E-10	12.74	3.34E-10	8.577	5.04E-11	8.622	2.60E-13	8.863	8.39E-11
8.768	1.19E-10	8.814	1.74E-10	12.63	1.97E-10	12.72	1.61E-10	8.801	3.17E-12	8.849	4.67E-13	8.695	6.03E-13	9.088	3.59E-10	8.907	2.79E-10	12.94	2.09E-10	13.08	2.83E-10	8.813	7.82E-11	8.859	4.76E-13	9.103	8.70E-11
8.995	1.58E-10	9.041	2.08E-10	12.95	2.08E-10	13.04	2.11E-10	9.037	4.01E-12	9.083	3.46E-13	8.941	6.50E-13	9.318	4.19E-10	9.134	3.94E-10	13.26	1.48E-10	13.40	2.27E-10	9.040	8.61E-11	9.086	4.69E-13	9.330	1.09E-10
9.223	1.90E-10	9.268	2.62E-10	13.27	2.44E-10	13.36	1.79E-10	9.265	3.10E-12	9.313	2.97E-13	9.174	4.30E-13	9.545	4.52E-10	9.363	3.28E-10	13.59	1.10E-10	13.73	1.81E-10	9.284	7.44E-11	9.330	2.68E-13	9.557	6.18E-11
9.450	2.22E-10	9.496	2.83E-10	13.60	2.21E-10	13.69	1.69E-10	9.495	8.27E-13	9.540	2.36E-13	9.404	4.72E-13	9.775	4.76E-10	9.591	3.74E-10	13.91	1.07E-10	14.05	1.56E-10	9.511	9.19E-11	9.557	7.15E-13	9.785	1.13E-10
9.679	1.93E-10	9.724	2.86E-10	13.92	1.53E-10	14.01	1.56E-10	9.722	8.71E-13	9.768	2.62E-13	9.631	3.34E-12	10.00	4.78E-10	9.820	3.52E-10	14.23	8.47E-11	14.37	1.80E-10	9.739	6.67E-11	9.785	4.71E-13	10.02	8.04E-11
9.906	1.49E-10	9.952	3.29E-10	14.24	1.10E-10	14.33	9.85E-11	9.949	4.02E-12	9.997	5.46E-13	9.858	2.00E-12	10.23	4.42E-10	10.05	3.49E-10	14.55	8.34E-11	14.69	1.00E-10	9.967	5.28E-11	10.01	5.00E-13	10.25	7.44E-11
10.13	1.58E-10	10.18	3.25E-10	14.56	6.34E-11	14.65	1.24E-10	10.18	6.68E-13	10.22	7.56E-13	10.09	5.78E-13	10.46	3.01E-10	10.28	2.59E-10	14.88	7.48E-11	15.01	1.43E-10	10.19	7.64E-11	10.24	2.07E-12	10.48	9.13E-11
10.37	9.96E-11	10.41	3.09E-10	14.88	3.40E-11	14.97	8.77E-11	10.41	2.80E-12	10.45	2.30E-13	10.32	3.60E-13	10.70	2.03E-10	10.50	1.99E-10	15.19	6.60E-11	15.33	1.22E-10	10.44	1.05E-10	10.48	6.37E-13	10.71	9.84E-11
10.60	7.02E-11	10.64	2.07E-10	15.20	3.88E-11	15.29	7.36E-11	10.63	4.49E-13	10.68	6.16E-13	10.54	1.95E-12	10.94	1.40E-10	10.74	1.47E-10	15.53	7.21E-11	15.66	1.23E-10	10.68	1.02E-10	10.73	2.10E-13	10.94	8.42E-11
10.82	3.14E-11	10.87	1.11E-10	15.52	2.46E-11	15.62	5.29E-11	10.86	7.01E-13	10.91	4.65E-13	10.77	3.70E-13	11.17	8.64E-11	10.98	9.36E-11	15.85	6.65E-11	15.98	1.24E-10	10.91	7.88E-11	10.96	3.43E-12	11.18	7.87E-11
11.07	6.91E-12	11.11	8.50E-11	15.85	3.31E-11	15.94	4.06E-11	11.09	7.43E-12	11.14	2.88E-13	11.00	6.92E-13	11.40	8.34E-11	11.22	9.07E-11	16.17	6.06E-11	16.31	1.36E-10	11.14	1.09E-10	11.19	2.06E-13	11.41	8.82E-11
11.30	7.83E-12	11.34	6.24E-11	16.17	2.71E-11	16.26	6.73E-11	11.32	7.53E-13	11.37	2.72E-13	11.23	7.09E-13	11.63	6.25E-11	11.45	8.68E-11	16.50	5.14E-11	16.64	1.17E-10	11.37	8.93E-11	11.42	3.39E-13	11.64	7.85E-11
11.53	6.72E-13	11.57	5.90E-11	16.49	4.51E-11	16.58	5.44E-11	11.57	3.70E-12	11.61	2.88E-13	11.46	2.07E-13	11.88	6.49E-11	11.68	7.96E-11	16.83	6.54E-11	16.97	1.29E-10	11.60	9.78E-11	11.65	2.92E-13	11.88	8.25E-11
11.75	3.98E-12	11.80	5.40E-11	16.81	9.59E-12	16.90	6.16E-11	11.80	9.23E-13	11.85	2.22E-12	11.70	4.30E-13	12.12	6.00E-11	11.92	8.00E-11	17.16	8.86E-11	17.30	8.64E-11	11.84	8.22E-11	11.89	5.72E-13	12.11	8.93E-11
11.98	5.52E-12	12.03	4.92E-11	17.13	2.51E-11	17.22	3.52E-11	12.03	2.16E-12	12.08	1.88E-12	11.94	5.97E-13	12.35	5.77E-11	12.16	9.07E-11	17.48	6.19E-11	17.62	1.25E-10	12.08	6.44E-11	12.13	2.26E-13	12.34	7.11E-11
12.21	2.01E-12	12.25	4.41E-11	17.46	2.04E-11	17.55	4.55E-11	12.26	5.50E-13	12.30	7.24E-13	12.17	1.98E-13	12.59	6.04E-11	12.39	1.05E-10	17.80	4.76E-11	17.94	9.78E-11	12.32	9.43E-11	12.36	2.56E-13	12.57	8.81E-11
12.44	5.48E-12	12.49	5.09E-11	17.78	2.86E-11	17.87	4.43E-11	12.49	3.42E-12	12.54	7.01E-13	12.39	2.18E-13	12.83	5.34E-11	12.63	1.05E-10	18.13	5.16E-11	18.27	1.22E-10	12.55	7.64E-11	12.60	4.50E-13	12.81	7.65E-11
12.68	2.59E-12	12.73	4.34E-11	18.10	1.69E-11	18.19	5.05E-11	12.72	2.06E-12	12.77	3.87E-13	12.63	3.80E-13	13.06	5.28E-11	12.87	8.80E-11	18.46	5.16E-11	18.59	9.43E-11	12.79	7.30E-11	12.83	2.89E-13	13.04	6.31E-11
12.91	8.97E-13	12.96	4.69E-11	18.42	2.59E-11	18.51	4.72E-11	12.95	5.08E-12	13.00	3.68E-12	12.86	4.03E-13	13.30	4.90E-11	13.11	7.42E-11	18.78	6.19E-11	18.92	1.32E-10	13.03	5.96E-11	13.07	5.47E-13	13.27	6.13E-11
13.15	4.42E-12	13.20	4.77E-11	18.74	1.78E-11	18.83	4.94E-11	13.18	3.82E-12	13.23	5.76E-13	13.09	5.68E-13	13.53	4.98E-11	13.34	7.36E-11	19.11	5.76E-11	19.25	1.05E-10	13.27	7.40E-11	13.32	3.41E-13	13.50	8.62E-11
13.38	7.56E-13	13.42	4.21E-11	19.06	6.80E-12	19.15	3.64E-11	13.42	4.98E-12	13.46	3.09E-13	13.32	2.48E-12	13.76	4.72E-11	13.57	7.46E-11	19.43	6.61E-11	19.57	1.08E-10	13.52	7.39E-11	13.56	3.85E-13	13.72	7.82E-11
13.62	2.96E-12	13.66	3.95E-11	19.39	8.66E-12	19.48	3.43E-11	13.65	8.24E-13	13.69	4.97E-13	13.56	6.00E-13	13.99	4.68E-11	13.80	5.61E-11	19.76	4.90E-11	19.89	9.58E-11	13.76	7.76E-11	13.81	5.88E-13	13.95	8.39E-11
13.84	8.69E-13	13.89	4.65E-11	19.70	1.11E-11	19.80	5.24E-11	13.87	7.39E-13	13.92	3.79E-13	13.78	3.81E-13	14.23	4.46E-11	14.04	7.64E-11	20.07	3.88E-11	20.21	9.34E-11	14.01	6.31E-11	14.05	3.66E-13	14.19	8.80E-11
14.07	1.94E-12	14.12	4.22E-11	20.03	6.78E-12	20.12	4.65E-11	14.10	4.48E-12	14.15	2.83E-13	14.01	1.77E-13	14.47	4.49E-11	14.28	5.90E-11	20.39	3.67E-11	20.54	9.53E-11	14.24	4.74E-11	14.29	2.28E-13	14.41	6.74E-11
14.30	9.20E-13	14.35	3.78E-11	20.36	2.04E-11	20.46	3.62E-11	14.33	6.87E-13	14.38	1.63E-13	14.24	4.71E-13	14.70	4.49E-11	14.51	6.45E-11	20.73	4.31E-11	20.86	1.14E-10	14.48	7.28E-11	14.53	2.34E-13	14.65	7.41E-11
14.54	9.42E-13	14.59	4.19E-11	20.69	1.15E-11	20.78	4.43E-11	14.56	5.54E-12	14.60	7.83E-13	14.47	2.83E-12	14.93	4.71E-11	14.75	6.58E-11	21.05	3.87E-11	21.19	8.14E-11	14.72	5.38E-11	14.77	4.60E-13	14.88	7.18E-11
14.77	3.78E-12	14.82	3.60E-11	21.01	1.63E-11	21.11	3.94E-11	14.79	5.13E-12	14.83	4.12E-13	14.69	2.44E-13	15.17	3.90E-11	14.98	5.89E-11	21.38	5.74E-11	21.52	1.06E-10	14.95	8.04E-11	15.00	4.68E-13	15.12	7.49E-11
15.00	7.73E-13	15.04	4.48E-11	21.34	2.13E-11	21.43	8.87E-12	15.01	2.30E-12	15.06	4.86E-13	14.92	8.00E-13	15.40	4.62E-11	15.21	5.43E-11	21.70	3.33E-11	21.84	9.54E-11	15.18	6.97E-11	15.23	4.52E-13	15.35	8.22E-11
15.23	3.75E-12	15.28	3.83E-11	21.66	9.05E-12	21.75	2.04E-11	15.25	8.24E-13	15.30	1.27E-12	15.15	3.92E-13	15.64	4.15E-11	15.45	5.52E-11	22.02	3.21E-11	22.17	1.05E-10	15.41	7.58E-11	15.45	5.32E-13	15.58	6.82E-11
15.46	6.47E-13	15.50	4.43E-11	21.99	2.88E-11	22.08	3.47E-11	15.48	5.35E-12	15.53	1.01E-12	15.39	4.01E-13	15.87	4.37E-11	15.69	5.79E-11	22.35	4.55E-11	22.48	8.11E-11	15.65	7.02E-11	15.69	3.47E-13	15.81	5.40E-11
15.68	9.91E-13	15.73	4.21E-11	22.31	8.28E-12	22.40	2.62E-11	15.71	2.64E-12	15.76	2.04E-13	15.62	6.99E-13	16.10	3.97E-11	15.92	6.20E-11	22.67	1.00E-11	22.81	8.29E-11	15.88	6.41E-11	15.92	8.82E-13	16.03	6.90E-11
15.93	1.51E-11	15.97	3.74E-11	22.63	7.34E-12	22.72	4.00E-11	15.94	9.30E-13	15.98	3.32E-13	15.85	1.60E-13	16.34	4.10E-11	16.15	6.89E-11	22.99	3.45E-11	23.13	9.96E-11	16.12	5.87E-11	16.17	6.23E-13	16.26	8.68E-11
16.16	8.35E-12	16.20	3.92E-11	22.96	7.83E-12	23.05	2.71E-11	16.17	3.08E-12	16.22	1.49E-12	16.07	7.84E-13	16.58	3.93E-11	16.38	5.51E-11	23.32	4.40E-11	23.46	9.28E-11	16.35	6.47E-11	16.40	4.19E-13	16.49	7.28E-11
16.39	3.72E-12	16.43	3.48E-11	23.28	8.21E-12	23.38	2.39E-11	16.40	4.71E-12	16.45	3.61E-13	16.31	4.47E-13	16.82	3.66E-11	16.62	6.09E-11	23.65	2.69E-11	23.79	8.23E-11	16.59	6.73E-11	16.64	6.14E-13	16.72	5.73E-11
16.61	5.09E-12	16.66	4.00E-11	23.61	1.54E-11	23.70	1.77E-11	16.63	6.77E-13	16.68	4.29E-13	16.54	2.68E-13	17.05	4.41E-11	16.86	6.90E-11	23.99	1.72E-11	24.13	6.18E-11	16.82	5.40E-11	16.86	2.53E-13	16.95	6.25E-11
16.84	6.44E-12	16.89	3.87E-11	23.92	1.60E-11	24.02	1.54E-11	16.86	1.47E-12	16.91	2.64E-13	16.77	1.61E-13	17.28	3.77E-11	17.10	4.72E-11	24.32	3.77E-11	24.46	9.33E-11	17.05	7.17E-11	17.10	2.24E-13	17.19	7.02E-11
17.07	6.41E-12	17.12	3.70E-11	24.25	2.42E-11	24.34	8.37E-12	17.09	7.63E-13	17.14	6.04E-13	17.00	4.74E-13	17.52	4.42E-11	17.33	5.17E-11	24.65	3.07E-11	24.79	8.76E-11	17.29	6.61E-11	17.33	5.04E-13	17.43	7.15E-11
17.30	7.08E-12	17.35	3.74E-11	24.57	8.07E-12	24.66	1.85E-11	17.32	4.83E-13	17.36	5.23E-13	17.23	5.36E-13	17.77	4.49E-11	17.57	5.08E-11	24.97	3.84E-11	25.11	6.31E-11	17.52	5.63E-11	17.57	2.72E-13	17.66	8.31E-11
17.53	8.69E-12	17.58	3.30E-11	24.89	9.49E-12	24.98	1.81E-11	17.55	8.96E-13	17.59	5.73E-13	17.46	5.26E-13	18.02	4.22E-11	17.82	5.22E-11	25.30	2.96E-11	25.44	7.39E-11	17.77	8.63E-11	17.81	2.54E-13	17.90	6.02E-11
17.76	6.45E-12	17.80	3.99E-11	25.21	7.05E-12	25.31	1.95E-11	17.78	3.11E-12	17.82	2.31E-13	17.68	1.99E-12	18.25	4.15E-11	18.07	7.31E-11	25.62	2.59E-11	25.76	1.01E-10	17.99	5.90E-11	18.04	2.54E-13	18.14	4.88E-11
17.99	3.99E-12	18.03	3.82E-11	25.54	5.44E-12	25.64	2.61E-11	18.01	1.73E-12	18.05	1.31E-12	17.91	2.97E-13	18.49	3.88E-11	18.30	6.27E-11	25.96	1.93E-11	26.10	7.58E-11	18.24	6.67E-11	18.29	4.55E-13	18.38	6.00E-11
18.22	7.45E-12	18.26	3.71E-11	25.86	5.54E-12	25.96	9.49E-12	18.23	2.76E-12	18.29	2.14E-12	18.14	3.89E-13	18.72	3.89E-11	18.53	8.69E-11	26.30	2.20E-11	26.44	7.19E-11	18.49	5.34E-11	18.54	1.87E-12	18.61	7.03E-11
18.46	1.42E-11	18.50	3.83E-11	26.19	4.98E-12	26.29	7.77E-12	18.48	4.78E-12	18.54	2.88E-13	18.38	3.69E-12	18.95	3.81E-11	18.76	7.56E-11	26.62	2.71E-11	26.76	7.42E-11	18.72	6.45E-11	18.77	2.63E-13	18.84	5.74E-11
18.68	5.07E-12	18.73	4.13E-11	26.51	7.35E-12	26.61	2.93E-11	18.72	4.96E-13	18.76	6.34E-13	18.63	2.35E-13	19.18	3.74E-11	19.00	7.21E-11	26.96	1.86E-11	27.10	9.28E-11	18.98	7.29E-11	19.02	4.68E-13	19.07	6.21E-11
18.91	1.10E-11	18.96	3.97E-11	26.84	5.13E-12	26.93	7.69E-12	18.95	2.61E-12	18.99	4.22E-13	18.85	3.44E-13	19.41	3.79E-11	19.23	5.94E-11	27.29	3.68E-11	27.43	7.64E-11	19.21	8.03E-11	19.26	2.17E-12	19.31	6.05E-11
19.14	9.00E-12	19.18	3.47E-11	27.16	1.39E-11	27.26	2.57E-11	19.17	4.13E-12	19.22	4.75E-13	19.08	5.94E-13	19.65	4.18E-11	19.46	6.40E-11	27.62	3.17E-11	27.77	1.22E-10	19.45	6.40E-11	19.49	4.77E-13	19.54	9.71E-11
19.37	8.60E-12	19.41	3.77E-11	27.50	1.70E-11	27.59	7.05E-12	19.40	7.86E-13	19.45	5.80E-13	19.31	1.95E-13	19.88	4.10E-11	19.69	4.29E-11	27.96	7.29E-12	28.10	7.16E-11	19.68	7.08E-11	19.73	7.20E-13	19.77	6.76E-11
19.60	2.25E-11	19.65	3.81E-11	27.82	5.25E-12	27.91	1.98E-11	19.64	9.67E-13	19.69	5.02E-13	19.54	2.05E-13	20.11	3.81E-11	19.93	5.48E-11	28.30	2.15E-11	28.44	8.10E-11	19.91	7.27E-11	19.96	1.43E-12	20.00	6.35E-11
19.83	3.19E-11	19.88	3.61E-11	28.14	5.89E-12	28.23	2.06E-11	19.88	9.08E-13	19.94	2.42E-12	19.78	4.40E-13	20.35	3.85E-11	20.16	5.76E-11	28.63	2.09E-11	28.77	8.38E-11	20.14	6.50E-11	20.19	6.10E-13	20.22	7.56E-11
20.07	3.26E-11	20.12	3.47E-11	28.46	1.13E-11	28.55	2.17E-11	20.12	1.61E-12	20.16	7.51E-13	20.03	7.31E-13	20.58	4.14E-11	20.39	6.20E-11	28.96	1.73E-11	29.10	7.39E-11	20.37	6.19E-11	20.42	2.06E-13	20.45	7.25E-11
20.30	1.74E-11	20.35	4.47E-11	28.80	9.96E-12	28.90	1.62E-11	20.35	2.45E-12	20.39	5.09E-13	20.26	5.44E-13	20.81	4.17E-11	20.62	6.09E-11	29.28	9.43E-12	29.42	1.02E-10	20.61	5.51E-11	20.65	5.36E-13	20.68	5.84E-11
20.53	9.66E-12	20.57	3.32E-11	29.13	1.46E-11	29.22	2.81E-11	20.57	3.97E-12	20.62	4.33E-13	20.48	1.14E-12	21.04	3.77E-11	20.86	7.26E-11	29.61	1.16E-11	29.74	8.00E-11	20.85	6.24E-11	20.90	4.80E-13	20.91	6.82E-11
20.76	3.27E-11	20.80	3.86E-11	29.45	4.58E-12	29.54	9.36E-12	20.80	9.62E-13	20.85	3.99E-12	20.71	7.97E-13	21.27	3.56E-11	21.09	6.77E-11	29.93	1.86E-11	30.07	7.14E-11	21.08	6.04E-11	21.13	2.84E-13	21.15	6.30E-11
20.99	9.44E-12	21.04	3.72E-11	29.77	5.49E-12	29.86	1.86E-11	21.03	4.18E-12	21.07	5.25E-13	20.94	2.14E-13	21.52	4.29E-11	21.32	6.71E-11	30.26	1.94E-11	30.40	8.04E-11	21.31	5.39E-11	21.36	5.26E-12	21.38	8.14E-11
21.22	2.19E-11	21.27	3.45E-11	30.09	7.49E-12	30.19	8.72E-12	21.26	8.73E-13	21.30	3.64E-13	21.16	3.41E-13	21.76	3.49E-11	21.56	5.04E-11	30.58	1.66E-11	30.73	5.28E-11	21.54	6.18E-11	21.59	2.53E-13	21.61	6.52E-11
21.45	4.79E-11	21.49	4.24E-11	30.42	1.28E-11	30.51	2.14E-11	21.49	6.25E-13	21.53	5.45E-13	21.40	9.08E-13	21.99	3.25E-11	21.80	6.36E-11	30.92	1.21E-11	31.06	7.35E-11	21.78	7.32E-11	21.83	4.59E-13	21.85	6.30E-11
21.67	2.23E-11	21.72	3.38E-11	30.75	1.01E-12	30.84	1.54E-11	21.71	1.10E-12	21.76	5.76E-13	21.62	1.74E-13	22.22	3.63E-11	22.03	5.94E-11	31.24	9.04E-12	31.38	6.86E-11	22.02	7.42E-11	22.07	4.86E-12	22.09	5.80E-11
21.92	2.68E-11	21.97	3.75E-11	31.07	5.38E-12	31.16	5.84E-12	21.94	4.26E-12	21.99	6.70E-13	21.85	6.15E-13	22.46	3.71E-11	22.27	7.69E-11	31.56	1.81E-11	31.70	7.47E-11	22.25	8.23E-11	22.29	6.09E-13	22.32	8.01E-11
22.15	2.28E-11	22.20	4.55E-11	31.39	2.25E-12	31.48	8.91E-12	22.17	4.83E-12	22.22	4.37E-13	22.08	2.90E-13	22.69	3.59E-11	22.50	7.67E-11	31.90	1.74E-11	32.04	8.06E-11	22.48	6.33E-11	22.52	4.37E-13	22.55	7.48E-11
22.38	3.12E-11	22.42	3.70E-11	31.71	6.16E-12	31.80	2.96E-11	22.40	2.48E-12	22.45	3.82E-13	22.31	8.28E-13	22.94	3.36E-11	22.73	6.78E-11	32.23	9.23E-12	32.36	9.12E-11	22.72	6.88E-11	22.76	2.87E-13	22.79	6.44E-11
22.61	3.48E-11	22.66	3.95E-11	32.03	4.82E-12	32.12	1.00E-11	22.63	8.05E-13	22.68	2.63E-13	22.54	5.63E-13	23.18	3.66E-11	22.99	6.71E-11	32.55	8.02E-13	32.68	7.98E-11	22.95	6.44E-11	22.99	2.06E-12	23.03	7.04E-11
22.84	3.74E-11	22.88	3.47E-11	32.35	6.04E-12	32.44	2.11E-11	22.87	8.98E-13	22.91	2.00E-12	22.77	4.53E-13	23.41	3.96E-11	23.22	5.49E-11	32.87	1.83E-11	33.01	6.00E-11	23.17	4.75E-11	23.22	1.25E-12	23.26	6.94E-11
23.06	3.57E-11	23.11	3.97E-11	32.67	3.02E-12	32.76	1.55E-11	23.10	2.17E-12	23.15	3.14E-13	23.01	7.52E-13	23.65	3.76E-11	23.45	6.60E-11	33.21	1.80E-11	33.35	8.46E-11	23.41	6.62E-11	23.45	1.07E-12	23.49	6.47E-11
23.29	3.63E-11	23.34	3.68E-11	32.99	8.33E-12	33.08	6.20E-12	23.33	4.72E-12	23.38	2.45E-13	23.24	5.06E-12	23.89	3.89E-11	23.70	7.07E-11	33.54	6.76E-12	33.68	6.80E-11	23.64	6.41E-11	23.69	2.22E-12	23.72	7.68E-11
23.54	3.10E-11	23.58	3.36E-11	33.32	4.12E-12	33.41	6.69E-12	23.56	6.33E-13	23.61	5.01E-13	23.47	4.50E-13	24.11	3.91E-11	23.93	6.84E-11	33.88	1.24E-11	34.02	7.64E-11	23.88	8.19E-11	23.93	6.40E-13	23.95	5.36E-11
23.78	4.80E-11	23.82	3.70E-11	33.64	1.12E-11	33.73	1.00E-12	23.79	6.74E-13	23.83	4.60E-13	23.70	2.23E-12	24.35	3.97E-11	24.16	6.75E-11	34.20	1.73E-11	34.35	6.97E-11	24.11	6.44E-11	24.16	7.57E-13	24.18	5.67E-11
24.00	3.70E-11	24.05	3.81E-11	33.96	7.04E-12	34.05	1.48E-11	24.02	3.03E-12	24.06	4.19E-13	23.93	5.03E-13	24.59	3.37E-11	24.40	5.93E-11	34.54	7.71E-12	34.67	8.86E-11	24.34	6.33E-11	24.39	1.86E-12	24.42	7.84E-11
24.23	4.29E-11	24.28	3.55E-11	34.28	6.72E-12	34.37	4.43E-12	24.24	8.24E-13	24.29	4.86E-13	24.15	8.60E-13	24.83	3.38E-11	24.63	5.63E-11	34.87	2.39E-11	35.01	9.41E-11	24.57	7.55E-11	24.62	4.40E-13	24.65	7.44E-11
24.48	3.36E-11	24.53	4.08E-11	34.61	4.13E-12	34.70	6.09E-12	24.47	3.69E-12	24.52	7.53E-13	24.38	6.11E-13	25.07	3.17E-11	24.88	6.13E-11	35.19	7.29E-12	35.33	6.10E-11	24.82	6.88E-11	24.86	1.90E-13	24.89	6.57E-11
24.71	3.56E-11	24.75	3.60E-11	34.95	6.54E-12	35.04	1.63E-11	24.70	1.35E-12	24.75	4.21E-13	24.61	4.84E-13	25.30	3.52E-11	25.11	6.26E-11	35.52	1.87E-11	35.65	8.72E-11	25.05	7.93E-11	25.10	6.87E-13	25.13	7.10E-11
24.93	2.16E-11	24.98	3.97E-11	35.27	6.65E-12	35.36	4.52E-12	24.93	4.71E-12	24.97	2.01E-12	24.84	1.77E-12	25.54	3.63E-11	25.35	6.58E-11	35.85	7.59E-12	35.99	7.32E-11	25.29	7.85E-11	25.33	3.65E-12	25.36	6.29E-11
25.17	2.18E-11	25.21	3.34E-11	35.59	3.20E-12	35.68	9.22E-13	25.16	3.75E-12	25.20	2.33E-13	25.07	2.59E-13	25.77	3.99E-11	25.58	6.89E-11	36.18	7.60E-12	36.32	5.83E-11	25.52	7.31E-11	25.57	4.41E-13	25.60	6.19E-11
25.40	1.02E-11	25.44	3.33E-11	35.91	4.75E-12	36.00	8.41E-12	25.38	5.42E-12	25.43	1.40E-12	25.29	1.44E-12	26.00	4.26E-11	25.82	7.91E-11	36.50	7.79E-12	36.64	1.16E-10	25.76	7.99E-11	25.80	2.63E-13	25.82	6.13E-11
25.63	4.65E-11	25.67	4.01E-11	36.24	1.81E-12	36.33	1.40E-11	25.62	2.59E-12	25.66	3.30E-13	25.53	7.71E-13	26.24	3.42E-11	26.05	7.55E-11	36.83	1.40E-11	36.96	7.58E-11	25.98	5.82E-11	26.03	7.76E-13	26.06	5.14E-11
25.87	4.29E-11	25.91	3.39E-11	36.56	7.65E-12	36.66	1.32E-11	25.85	3.11E-12	25.89	2.65E-13	25.76	8.93E-13	26.47	4.03E-11	26.28	7.72E-11	37.15	6.68E-12	37.29	6.92E-11	26.21	3.59E-11	26.26	4.56E-12	26.30	7.24E-11
26.10	4.12E-11	26.15	3.57E-11	36.89	9.44E-13	36.98	3.11E-11	26.07	5.27E-12	26.12	4.93E-13	25.98	3.60E-13	26.70	4.12E-11	26.51	6.75E-11	37.48	1.60E-11	37.61	6.95E-11	26.45	4.40E-11	26.50	2.40E-12	26.54	7.26E-11
26.33	3.61E-11	26.38	3.70E-11	37.21	3.42E-12	37.30	5.72E-12	26.30	8.54E-13	26.35	2.91E-12	26.21	7.64E-13	26.93	3.76E-11	26.75	6.33E-11	37.80	2.25E-11	37.94	7.04E-11	26.68	7.72E-11	26.72	4.70E-12	26.77	6.66E-11
26.57	2.91E-11	26.61	3.35E-11	37.54	6.59E-12	37.63	6.88E-12	26.54	9.03E-13	26.59	4.99E-13	26.44	1.56E-12	27.16	3.84E-11	26.98	7.61E-11	38.13	1.11E-11	38.27	9.56E-11	26.92	7.04E-11	26.96	7.13E-13	27.00	5.81E-11
26.80	3.83E-11	26.84	3.41E-11	37.86	3.38E-12	37.95	1.48E-11	26.77	6.83E-13	26.82	2.10E-12	26.68	7.65E-13	27.39	3.81E-11	27.21	6.96E-11	38.45	1.21E-11	38.59	7.86E-11	27.16	7.09E-11	27.20	8.09E-13	27.24	7.56E-11
27.03	3.06E-11	27.07	3.55E-11	38.18	3.43E-12	38.27	1.94E-11	27.01	1.86E-12	27.06	7.98E-13	26.91	4.41E-12	27.62	3.51E-11	27.44	9.79E-11	38.77	1.63E-11	38.91	8.31E-11	27.39	7.06E-11	27.44	6.83E-13	27.48	6.00E-11
27.25	1.98E-11	27.30	3.89E-11	38.50	1.75E-12	38.59	9.77E-12	27.24	2.35E-12	27.28	5.47E-13	27.15	4.02E-12	27.86	3.30E-11	27.67	7.22E-11	39.11	5.14E-12	39.25	8.23E-11	27.63	7.98E-11	27.68	5.41E-12	27.71	7.81E-11
27.48	3.20E-11	27.53	3.58E-11	38.82	1.00E-12	38.92	6.60E-12	27.47	3.43E-12	27.51	9.18E-13	27.38	7.27E-13	28.09	4.04E-11	27.90	5.59E-11	39.44	7.87E-12	39.58	6.99E-11	27.86	7.55E-11	27.91	4.29E-12	27.94	6.15E-11
27.71	1.01E-11	27.76	3.64E-11	39.14	7.02E-12	39.24	1.87E-11	27.70	2.95E-12	27.74	3.80E-13	27.61	7.88E-13	28.32	3.53E-11	28.14	7.94E-11	39.76	7.96E-12	39.90	6.84E-11	28.10	5.87E-11	28.14	4.42E-12	28.18	8.06E-11
27.94	2.82E-11	27.98	4.13E-11	39.48	4.80E-12	39.57	1.06E-11	27.93	4.67E-12	27.97	8.30E-13	27.84	4.88E-12	28.55	3.42E-11	28.37	6.94E-11	40.08	1.41E-11	40.22	7.04E-11	28.33	4.73E-11	28.37	2.81E-12	28.41	7.68E-11
28.17	3.15E-11	28.22	3.66E-11	39.80	3.55E-12	39.89	1.26E-11	28.17	5.72E-12	28.22	7.18E-13	28.07	9.28E-13	28.79	4.18E-11	28.60	7.20E-11	40.40	1.79E-11	40.54	7.89E-11	28.56	6.68E-11	28.60	7.05E-12	28.64	7.55E-11
28.41	2.77E-11	28.45	3.94E-11	40.13	1.79E-12	40.22	1.07E-11	28.42	1.23E-12	28.46	2.00E-12	28.31	3.97E-13	29.03	3.69E-11	28.84	7.13E-11	40.73	7.33E-12	40.87	7.49E-11	28.79	5.68E-11	28.84	3.09E-12	28.87	6.61E-11
28.63	2.78E-11	28.68	3.52E-11	40.46	5.24E-12	40.55	1.66E-11	28.66	3.76E-12	28.71	3.53E-13	28.55	1.54E-12	29.27	3.63E-11	29.07	7.72E-11	41.06	1.34E-11	41.20	7.82E-11	29.02	7.40E-11	29.07	3.36E-13	29.10	7.25E-11
28.86	2.24E-11	28.91	3.33E-11	40.78	4.93E-12	40.87	5.34E-12	28.89	7.05E-13	28.94	4.37E-13	28.80	1.50E-13	29.50	3.87E-11	29.31	7.47E-11	41.39	1.12E-11	41.53	9.43E-11	29.25	5.76E-11	29.30	2.98E-12	29.34	6.59E-11
29.10	2.35E-11	29.14	4.12E-11	41.11	1.04E-11	41.20	1.70E-11	29.12	2.23E-12	29.16	3.77E-13	29.03	3.75E-13	29.73	3.52E-11	29.54	5.80E-11	41.73	7.13E-12	41.87	7.44E-11	29.48	4.90E-11	29.53	3.28E-12	29.58	7.01E-11
29.32	2.85E-11	29.37	3.78E-11	41.43	1.26E-11	41.52	5.70E-12	29.35	6.79E-13	29.39	4.43E-13	29.25	2.86E-12	29.96	3.48E-11	29.78	9.85E-11	42.06	8.25E-12	42.20	6.90E-11	29.72	7.28E-11	29.76	1.56E-12	29.82	8.18E-11
29.56	2.50E-11	29.61	3.90E-11	41.76	3.41E-12	41.85	8.70E-12	29.57	2.34E-12	29.62	4.27E-12	29.48	1.99E-12	30.20	4.46E-11	30.01	8.15E-11	42.38	1.78E-11	42.52	9.01E-11	29.97	6.38E-11	30.01	3.31E-12	30.04	4.61E-11
29.79	2.07E-11	29.83	3.06E-11	42.08	2.82E-12	42.17	6.11E-12	29.80	9.35E-13	29.85	7.12E-13	29.71	2.59E-12	30.43	4.12E-11	30.24	8.02E-11	42.70	1.66E-11	42.84	7.78E-11	30.20	7.81E-11	30.24	5.47E-12	30.27	6.82E-11
30.02	2.92E-11	30.07	3.51E-11	42.41	6.97E-12	42.50	8.95E-12	30.03	4.31E-12	30.08	8.08E-13	29.94	8.62E-13	30.67	3.95E-11	30.48	6.50E-11	43.04	4.75E-12	43.18	9.39E-11	30.43	5.91E-11	30.47	3.98E-12	30.51	5.84E-11
30.26	2.08E-11	30.30	3.07E-11	42.74	1.20E-11	42.83	6.84E-12	30.27	4.05E-12	30.32	3.33E-13	30.17	3.04E-12	30.90	3.55E-11	30.71	1.01E-10	43.38	9.94E-12	43.51	9.25E-11	30.66	5.26E-11	30.71	6.37E-13	30.74	6.78E-11
30.49	7.75E-12	30.54	3.50E-11	43.05	6.47E-12	43.15	7.25E-12	30.50	4.71E-13	30.54	3.62E-13	30.41	1.09E-12	31.13	3.34E-11	30.94	9.62E-11	43.70	9.26E-12	43.85	1.03E-10	30.90	5.38E-11	30.95	5.52E-12	30.98	4.59E-11
30.72	1.93E-11	30.77	3.44E-11	43.37	1.34E-11	43.46	2.08E-11	30.73	5.49E-12	30.77	1.62E-12	30.64	4.96E-12	31.37	3.59E-11	31.18	8.39E-11	44.04	1.12E-11	44.18	8.84E-11	31.13	7.04E-11	31.18	4.69E-13	31.21	6.39E-11
30.96	1.90E-11	31.01	3.51E-11	43.70	1.53E-11	43.79	2.63E-11	30.96	9.42E-13	31.00	2.82E-13	30.86	1.10E-12	31.61	3.51E-11	31.42	6.82E-11	44.37	1.35E-11	44.51	9.09E-11	31.36	6.74E-11	31.41	5.37E-12	31.44	8.59E-11
31.19	2.98E-11	31.24	3.67E-11	44.02	5.42E-12	44.11	2.38E-11	31.18	2.16E-12	31.23	3.57E-13	31.09	2.79E-13	31.84	3.74E-11	31.66	6.93E-11	44.69	6.54E-12	44.83	9.91E-11	31.59	8.70E-11	31.64	2.66E-12	31.68	6.04E-11
31.42	7.65E-12	31.47	3.43E-11	44.34	9.04E-13	44.43	1.01E-12	31.43	2.76E-12	31.47	8.67E-13	31.32	3.70E-12	32.07	3.66E-11	31.89	8.93E-11	45.01	9.10E-12	45.15	1.02E-10	31.83	8.07E-11	31.87	9.30E-13	31.92	5.34E-11
31.67	2.16E-11	31.71	3.98E-11	44.66	8.91E-13	44.76	1.53E-11	31.65	8.13E-13	31.70	3.41E-12	31.56	2.53E-12	32.31	3.83E-11	32.12	7.63E-11	45.35	9.42E-12	45.49	1.02E-10	32.08	6.24E-11	32.12	6.48E-13	32.16	5.34E-11
31.89	5.51E-12	31.94	3.58E-11	44.98	5.35E-12	45.07	1.88E-11	31.89	6.81E-13	31.93	1.52E-12	31.79	8.46E-12	32.54	3.74E-11	32.35	8.53E-11	45.67	2.47E-11	45.81	8.56E-11	32.30	8.14E-11	32.35	6.07E-12	32.40	6.81E-11
32.12	1.61E-11	32.17	3.42E-11	45.32	3.26E-12	45.41	7.61E-12	32.12	8.53E-13	32.16	3.97E-12	32.03	6.38E-13	32.77	3.22E-11	32.58	7.01E-11	46.01	6.63E-12	46.14	7.83E-11	32.54	7.91E-11	32.59	8.75E-13	32.64	4.62E-11
32.35	1.41E-11	32.40	2.92E-11	45.64	3.67E-12	45.73	1.41E-11	32.35	3.91E-12	32.39	6.71E-13	32.25	6.55E-13	33.01	3.11E-11	32.82	8.06E-11	46.33	6.99E-12	46.47	8.76E-11	32.80	6.03E-11	32.85	8.94E-13	32.87	5.86E-11
32.59	1.13E-11	32.63	3.25E-11	45.96	7.08E-12	46.05	7.45E-12	32.58	4.12E-12	32.62	4.79E-13	32.49	5.07E-13	33.24	3.51E-11	33.05	9.88E-11	46.66	6.21E-12	46.80	9.56E-11	33.04	6.30E-11	33.08	3.55E-12	33.10	4.95E-11
32.82	8.83E-12	32.86	3.06E-11	46.28	8.75E-12	46.38	2.38E-11	32.81	4.78E-12	32.85	6.91E-13	32.71	1.33E-11	33.48	3.66E-11	33.29	8.79E-11	47.00	7.76E-12	47.14	1.13E-10	33.27	7.23E-11	33.32	9.98E-13	33.33	8.65E-11
33.05	1.96E-11	33.10	3.81E-11	46.60	2.01E-12	46.69	1.95E-11	33.04	4.41E-12	33.08	4.29E-12	32.94	5.15E-12	33.71	3.61E-11	33.52	6.37E-11	47.34	1.80E-11	47.48	1.12E-10	33.51	7.81E-11	33.55	5.64E-13	33.57	6.25E-11
33.28	8.17E-12	33.33	3.22E-11	46.94	6.54E-12	47.03	8.23E-12	33.28	2.86E-12	33.32	8.68E-13	33.18	8.45E-13	33.94	3.51E-11	33.76	7.43E-11	47.68	1.83E-11	47.81	8.45E-11	33.76	6.31E-11	33.80	4.32E-12	33.80	6.71E-11
33.51	1.31E-11	33.56	3.26E-11	47.26	5.92E-12	47.35	6.92E-12	33.51	3.13E-12	33.55	2.39E-12	33.42	5.38E-12	34.18	3.61E-11	33.99	8.76E-11	48.00	8.81E-12	48.14	1.11E-10	34.00	7.06E-11	34.05	9.48E-13	34.03	8.42E-11
33.74	9.22E-12	33.79	2.80E-11	47.59	4.23E-12	47.68	3.55E-11	33.74	2.63E-12	33.79	2.97E-12	33.65	2.53E-12	34.41	3.50E-11	34.22	6.30E-11	48.32	9.54E-13	48.46	9.62E-11	34.23	6.74E-11	34.28	3.92E-12	34.27	5.26E-11
33.99	8.30E-12	34.03	3.17E-11	47.91	5.99E-13	48.01	8.24E-12	33.97	1.85E-12	34.02	7.34E-12	33.88	8.36E-13	34.65	3.37E-11	34.46	8.17E-11	48.64	8.18E-12	48.79	9.27E-11	34.46	6.69E-11	34.51	3.40E-12	34.51	7.51E-11
34.24	1.86E-11	34.28	2.92E-11	48.23	6.74E-12	48.32	1.46E-11	34.20	7.91E-13	34.25	2.36E-12	34.11	3.55E-12	34.90	3.40E-11	34.70	8.77E-11	48.98	9.25E-12	49.12	8.20E-11	34.69	6.45E-11	34.73	7.90E-12	34.74	5.75E-11
34.47	8.27E-12	34.52	3.18E-11	48.55	3.47E-12	48.64	7.74E-12	34.44	7.61E-13	34.48	2.87E-12	34.34	2.37E-12	35.13	3.32E-11	34.94	7.74E-11	49.31	3.55E-11	49.45	8.39E-11	34.93	5.34E-11	34.97	3.21E-12	34.97	6.24E-11
34.70	8.16E-12	34.75	3.55E-11	48.87	4.91E-12	48.96	1.16E-11	34.67	3.42E-12	34.71	8.26E-13	34.57	5.14E-12	35.36	2.86E-11	35.17	1.02E-10	49.64	7.19E-12	49.77	1.01E-10	35.17	6.53E-11	35.21	5.32E-12	35.21	6.62E-11
34.93	7.02E-12	34.97	3.26E-11	49.19	4.19E-12	49.29	1.30E-11	34.90	3.34E-12	34.94	8.83E-13	34.80	4.43E-12	35.59	3.67E-11	35.41	7.79E-11	49.97	1.21E-11	50.10	6.63E-11	35.42	7.00E-11	35.47	1.15E-11	35.44	5.91E-11
35.16	2.41E-11	35.20	3.17E-11	49.52	5.87E-12	49.62	6.22E-12	35.12	4.69E-12	35.17	4.62E-12	35.03	3.44E-13	35.82	3.52E-11	35.64	8.49E-11	50.29	8.25E-12	50.43	1.01E-10	35.66	7.36E-11	35.70	7.03E-12	35.67	5.82E-11
35.39	7.17E-12	35.44	3.16E-11	49.85	3.78E-12	49.94	9.70E-13	35.35	4.60E-12	35.40	6.80E-12	35.26	5.57E-12	36.06	3.45E-11	35.87	8.18E-11	50.63	8.80E-12	50.76	8.25E-11	35.89	5.30E-11	35.93	4.03E-12	35.91	5.88E-11
35.63	1.07E-11	35.67	3.53E-11	50.17	8.03E-13	50.26	1.08E-11	35.60	2.20E-12	35.64	8.73E-13	35.49	6.11E-12	36.29	3.71E-11	36.11	6.33E-11	50.96	5.66E-12	51.10	8.38E-11	36.12	6.25E-11	36.16	4.70E-12	36.15	6.57E-11
35.85	6.68E-12	35.90	3.07E-11	50.49	5.73E-12	50.59	1.28E-11	35.83	5.45E-12	35.87	3.94E-12	35.73	7.26E-13	36.53	3.50E-11	36.34	7.07E-11	51.28	2.45E-11	51.42	1.05E-10	36.36	5.90E-11	36.41	8.83E-12	36.39	6.30E-11
36.08	8.03E-12	36.13	3.25E-11	50.81	7.02E-12	50.90	6.88E-12	36.05	4.45E-12	36.10	2.49E-12	35.96	8.62E-13	36.76	3.36E-11	36.57	6.16E-11	51.61	9.41E-12	51.76	9.48E-11	36.60	6.19E-11	36.65	7.51E-13	36.64	7.38E-11
36.31	7.94E-12	36.35	3.33E-11	51.14	5.89E-12	51.23	1.58E-11	36.30	6.77E-13	36.34	5.41E-12	36.19	3.74E-12	36.99	3.46E-11	36.80	7.06E-11	51.96	9.17E-12	52.10	9.65E-11	36.83	5.58E-11	36.87	4.46E-12	36.87	6.09E-11
36.54	6.54E-12	36.58	2.87E-11	51.46	6.09E-12	51.55	5.86E-12	36.52	5.27E-12	36.57	6.62E-13	36.43	7.91E-12	37.22	3.33E-11	37.04	8.52E-11	52.30	8.25E-12	52.43	9.17E-11	37.06	7.14E-11	37.10	6.15E-12	37.10	5.96E-11
36.77	6.95E-12	36.81	3.41E-11	51.78	4.40E-12	51.88	1.33E-11	36.75	1.08E-11	36.80	2.60E-12	36.66	1.41E-12	37.45	3.38E-11	37.27	7.72E-11	52.63	5.59E-12	52.77	1.36E-10	37.29	5.32E-11	37.33	4.02E-12	37.34	6.70E-11
37.00	6.59E-12	37.05	3.40E-11	52.11	2.68E-12	52.20	1.97E-11	36.99	3.45E-12	37.04	1.80E-12	36.90	5.56E-12	37.68	3.34E-11	37.50	8.28E-11	52.97	1.71E-11	53.11	6.48E-11	37.53	7.70E-11	37.57	8.82E-13	37.56	6.56E-11
37.24	6.16E-12	37.28	3.28E-11	52.44	7.67E-12	52.53	5.84E-12	37.22	4.16E-12	37.27	3.36E-12	37.13	4.11E-12	37.92	3.30E-11	37.73	7.44E-11	53.30	7.89E-13	53.43	1.19E-10	37.76	6.52E-11	37.80	7.77E-13	37.79	7.71E-11
37.47	1.47E-11	37.52	3.33E-11	52.77	7.53E-12	52.86	1.13E-11	37.45	3.05E-12	37.50	5.12E-13	37.36	4.42E-12	38.15	3.67E-11	37.96	1.05E-10	53.63	6.34E-12	53.76	9.51E-11	37.99	6.68E-11	38.04	5.28E-12	38.03	7.43E-11
37.70	7.47E-12	37.74	3.38E-11	53.09	9.35E-13	53.18	1.69E-11	37.69	2.18E-12	37.74	3.10E-12	37.59	3.88E-12	38.38	3.53E-11	38.20	6.76E-11	53.95	1.43E-11	54.09	9.70E-11	38.22	7.97E-11	38.27	4.20E-12	38.26	6.68E-11
37.93	1.13E-11	37.98	3.13E-11	53.41	4.14E-12	53.50	1.19E-11	37.92	2.31E-12	37.97	1.12E-12	37.83	4.28E-12	38.61	3.54E-11	38.43	6.68E-11	54.28	1.48E-11	54.42	8.67E-11	38.45	7.17E-11	38.50	4.63E-12	38.49	7.45E-11
38.17	5.12E-12	38.22	3.52E-11	53.74	3.37E-12	53.83	9.43E-13	38.15	3.22E-12	38.20	2.73E-12	38.06	7.98E-13	38.85	4.02E-11	38.66	8.29E-11	54.60	1.03E-11	54.74	1.12E-10	38.68	6.34E-11	38.73	4.32E-12	38.71	1.10E-10
38.40	7.14E-12	38.45	3.45E-11	54.06	5.26E-12	54.15	1.29E-11	38.39	2.60E-12	38.43	8.14E-12	38.29	3.79E-12	39.08	3.05E-11	38.89	8.01E-11	54.93	5.59E-12	55.07	8.09E-11	38.91	7.74E-11	38.96	9.71E-13	38.94	7.34E-11
38.63	9.13E-12	38.68	3.36E-11	54.39	6.02E-12	54.48	1.21E-11	38.62	7.74E-13	38.66	4.76E-13	38.52	2.94E-12	39.32	3.10E-11	39.13	8.51E-11	55.25	1.85E-11	55.39	1.07E-10	39.15	6.18E-11	39.20	9.47E-12	39.18	5.18E-11
38.86	6.66E-12	38.91	3.26E-11	54.71	8.27E-13	54.80	5.71E-12	38.85	9.38E-13	38.89	5.82E-13	38.75	2.85E-12	39.55	3.64E-11	39.36	7.74E-11	55.58	1.23E-11	55.72	8.32E-11	39.39	7.15E-11	39.44	8.82E-13	39.41	6.08E-11
39.09	1.24E-11	39.14	3.20E-11	55.03	4.72E-12	55.12	6.19E-12	39.07	6.53E-13	39.12	3.25E-12	38.98	4.80E-12	39.79	3.15E-11	39.59	7.24E-11	55.91	7.72E-12	56.05	1.06E-10	39.63	4.96E-11	39.67	5.05E-12	39.65	7.19E-11
39.32	7.09E-12	39.36	3.18E-11	55.35	6.44E-12	55.44	1.01E-11	39.30	5.06E-12	39.35	6.19E-12	39.21	9.17E-12	40.02	3.83E-11	39.83	7.65E-11	56.23	2.21E-11	56.38	8.69E-11	39.87	6.86E-11	39.92	5.48E-12	39.89	7.69E-11
39.55	4.09E-12	39.60	3.60E-11	55.67	7.80E-12	55.77	8.75E-12	39.54	5.23E-12	39.59	6.38E-13	39.44	6.86E-12	40.25	3.40E-11	40.06	7.05E-11	56.57	6.53E-12	56.71	8.85E-11	40.13	7.28E-11	40.17	2.95E-12	40.13	6.34E-11
39.78	6.97E-12	39.83	3.20E-11	56.00	7.76E-12	56.09	8.60E-12	39.77	5.81E-12	39.82	2.85E-12	39.68	3.95E-13	40.48	3.66E-11	40.30	8.11E-11	56.90	1.33E-11	57.04	8.83E-11	40.36	6.80E-11	40.41	4.88E-12	40.37	6.66E-11
40.02	5.36E-12	40.06	3.55E-11	56.32	1.01E-11	56.42	1.91E-11	40.01	4.24E-12	40.05	8.19E-13	39.92	2.58E-12	40.72	3.28E-11	40.53	8.83E-11	57.22	1.28E-11	57.36	8.79E-11	40.61	7.09E-11	40.65	7.32E-12	40.59	4.83E-11
40.25	5.79E-12	40.29	2.91E-11	56.64	2.75E-12	56.73	1.15E-11	40.24	3.86E-12	40.28	8.21E-13	40.15	5.45E-12	40.95	3.35E-11	40.77	7.32E-11	57.54	4.16E-12	57.68	7.30E-11	40.83	5.87E-11	40.88	8.24E-13	40.82	7.23E-11
40.49	6.45E-12	40.53	3.39E-11	56.96	3.54E-12	57.05	1.32E-11	40.47	7.44E-13	40.51	4.03E-12	40.38	5.16E-12	41.18	3.90E-11	41.00	7.92E-11	57.86	7.56E-12	58.01	9.68E-11	41.06	7.84E-11	41.11	3.05E-11	41.05	7.74E-11
40.73	4.95E-12	40.77	3.83E-11	57.28	6.76E-12	57.38	6.62E-12	40.70	3.13E-12	40.74	6.61E-13	40.60	5.09E-12	41.42	3.45E-11	41.23	8.43E-11	58.20	7.97E-13	58.34	8.56E-11	41.29	7.13E-11	41.34	3.56E-11	41.28	6.77E-11
40.96	6.84E-12	41.01	3.29E-11	57.61	3.14E-12	57.70	6.87E-12	40.93	8.17E-12	40.98	3.31E-13	40.84	8.51E-12	41.65	3.56E-11	41.46	8.14E-11	58.53	1.02E-11	58.67	8.48E-11	41.53	1.01E-10	41.57	4.29E-11	41.51	7.90E-11
41.20	1.49E-11	41.25	2.81E-11	57.93	4.57E-12	58.03	1.75E-11	41.16	4.16E-12	41.20	7.35E-12	41.07	4.05E-12	41.89	3.63E-11	41.70	8.82E-11	58.86	6.96E-12	59.00	9.22E-11	41.77	7.89E-11	41.82	3.88E-11	41.75	6.02E-11
41.43	7.66E-12	41.47	2.91E-11	58.26	2.98E-12	58.35	2.18E-11	41.39	5.81E-12	41.43	1.44E-11	41.30	9.10E-12	42.15	3.29E-11	41.94	9.23E-11	59.20	1.41E-11	59.33	1.12E-10	42.01	8.38E-11	42.06	4.25E-11	41.99	9.15E-11
41.66	8.60E-12	41.70	3.23E-11	58.58	5.10E-12	58.67	6.78E-12	41.62	1.07E-11	41.66	2.40E-11	41.52	1.24E-11	42.39	3.39E-11	42.20	1.37E-10	59.52	7.97E-12	59.66	8.97E-11	42.25	9.12E-11	42.30	3.55E-11	42.22	6.61E-11
41.88	7.00E-12	41.93	3.36E-11	58.91	3.35E-12	59.00	1.09E-11	41.86	2.59E-11	41.91	2.57E-11	41.75	3.22E-11	42.64	3.57E-11	42.43	1.23E-10	59.86	1.62E-11	60.00	1.16E-10	42.49	1.23E-10	42.54	7.54E-11	42.45	6.48E-11
42.11	1.01E-12	42.16	3.85E-11	59.23	9.13E-12	59.33	9.31E-13	42.09	3.11E-11	42.14	3.43E-11	42.00	3.44E-11	42.87	3.05E-11	42.68	1.44E-10	60.19	2.19E-12	60.33	1.10E-10	42.73	8.01E-11	42.77	4.23E-11	42.68	6.14E-11
42.34	6.03E-12	42.39	3.09E-11	59.57	1.55E-12	59.66	6.45E-12	42.32	4.05E-11	42.37	2.77E-11	42.23	3.84E-11	43.12	3.70E-11	42.92	1.58E-10					42.97	8.04E-11	43.01	6.97E-11	42.91	8.99E-11
42.58	8.94E-12	42.62	3.33E-11	59.89	2.93E-12	59.98	8.90E-12	42.55	3.22E-11	42.59	4.73E-11	42.46	3.88E-11	43.36	3.86E-11	43.16	1.98E-10					43.21	1.03E-10	43.25	8.35E-11	43.15	6.47E-11
42.82	6.94E-12	42.86	3.13E-11	60.21	4.25E-12	60.30	1.43E-11	42.77	5.23E-11	42.82	6.89E-11	42.68	7.36E-11	43.59	3.33E-11	43.40	2.25E-10					43.44	1.40E-10	43.48	6.81E-11	43.38	7.07E-11
43.06	2.09E-11	43.10	3.54E-11					43.00	3.51E-11	43.05	5.38E-11	42.91	5.66E-11	43.83	3.72E-11	43.63	2.45E-10					43.68	1.69E-10	43.73	9.77E-11	43.61	6.36E-11
43.29	1.84E-11	43.34	3.27E-11					43.24	5.27E-11	43.28	6.92E-11	43.14	8.85E-11	44.06	3.63E-11	43.87	2.51E-10					43.91	1.49E-10	43.96	6.88E-11	43.83	7.82E-11
43.52	6.89E-12	43.56	3.27E-11					43.46	4.37E-11	43.51	8.56E-11	43.37	9.30E-11	44.30	3.62E-11	44.11	2.35E-10					44.15	1.64E-10	44.20	8.33E-11	44.08	7.00E-11
43.75	1.24E-11	43.79	3.09E-11					43.69	5.81E-11	43.74	8.07E-11	43.60	8.53E-11	44.54	3.63E-11	44.35	2.58E-10					44.39	1.57E-10	44.44	7.71E-11	44.31	9.37E-11
43.98	9.41E-12	44.02	3.15E-11					43.93	7.75E-11	43.98	1.01E-10	43.83	8.80E-11	44.77	3.12E-11	44.58	2.53E-10					44.62	1.72E-10	44.67	5.11E-11	44.55	6.73E-11
44.20	8.92E-12	44.25	2.90E-11					44.16	7.22E-11	44.20	9.53E-11	44.07	9.60E-11	45.01	3.57E-11	44.82	2.65E-10					44.86	1.52E-10	44.90	5.08E-11	44.77	6.20E-11
44.43	8.91E-12	44.48	3.08E-11					44.38	8.00E-11	44.43	8.28E-11	44.29	1.30E-10	45.24	3.54E-11	45.05	1.99E-10					45.09	1.62E-10	45.13	1.99E-11	45.00	5.86E-11
44.66	9.39E-12	44.71	3.23E-11					44.61	8.08E-11	44.66	1.08E-10	44.52	1.48E-10	45.48	3.20E-11	45.29	2.28E-10					45.32	1.53E-10	45.36	2.98E-11	45.23	8.70E-11
44.89	9.76E-13	44.93	3.41E-11					44.84	8.89E-11	44.88	1.33E-10	44.75	1.45E-10	45.71	3.14E-11	45.52	2.01E-10					45.55	1.37E-10	45.60	2.38E-11	45.47	7.15E-11
45.12	1.71E-11	45.17	3.40E-11					45.07	7.83E-11	45.12	1.55E-10	44.98	1.50E-10	45.94	3.61E-11	45.75	1.68E-10					45.79	1.37E-10	45.84	1.74E-11	45.70	8.34E-11
45.36	8.98E-12	45.40	4.02E-11					45.32	7.42E-11	45.36	1.27E-10	45.21	1.66E-10	46.17	3.56E-11	45.98	1.65E-10					46.02	9.10E-11	46.07	5.02E-12	45.94	7.65E-11
45.59	7.02E-12	45.63	3.01E-11					45.55	9.95E-11	45.59	9.43E-11	45.45	1.44E-10	46.40	3.82E-11	46.21	1.94E-10					46.26	1.06E-10	46.31	6.73E-13	46.18	6.48E-11
45.81	5.49E-12	45.86	3.33E-11					45.77	7.58E-11	45.82	1.85E-10	45.68	1.95E-10	46.64	3.41E-11	46.45	1.66E-10					46.50	9.76E-11	46.54	5.79E-12	46.41	7.49E-11
46.04	9.70E-12	46.09	3.68E-11					46.00	9.01E-11	46.05	1.42E-10	45.91	1.82E-10	46.87	3.55E-11	46.68	1.47E-10					46.74	8.52E-11	46.78	5.33E-12	46.65	9.60E-11
46.28	8.15E-13	46.32	3.43E-11					46.23	1.12E-10	46.27	1.45E-10	46.14	2.06E-10	47.10	3.52E-11	46.91	1.52E-10					46.97	1.17E-10	47.02	8.11E-13	46.89	7.98E-11
46.51	1.61E-11	46.56	3.25E-11					46.45	1.29E-10	46.50	1.34E-10	46.36	2.00E-10	47.34	3.21E-11	47.15	1.24E-10					47.20	7.72E-11	47.24	6.40E-13	47.12	7.75E-11
46.75	5.01E-12	46.79	3.23E-11					46.69	1.16E-10	46.74	1.46E-10	46.59	1.54E-10	47.57	3.50E-11	47.38	1.10E-10					47.43	9.45E-11	47.48	9.38E-13	47.35	8.05E-11
46.97	9.57E-13	47.02	3.24E-11					46.93	9.69E-11	46.97	1.50E-10	46.83	2.03E-10	47.81	3.55E-11	47.61	1.29E-10					47.67	1.15E-10	47.71	7.36E-13	47.59	7.93E-11
47.20	5.47E-12	47.25	3.09E-11					47.15	8.38E-11	47.20	1.59E-10	47.06	1.51E-10	48.04	3.76E-11	47.85	1.12E-10					47.90	1.09E-10	47.95	3.28E-12	47.82	8.66E-11
47.43	3.56E-12	47.48	2.87E-11					47.38	7.51E-11	47.43	1.23E-10	47.29	1.69E-10	48.27	3.58E-11	48.08	9.91E-11					48.14	9.04E-11	48.18	2.93E-12	48.06	8.33E-11
47.68	2.29E-12	47.72	2.81E-11					47.62	6.86E-11	47.67	1.25E-10	47.52	1.35E-10	48.50	3.32E-11	48.32	1.05E-10					48.37	8.81E-11	48.41	4.23E-12	48.30	8.62E-11
47.91	8.55E-13	47.95	2.95E-11					47.85	4.96E-11	47.90	9.56E-11	47.76	1.40E-10	48.73	3.31E-11	48.55	1.07E-10					48.61	1.20E-10	48.66	8.32E-13	48.54	7.77E-11
48.14	5.76E-12	48.18	2.60E-11					48.10	6.02E-11	48.14	7.87E-11	47.99	1.37E-10	48.99	3.22E-11	48.78	9.38E-11					48.84	8.94E-11	48.89	7.82E-13	48.77	8.24E-11
48.38	1.50E-12	48.42	3.03E-11					48.32	4.72E-11	48.37	8.11E-11	48.23	1.07E-10	49.22	3.34E-11	49.03	9.08E-11					49.08	8.24E-11	49.13	9.25E-13	49.00	7.79E-11
48.61	8.69E-12	48.65	3.42E-11					48.55	4.88E-11	48.60	8.16E-11	48.46	1.04E-10	49.45	3.56E-11	49.26	9.37E-11					49.32	9.04E-11	49.36	3.80E-12	49.23	8.20E-11
48.83	4.99E-12	48.88	3.08E-11					48.78	4.59E-11	48.82	6.30E-11	48.69	7.33E-11	49.68	3.31E-11	49.49	1.42E-10					49.56	1.18E-10	49.60	7.89E-13	49.46	6.73E-11
49.06	6.95E-12	49.11	3.36E-11					49.00	3.79E-11	49.05	4.81E-11	48.92	7.76E-11	49.91	3.33E-11	49.72	1.11E-10					49.80	8.03E-11	49.84	2.49E-12	49.69	8.14E-11
49.30	3.74E-12	49.34	3.44E-11					49.24	2.77E-11	49.28	2.64E-11	49.14	4.50E-11	50.14	3.75E-11	49.95	1.05E-10					50.03	1.06E-10	50.08	2.49E-12	49.93	8.23E-11
49.53	4.59E-12	49.57	3.30E-11					49.46	1.27E-11	49.51	3.24E-11	49.37	4.51E-11	50.37	3.25E-11	50.19	8.72E-11					50.26	8.82E-11	50.30	3.08E-12	50.17	8.98E-11
49.76	3.07E-12	49.82	3.34E-11					49.69	1.06E-11	49.74	3.65E-11	49.60	4.31E-11	50.60	3.36E-11	50.42	1.05E-10					50.49	1.26E-10	50.54	1.79E-12	50.41	8.25E-11
50.00	2.20E-12	50.04	3.49E-11					49.92	1.35E-11	49.97	2.02E-11	49.83	2.09E-11	50.84	3.22E-11	50.65	9.77E-11					50.73	8.64E-11	50.77	3.60E-12	50.63	7.40E-11
50.23	7.14E-12	50.27	3.51E-11					50.16	8.76E-12	50.21	2.44E-11	50.06	9.63E-12	51.07	2.95E-11	50.88	9.55E-11					50.97	9.02E-11	51.02	4.83E-13	50.86	8.55E-11
50.45	4.42E-12	50.50	3.62E-11					50.39	1.27E-11	50.43	2.00E-11	50.30	7.92E-12	51.32	2.90E-11	51.11	9.24E-11					51.20	8.34E-11	51.25	3.66E-12	51.10	8.11E-11
50.68	5.43E-12	50.73	3.39E-11					50.62	1.68E-11	50.66	5.82E-12	50.52	6.99E-12	51.55	3.68E-11	51.36	9.86E-11					51.43	8.11E-11	51.48	5.70E-13	51.34	6.08E-11
50.92	5.59E-12	50.97	3.12E-11					50.85	6.16E-12	50.90	9.25E-12	50.76	8.02E-12	51.80	3.03E-11	51.59	8.18E-11					51.67	8.72E-11	51.72	8.42E-13	51.57	6.05E-11
51.16	7.28E-12	51.20	3.15E-11					51.08	1.07E-11	51.13	3.93E-12	50.99	2.50E-11	52.05	3.50E-11	51.84	9.97E-11					51.90	1.05E-10	51.95	1.10E-12	51.80	7.83E-11
51.39	3.16E-12	51.43	3.14E-11					51.31	2.23E-11	51.36	9.18E-12	51.22	5.88E-12	52.28	3.46E-11	52.10	7.73E-11					52.14	5.75E-11	52.18	2.22E-12	52.03	7.52E-11
51.61	6.17E-12	51.66	2.95E-11					51.54	5.91E-12	51.59	4.54E-12	51.45	2.18E-12	52.51	3.18E-11	52.33	9.31E-11					52.37	7.17E-11	52.42	4.53E-12	52.26	8.76E-11
51.84	6.91E-12	51.89	3.05E-11					51.77	3.36E-12	51.82	7.01E-12	51.68	6.37E-12	52.74	3.39E-11	52.56	1.12E-10					52.60	6.98E-11	52.65	3.92E-13	52.50	8.10E-11
52.07	7.71E-12	52.12	3.19E-11					52.01	1.47E-11	52.06	2.95E-12	51.91	7.28E-12	52.98	3.79E-11	52.79	9.80E-11					52.83	1.01E-10	52.87	3.44E-13	52.73	7.58E-11
52.30	4.02E-12	52.34	3.55E-11					52.24	3.67E-12	52.28	2.60E-12	52.15	5.59E-12	53.21	2.94E-11	53.02	1.39E-10					53.07	9.78E-11	53.11	5.98E-13	52.96	8.19E-11
52.53	4.28E-12	52.57	2.91E-11					52.47	8.83E-12	52.51	3.12E-12	52.37	4.19E-12	53.44	3.11E-11	53.25	1.15E-10					53.29	8.80E-11	53.34	2.72E-13	53.19	9.81E-11
52.77	9.60E-13	52.81	3.26E-11					52.69	4.36E-12	52.74	3.74E-12	52.60	3.56E-12	53.67	3.27E-11	53.49	7.97E-11					53.54	8.90E-11	53.59	4.84E-13	53.43	7.78E-11
53.00	1.92E-12	53.05	3.21E-11					52.92	1.49E-11	52.97	3.57E-12	52.83	9.64E-13	53.90	3.91E-11	53.72	9.26E-11					53.77	8.30E-11	53.81	2.79E-13	53.66	7.59E-11
53.23	1.60E-12	53.28	3.22E-11					53.15	4.27E-12	53.20	6.49E-12	53.06	7.34E-13	54.14	3.05E-11	53.95	1.10E-10					54.00	6.30E-11	54.04	1.09E-12	53.92	8.54E-11
53.46	3.29E-12	53.51	3.07E-11					53.39	8.12E-12	53.43	3.41E-12	53.29	3.42E-12	54.38	3.45E-11	54.19	7.89E-11					54.23	1.03E-10	54.27	3.71E-12	54.15	7.56E-11
53.71	6.48E-13	53.75	2.78E-11					53.62	6.39E-12	53.67	2.60E-12	53.53	1.96E-12	54.62	3.92E-11	54.43	1.13E-10					54.46	9.50E-11	54.50	2.59E-13	54.39	8.52E-11
53.93	8.92E-13	53.98	3.65E-11					53.85	3.76E-12	53.90	9.43E-13	53.76	7.95E-13	54.85	3.47E-11	54.66	8.95E-11					54.69	9.84E-11	54.73	2.81E-13	54.62	8.91E-11
54.16	3.64E-12	54.21	3.08E-11					54.08	8.07E-12	54.13	2.24E-12	53.99	7.16E-12	55.09	3.23E-11	54.89	1.16E-10					54.93	1.06E-10	54.97	2.41E-12	54.87	6.85E-11
54.40	2.88E-12	54.45	2.94E-11					54.31	1.01E-11	54.36	1.70E-12	54.22	7.75E-13	55.32	3.14E-11	55.13	8.58E-11					55.17	1.08E-10	55.22	8.24E-12	55.11	8.97E-11
54.63	5.96E-12	54.67	3.75E-11					54.54	5.99E-12	54.59	6.43E-13	54.45	9.17E-13	55.55	3.25E-11	55.37	8.44E-11					55.40	7.16E-11	55.45	5.87E-12	55.34	1.10E-10
54.86	9.04E-13	54.90	2.97E-11					54.77	3.12E-12	54.82	6.24E-12	54.68	4.31E-12	55.80	3.44E-11	55.60	1.06E-10					55.64	1.06E-10	55.68	8.43E-13	55.56	9.15E-11
55.09	3.82E-12	55.13	3.49E-11					55.00	5.58E-12	55.05	6.69E-13	54.91	8.21E-13	56.03	3.67E-11	55.84	1.57E-10					55.87	8.02E-11	55.92	5.05E-12	55.79	1.05E-10
55.32	2.42E-12	55.37	3.04E-11					55.24	6.26E-12	55.28	1.93E-12	55.14	1.33E-12	56.26	3.55E-11	56.07	9.77E-11					56.12	1.07E-10	56.16	3.73E-12	56.02	7.43E-11
55.55	1.35E-11	55.59	3.16E-11					55.47	4.92E-12	55.51	4.77E-12	55.37	7.02E-12	56.49	3.11E-11	56.31	1.12E-10					56.34	9.86E-11	56.39	3.98E-12	56.25	8.97E-11
55.78	3.87E-12	55.82	3.18E-11					55.70	5.98E-12	55.74	4.22E-12	55.61	3.85E-12	56.72	3.51E-11	56.54	9.99E-11					56.57	8.88E-11	56.62	6.73E-13	56.48	8.82E-11
56.00	3.50E-12	56.05	3.29E-11					55.93	2.43E-12	55.98	6.57E-12	55.84	2.80E-12	56.95	3.20E-11	56.77	1.04E-10					56.80	9.20E-11	56.84	3.81E-13	56.72	9.05E-11
56.23	4.49E-12	56.28	3.43E-11					56.16	4.86E-12	56.21	5.09E-12	56.07	2.55E-13	57.19	3.10E-11	57.00	7.39E-11					57.04	1.17E-10	57.09	2.07E-12	56.95	1.07E-10
56.46	7.08E-13	56.51	3.24E-11					56.39	8.10E-12	56.44	8.06E-12	56.30	6.22E-12	57.42	3.14E-11	57.23	1.30E-10					57.28	1.03E-10	57.33	3.76E-12	57.17	8.90E-11
56.69	4.50E-12	56.73	2.88E-11					56.62	1.20E-11	56.67	4.56E-12	56.53	6.18E-13	57.67	3.34E-11	57.47	7.82E-11					57.51	1.11E-10	57.55	4.54E-12	57.40	8.04E-11
56.92	2.59E-12	56.96	2.55E-11					56.86	7.07E-12	56.90	7.84E-13	56.76	5.17E-12	57.90	3.25E-11	57.71	9.07E-11					57.75	7.04E-11	57.79	2.75E-12	57.63	8.60E-11
57.14	1.77E-12	57.19	2.93E-11					57.09	4.77E-12	57.13	2.04E-12	57.00	4.21E-12	58.13	4.08E-11	57.95	1.22E-10					57.98	8.85E-11	58.03	3.17E-12	57.87	7.82E-11
57.37	2.48E-12	57.42	3.14E-11					57.32	6.05E-12	57.36	5.50E-12	57.23	8.93E-13	58.36	3.24E-11	58.18	9.56E-11					58.21	9.34E-11	58.26	3.90E-12	58.10	8.40E-11
57.60	2.96E-12	57.65	3.20E-11					57.55	1.79E-12	57.59	2.51E-12	57.45	7.81E-13	58.60	3.56E-11	58.41	8.74E-11					58.44	8.66E-11	58.49	2.35E-12	58.33	8.75E-11
57.83	2.75E-12	57.88	2.79E-11					57.77	5.12E-12	57.82	4.54E-13	57.68	5.34E-12	58.83	3.23E-11	58.64	1.17E-10					58.68	1.05E-10	58.72	9.42E-13	58.56	8.60E-11
58.06	8.24E-13	58.11	2.92E-11					58.00	1.44E-11	58.05	2.71E-12	57.91	3.38E-12	59.08	2.89E-11	58.88	8.24E-11					58.91	1.04E-10	58.96	1.05E-12	58.79	7.78E-11
58.29	3.24E-12	58.33	2.77E-11					58.24	6.62E-12	58.28	4.17E-12	58.14	4.55E-12	59.33	3.23E-11	59.13	1.06E-10					59.14	1.09E-10	59.19	6.35E-13	59.03	1.07E-10
58.52	5.07E-12	58.56	3.16E-11					58.46	7.13E-12	58.51	4.08E-13	58.37	6.99E-12	59.56	3.41E-11	59.38	8.49E-11					59.39	1.05E-10	59.43	6.72E-13	59.26	8.11E-11
58.76	1.24E-12	58.80	2.89E-11					58.71	5.49E-12	58.75	8.57E-12	58.61	5.68E-13	59.80	3.41E-11	59.61	9.55E-11					59.62	8.95E-11	59.66	1.85E-12	59.49	9.26E-11
59.00	6.49E-12	59.04	2.78E-11					58.94	6.77E-12	58.98	7.60E-13	58.85	6.33E-12	60.03	3.33E-11	59.84	1.08E-10					59.84	8.23E-11	59.89	7.01E-13	59.72	1.20E-10
59.23	8.20E-13	59.27	3.41E-11					59.17	8.67E-12	59.22	2.90E-12	59.07	4.34E-12			60.07	1.33E-10					60.07	9.48E-11	60.12	5.77E-13	59.95	1.07E-10
59.45	8.92E-12	59.50	3.14E-11					59.41	9.13E-13	59.45	4.99E-13	59.31	5.62E-12													60.18	9.53E-11
59.68	3.91E-12	59.73	2.92E-11					59.64	1.46E-11	59.68	4.49E-12	59.55	1.55E-12
59.92	8.45E-13	59.97	2.93E-11					59.88	1.78E-11	59.92	6.67E-12	59.77	5.15E-12
60.15	4.35E-12	60.20	3.23E-11					60.11	2.66E-12	60.15	7.94E-13	60.01	3.89E-12
