# Supplementary material for: A new method to quantify particulate sodium and potassium salts (nitrate, chloride, and sulfate) by thermal desorption aerosol mass spectrometry
Source: Copernicus journal article supplement (doi:10.5194/amt-2021-228), 2021-08-26
Supplement: Supplementary file 1 [file amt-2021-228-supplement.zip › Fig 3.csv]

MassLoading_SN_Na	IntegratedIonSignal_SN_mz23	MassLoading_SN_NO3	IntegratedIonSignal_SN_mz30	MassLoading_SC_Na	IntegratedIonSignal_SC_mz23	MassLoading_SC_Cl	IntegratedIonSignal_SC_mz36	MassLoading_SS_Na	IntegratedIonSignal_SS_mz23	MassLoading_SS_SO4	IntegratedIonSignal_SS_mz48	MassLoading_PN_NO3	IntegratedIonSignal_PN_mz30	MassLoading_PN_K	IntegratedIonSignal_PN_mz39	MassLoading_PC_Cl	IntegratedIonSignal_PC_mz36	MassLoading_PC_K	IntegratedIonSignal_PC_mz39	MassLoading_PS_K	IntegratedIonSignal_PS_mz39	MassLoading_PS_SO4	IntegratedIonSignal_PS_mz48
1.80	35.3	4.86	254	3.16	52.5	4.80	72.6	2.52	20.7	5.25	31.1	6.24	379	3.92	112	2.55	49.5	2.85	65.0	4.54	21.1	3.69	11.3
0	0.333	0	6.04	0	0.0495	0	0.540	0	0.631	0	0.223	0	6.87	0	19.7	0	0.505	0	12.5	0	6.50	0	0.156
2.66	56.6	7.17	353	1.93	28.2	2.93	42.2	3.64	30.1	7.59	45.9	9.07	543	5.70	179	3.62	63.6	4.03	99.3	6.29	27.4	5.11	16.0
0	0.788	0	10.2	0	-0.691	0	0.612	0	0.654	0	0.140	0	10.4	0	25.4	0	0.202	0	16.3	0	7.96	0	0.214
3.13	67.6	8.44	433	3.90	65.8	5.94	80.2	4.48	37.2	9.34	56.2	12.2	704	7.70	249	4.74	80.5	5.28	138	7.62	31.3	6.19	19.6
0	0.198	0	10.4	0	0.544	0	-0.159	0	0.878	0	0.281	0	13.1	0	26.3	0	0.815	0	23.6	0	7.66	0	0.0705
2.95	62.4	7.95	396	1.62	23.6	2.47	29.7	3.21	24.5	6.69	34.4	5.46	372	3.43	134	2.73	50.9	3.04	73.0	5.15	34.3	4.18	20.3
0	0.079	0	4.93	0	-0.277	0	0.151	0	0.648	0	0.113	0	10.6	0	24.7	0	-0.235	0	10.6	0	10.7	0	0.112
4.40	102	11.9	574	2.57	37.8	3.91	44.5	4.94	36.8	10.3	54.4	7.85	500	4.94	179	3.77	63.2	4.20	103	7.67	42.5	6.23	28.5
0	0.105	0	1.71	0	0.0323	0	0.220	0	0.0941	0	0.293	0	7.82	0	28.2	0	0.350	0	19.5	0	7.75	0	0.232
5.64	134	15.2	732	3.24	50.6	4.94	52.9	6.50	50.1	13.6	71.2	8.95	595	5.63	213	4.55	75.7	5.07	126	9.98	55.3	8.11	37.5
0	0.446	0	13.1	0	-0.688	0	0.653	0	1.14	0	0.255	0	8.48	0	29.9	0	0.322	0	21.3	0	11.1	0	0.244
2.04	52.1	5.50	305	2.08	31.6	3.17	33.1	5.62	50.8	11.7	68.0	2.26	142	1.42	48.1	1.25	21.0	1.39	35.1	5.11	35.3	4.15	30.8
0	0.155	0	0.296	0	-0.571	0	0.120	0	-0.0865	0	0.195	0	8.20	0	12.8	0	0.190	0	11.7	0	6.08	0	0.136
3.43	85.9	9.25	452	3.00	45.3	4.57	43.1	8.37	79.1	17.5	102	2.92	175	1.83	57.1	1.83	29.4	2.04	50.8	7.17	53.4	5.83	38.9
0	-0.536	0	10.4	0	0.816	0	-0.267	0	0.342	0	0.149	0	7.91	0	11.4	0	0.279	0	11.3	0	3.46	0	0.256
4.35	114	11.7	595	3.78	58.8	5.75	54.6	12.4	107	25.8	137	4.58	272	2.88	93.6	2.36	35.1	2.63	62.4	9.61	67.9	7.81	54.4
0	-0.102	0	1.06	0	0.446	0	1.08	0	0.659	0	0.283	0	5.38	0	13.9	0	0.569	0	18.5	0	6.92	0	0.144
