# Supplementary material for: A new method to quantify particulate sodium and potassium salts (nitrate, chloride, and sulfate) by thermal desorption aerosol mass spectrometry
Source: Copernicus journal article supplement (doi:10.5194/amt-2021-228), 2021-08-26
Supplement: Supplementary file 1 [file amt-2021-228-supplement.zip › Fig 4.csv]

ElapsedTime_mz23_SN+SC+SS_No.1	IonSignal_mz23_SN+SC+SS_No.1	ElapsedTime_mz30_SN+SC+SS_No.1	IonSignal_mz30_SN+SC+SS_No.1	ElapsedTime_mz36_SN+SC+SS_No.1	IonSignal_mz36_SN+SC+SS_No.1	ElapsedTime_mz48_SN+SC+SS_No.1	IonSignal_mz48_SN+SC+SS_No.1	ElapsedTime_mz23_SN+SC+SS_No.2	IonSignal_mz23_SN+SC+SS_No.2	ElapsedTime_mz30_SN+SC+SS_No.2	IonSignal_mz30_SN+SC+SS_No.2	ElapsedTime_mz36_SN+SC+SS_No.2	IonSignal_mz36_SN+SC+SS_No.2	ElapsedTime_mz48_SN+SC+SS_No.2	IonSignal_mz48_SN+SC+SS_No.2	ElapsedTime_mz23_SN+SC+SS_No.3	IonSignal_mz23_SN+SC+SS_No.3	ElapsedTime_mz30_SN+SC+SS_No.3	IonSignal_mz30_SN+SC+SS_No.3	ElapsedTime_mz36_SN+SC+SS_No.3	IonSignal_mz36_SN+SC+SS_No.3	ElapsedTime_mz48_SN+SC+SS_No.3	IonSignal_mz48_SN+SC+SS_No.3	ElapsedTime_mz30_PN+PC+PS_No.1	IonSignal_mz30_PN+PC+PS_No.1	ElapsedTime_mz36_PN+PC+PS_No.1	IonSignal_mz36_PN+PC+PS_No.1	ElapsedTime_mz39_PN+PC+PS_No.1	IonSignal_mz39_PN+PC+PS_No.1	ElapsedTime_mz48_PN+PC+PS_No.1	IonSignal_mz48_PN+PC+PS_No.1	ElapsedTime_mz30_PN+PC+PS_No.2	IonSignal_mz30_PN+PC+PS_No.2	ElapsedTime_mz36_PN+PC+PS_No.2	IonSignal_mz36_PN+PC+PS_No.2	ElapsedTime_mz39_PN+PC+PS_No.2	IonSignal_mz39_PN+PC+PS_No.2	ElapsedTime_mz48_PN+PC+PS_No.2	IonSignal_mz48_PN+PC+PS_No.2	ElapsedTime_mz30_PN+PC+PS_No.3	IonSignal_mz30_PN+PC+PS_No.3	ElapsedTime_mz36_PN+PC+PS_No.3	IonSignal_mz36_PN+PC+PS_No.3	ElapsedTime_mz39_PN+PC+PS_No.3	IonSignal_mz39_PN+PC+PS_No.3	ElapsedTime_mz48_PN+PC+PS_No.3	IonSignal_mz48_PN+PC+PS_No.3
-1.179	2.11E-12	-1.129	3.71E-11	-1.084	5.29E-14	-1.038	-3.23E-13	-1.188	2.51E-12	-1.143	3.25E-11	-1.097	9.82E-13	-1.052	9.56E-14	-1.184	1.71E-12	-1.138	3.24E-11	-1.092	8.82E-13	-1.047	3.33E-13	-1.291	3.34E-11	-1.245	1.83E-12	-1.200	2.75E-11	-1.154	3.06E-13	-1.241	3.37E-11	-1.196	3.85E-13	-1.150	3.84E-11	-1.105	2.71E-13	-1.231	3.31E-11	-1.186	8.63E-13	-1.140	3.10E-11	-1.094	1.21E-13
-0.8960	2.77E-12	-0.8510	3.06E-11	-0.8050	-3.51E-13	-0.7600	1.06E-14	-0.9049	3.95E-12	-0.8590	2.98E-11	-0.8140	9.16E-13	-0.7689	1.28E-13	-0.8989	9.70E-13	-0.8501	3.25E-11	-0.8049	2.27E-12	-0.7590	1.29E-12	-0.9580	3.39E-11	-0.9120	1.51E-12	-0.8670	3.69E-11	-0.8210	3.73E-13	-0.9641	4.45E-11	-0.9191	5.28E-13	-0.8740	2.80E-11	-0.8280	1.18E-13	-0.9519	3.90E-11	-0.9070	7.64E-13	-0.8621	2.74E-11	-0.8159	3.97E-13
-0.6190	1.06E-12	-0.5740	2.78E-11	-0.5290	7.69E-14	-0.4830	-6.14E-14	-0.6270	2.87E-12	-0.5809	3.36E-11	-0.5360	9.08E-13	-0.4900	8.10E-14	-0.6211	2.75E-12	-0.5750	3.21E-11	-0.5291	8.90E-13	-0.4841	6.29E-13	-0.6760	3.58E-11	-0.6310	1.24E-13	-0.5850	1.08E-11	-0.5400	1.94E-13	-0.6870	3.99E-11	-0.6421	3.97E-13	-0.5961	3.84E-11	-0.5510	2.55E-13	-0.6699	3.57E-11	-0.6250	2.40E-12	-0.5801	3.02E-11	-0.5339	1.80E-13
-0.3360	3.27E-12	-0.2870	3.33E-11	-0.2410	2.40E-12	-0.1960	-2.77E-13	-0.3500	4.55E-12	-0.3049	2.91E-11	-0.2589	2.11E-12	-0.2130	2.81E-13	-0.3391	3.70E-12	-0.2930	3.51E-11	-0.2480	9.87E-13	-0.2031	2.40E-13	-0.3960	3.84E-11	-0.3510	3.41E-13	-0.3050	3.95E-11	-0.2600	6.12E-13	-0.4121	3.89E-11	-0.3661	1.53E-12	-0.3210	3.21E-11	-0.2750	4.57E-13	-0.3870	3.54E-11	-0.3420	3.81E-12	-0.2969	3.89E-11	-0.2490	8.89E-13
-0.05701	1.54E-12	-0.01099	3.25E-11	0.03400	3.00E-12	0.08002	-2.96E-13	-0.07300	8.53E-13	-0.02600	3.25E-11	0.01904	9.92E-13	0.06506	2.12E-13	-0.02905	1.88E-12	0.01685	2.97E-11	0.06201	8.26E-13	0.1069	2.78E-13	-0.1160	3.60E-11	-0.07101	-5.62E-14	-0.02301	1.24E-11	0.02301	3.10E-13	-0.1300	3.75E-11	-0.08411	2.34E-12	-0.03906	1.21E-11	0.005981	4.16E-13	-0.1099	3.40E-11	-0.06396	3.52E-12	-0.01904	3.37E-11	0.02710	2.04E-13
0.2210	3.24E-12	0.2660	2.93E-11	0.3110	2.59E-12	0.3570	2.04E-13	0.2120	2.83E-12	0.2600	3.28E-11	0.3051	1.49E-12	0.3511	3.58E-14	0.2600	6.18E-13	0.3049	3.42E-11	0.3511	2.39E-12	0.3960	6.18E-13	0.1680	3.28E-11	0.2130	2.81E-13	0.2590	2.94E-11	0.3040	2.54E-13	0.1489	3.96E-11	0.1940	2.77E-13	0.2400	2.19E-11	0.2849	4.57E-13	0.1821	3.63E-11	0.2271	9.44E-13	0.2729	2.54E-11	0.3181	1.36E-13
0.5000	1.46E-12	0.5450	3.21E-11	0.5910	4.43E-13	0.6360	7.06E-14	0.4890	1.09E-12	0.5341	3.31E-11	0.5801	1.46E-12	0.6250	1.26E-12	0.5378	2.21E-12	0.5830	3.01E-11	0.6289	8.74E-13	0.6741	3.10E-13	0.4620	3.36E-11	0.5080	2.01E-12	0.5570	1.17E-11	0.6020	5.84E-13	0.4369	3.69E-11	0.4819	1.17E-12	0.5280	1.19E-11	0.5750	1.01E-13	0.4609	3.75E-11	0.5071	7.82E-13	0.5520	2.92E-11	0.5969	7.72E-14
0.7760	1.55E-12	0.8210	3.10E-11	0.8660	-4.09E-13	0.9120	1.40E-13	0.7671	3.81E-12	0.8120	3.02E-11	0.8580	8.60E-13	0.9031	3.65E-13	0.8169	1.58E-12	0.8630	2.97E-11	0.9080	1.48E-12	0.9551	5.79E-13	0.7440	3.58E-11	0.7900	-4.20E-15	0.8350	2.46E-11	0.8810	2.15E-13	0.7179	3.82E-11	0.7639	5.52E-13	0.8090	2.75E-11	0.8550	1.48E-13	0.7441	3.18E-11	0.7900	1.41E-12	0.8359	3.01E-11	0.8811	7.72E-13
1.050	3.30E-12	1.096	2.94E-11	1.141	3.59E-12	1.187	-1.00E-13	1.048	1.83E-12	1.094	3.26E-11	1.139	8.99E-13	1.185	4.17E-13	1.099	7.22E-13	1.145	3.11E-11	1.190	8.23E-13	1.236	1.73E-12	1.020	3.42E-11	1.065	1.45E-13	1.111	2.32E-11	1.156	7.25E-13	0.997	3.85E-11	1.043	2.75E-12	1.088	4.08E-11	1.135	4.06E-13	1.020	3.89E-11	1.066	2.37E-12	1.114	3.14E-11	1.159	3.73E-13
1.327	1.51E-12	1.373	3.83E-11	1.418	4.72E-12	1.465	3.60E-13	1.328	2.33E-12	1.373	3.55E-11	1.419	9.97E-13	1.464	1.06E-12	1.381	1.99E-12	1.427	3.45E-11	1.472	9.24E-13	1.518	2.31E-12	1.296	3.53E-11	1.342	1.67E-13	1.387	2.46E-11	1.436	2.65E-13	1.292	3.68E-11	1.338	4.52E-12	1.387	4.07E-11	1.434	4.83E-13	1.296	3.70E-11	1.341	2.62E-12	1.387	2.88E-11	1.432	8.95E-14
1.608	1.62E-12	1.653	3.51E-11	1.699	9.98E-12	1.745	-1.27E-13	1.631	8.97E-13	1.677	3.48E-11	1.723	6.57E-12	1.770	1.09E-14	1.657	7.62E-13	1.702	3.39E-11	1.748	4.70E-12	1.793	4.48E-13	1.584	3.43E-11	1.629	4.40E-13	1.674	3.13E-11	1.721	2.90E-12	1.591	3.85E-11	1.637	5.39E-13	1.682	3.80E-11	1.727	6.79E-13	1.574	3.66E-11	1.620	4.96E-12	1.665	2.78E-11	1.711	1.52E-12
1.908	4.67E-12	1.954	3.35E-11	1.999	4.68E-12	2.047	-2.48E-13	1.917	2.08E-12	1.962	3.67E-11	2.008	8.98E-12	2.053	7.33E-14	1.932	8.28E-13	1.978	3.82E-11	2.023	4.76E-12	2.072	5.49E-13	1.863	3.92E-11	1.909	2.92E-12	1.954	2.18E-11	2.000	4.59E-13	1.869	3.94E-11	1.914	1.50E-12	1.960	3.34E-11	2.005	2.68E-12	1.852	3.58E-11	1.898	3.10E-12	1.944	2.56E-11	1.989	3.38E-13
2.192	5.78E-12	2.238	3.11E-11	2.283	-9.81E-14	2.329	2.03E-13	2.196	3.32E-12	2.241	3.28E-11	2.287	2.54E-12	2.334	3.21E-12	2.239	2.96E-12	2.284	3.27E-11	2.329	3.06E-12	2.375	6.53E-13	2.158	3.91E-11	2.204	4.82E-12	2.250	3.15E-11	2.295	1.86E-12	2.145	3.65E-11	2.190	2.45E-12	2.237	3.36E-11	2.282	2.01E-13	2.128	3.92E-11	2.174	4.57E-12	2.219	3.25E-11	2.265	5.96E-14
2.468	1.47E-12	2.514	3.34E-11	2.559	1.43E-13	2.605	1.45E-12	2.526	2.87E-12	2.571	3.57E-11	2.617	3.73E-12	2.662	4.22E-13	2.516	1.57E-12	2.562	3.44E-11	2.608	9.45E-13	2.653	5.51E-13	2.438	4.00E-11	2.483	2.12E-13	2.529	2.21E-11	2.577	3.22E-13	2.428	3.93E-11	2.473	4.30E-12	2.521	3.50E-11	2.567	3.71E-13	2.421	4.07E-11	2.466	3.85E-12	2.512	3.92E-11	2.557	2.33E-14
2.746	1.47E-12	2.791	3.45E-11	2.837	3.63E-12	2.882	1.59E-12	2.802	1.18E-12	2.850	3.47E-11	2.896	1.34E-12	2.941	3.34E-13	2.792	8.04E-13	2.837	3.36E-11	2.883	9.76E-13	2.929	1.00E-12	2.722	3.34E-11	2.767	5.71E-13	2.813	2.65E-11	2.858	3.68E-13	2.709	4.25E-11	2.755	8.10E-13	2.801	2.67E-11	2.846	1.36E-13	2.698	4.34E-11	2.744	3.15E-12	2.789	2.96E-11	2.834	2.46E-13
3.025	1.30E-12	3.071	3.61E-11	3.116	1.03E-12	3.166	1.41E-12	3.083	2.53E-12	3.128	3.51E-11	3.174	9.31E-13	3.221	3.75E-13	3.072	3.62E-12	3.118	3.38E-11	3.163	7.92E-13	3.209	3.61E-13	3.000	4.08E-11	3.046	6.75E-13	3.091	1.28E-11	3.136	3.15E-13	2.989	4.28E-11	3.034	2.95E-12	3.084	2.79E-11	3.129	1.51E-12	2.974	3.76E-11	3.019	8.33E-12	3.065	3.26E-11	3.110	3.50E-13
3.315	1.60E-12	3.361	3.78E-11	3.406	-1.12E-15	3.452	-2.90E-13	3.360	1.73E-12	3.406	3.72E-11	3.451	3.42E-12	3.497	1.25E-12	3.350	2.57E-12	3.400	3.49E-11	3.445	2.54E-12	3.491	3.25E-13	3.282	3.82E-11	3.328	4.90E-13	3.373	3.89E-11	3.418	3.32E-13	3.269	3.99E-11	3.315	1.03E-11	3.360	1.60E-11	3.406	3.30E-13	3.247	4.17E-11	3.292	8.68E-12	3.339	3.82E-11	3.384	1.14E-12
3.592	2.07E-12	3.637	3.41E-11	3.682	1.70E-12	3.737	-1.38E-15	3.639	1.50E-12	3.687	3.56E-11	3.733	9.48E-13	3.779	8.38E-14	3.636	6.60E-13	3.684	3.46E-11	3.730	1.31E-12	3.776	2.58E-13	3.581	3.56E-11	3.626	5.28E-12	3.672	2.59E-11	3.720	3.21E-12	3.549	4.56E-11	3.595	4.54E-12	3.642	2.63E-11	3.687	4.49E-12	3.527	3.98E-11	3.573	1.42E-11	3.619	3.86E-11	3.665	2.22E-12
3.879	1.09E-12	3.924	3.30E-11	3.970	1.05E-12	4.015	1.06E-13	3.925	3.65E-12	3.971	3.55E-11	4.016	1.35E-12	4.065	1.02E-12	3.919	5.90E-13	3.965	3.50E-11	4.010	3.61E-12	4.056	3.55E-13	3.857	4.10E-11	3.903	4.58E-13	3.952	2.57E-11	3.998	2.83E-13	3.829	3.76E-11	3.875	3.87E-12	3.920	2.37E-11	3.965	1.25E-13	3.806	3.84E-11	3.852	4.40E-12	3.897	3.05E-11	3.943	1.11E-12
4.156	1.33E-12	4.201	3.17E-11	4.247	5.59E-14	4.292	-2.52E-13	4.206	1.00E-12	4.251	3.17E-11	4.297	7.73E-13	4.342	2.99E-13	4.201	8.38E-13	4.246	3.61E-11	4.292	4.54E-12	4.338	4.18E-13	4.150	4.34E-11	4.196	5.87E-13	4.241	3.12E-11	4.287	6.51E-13	4.109	3.57E-11	4.154	4.71E-12	4.199	3.21E-11	4.245	4.24E-13	4.082	4.14E-11	4.127	1.11E-12	4.173	3.79E-11	4.218	2.73E-13
4.431	3.71E-12	4.479	3.29E-11	4.524	5.33E-12	4.570	-1.64E-13	4.485	4.20E-12	4.530	3.83E-11	4.576	6.00E-12	4.623	1.06E-13	4.481	2.75E-12	4.526	3.43E-11	4.572	9.60E-13	4.617	3.61E-13	4.430	4.50E-11	4.475	8.12E-12	4.524	3.40E-11	4.572	4.86E-13	4.393	3.47E-11	4.439	4.88E-12	4.489	2.85E-11	4.534	1.35E-12	4.359	4.32E-11	4.405	1.09E-12	4.450	3.19E-11	4.498	2.75E-13
4.709	1.90E-12	4.755	3.38E-11	4.801	1.86E-13	4.847	2.95E-13	4.764	2.37E-12	4.813	3.32E-11	4.858	1.72E-12	4.903	1.26E-13	4.761	5.08E-13	4.810	3.41E-11	4.856	2.18E-12	4.901	4.47E-13	4.710	3.72E-11	4.756	7.18E-12	4.801	3.47E-11	4.848	3.84E-13	4.674	3.81E-11	4.719	3.78E-12	4.765	3.79E-11	4.810	2.21E-12	4.637	3.76E-11	4.683	3.82E-12	4.728	4.33E-11	4.774	4.98E-13
4.990	2.37E-12	5.035	2.96E-11	5.081	-2.11E-13	5.126	-2.59E-13	5.045	1.81E-12	5.090	3.53E-11	5.135	9.06E-13	5.181	4.63E-13	5.041	8.09E-13	5.086	3.66E-11	5.132	1.87E-12	5.177	3.24E-13	5.000	3.20E-11	5.045	5.11E-12	5.097	4.06E-11	5.142	5.29E-13	4.958	3.64E-11	5.004	4.29E-12	5.053	4.16E-11	5.098	4.69E-13	4.932	3.58E-11	4.978	4.13E-12	5.023	3.33E-11	5.069	2.42E-13
5.284	1.17E-12	5.330	3.68E-11	5.375	1.09E-12	5.421	-1.17E-13	5.321	2.42E-12	5.366	3.12E-11	5.412	1.02E-12	5.457	6.92E-14	5.340	2.08E-12	5.386	3.35E-11	5.432	2.49E-12	5.477	2.56E-13	5.282	3.78E-11	5.328	8.12E-12	5.374	4.87E-11	5.422	2.43E-13	5.239	4.33E-11	5.285	1.48E-12	5.330	3.38E-11	5.375	3.69E-13	5.217	3.67E-11	5.262	2.29E-12	5.308	4.29E-11	5.353	3.38E-13
5.563	3.50E-12	5.608	3.66E-11	5.654	5.77E-12	5.700	1.63E-13	5.614	1.35E-12	5.659	3.60E-11	5.705	5.02E-12	5.750	2.41E-13	5.622	3.09E-12	5.667	3.44E-11	5.713	9.91E-13	5.758	3.97E-13	5.561	3.53E-11	5.607	3.32E-12	5.652	2.68E-11	5.698	2.10E-12	5.515	4.45E-11	5.561	7.51E-13	5.606	3.31E-11	5.655	2.71E-12	5.494	3.70E-11	5.540	3.67E-12	5.586	3.46E-11	5.631	1.36E-12
5.840	1.39E-12	5.885	3.64E-11	5.931	1.74E-13	5.976	4.78E-13	5.894	1.00E-12	5.939	3.64E-11	5.985	8.81E-13	6.030	3.45E-13	5.899	3.78E-12	5.944	4.08E-11	5.989	2.85E-12	6.036	5.73E-13	5.840	3.30E-11	5.885	5.65E-12	5.931	4.69E-11	5.977	6.21E-13	5.801	4.27E-11	5.847	1.18E-11	5.898	3.92E-11	5.944	3.61E-13	5.772	4.00E-11	5.818	3.64E-12	5.863	4.25E-11	5.909	8.65E-14
6.114	5.22E-12	6.160	3.54E-11	6.206	-6.51E-14	6.251	-2.85E-13	6.189	1.17E-12	6.234	3.98E-11	6.279	3.41E-12	6.327	3.37E-13	6.175	2.54E-12	6.220	4.20E-11	6.266	3.35E-12	6.312	1.86E-12	6.120	4.44E-11	6.165	6.08E-12	6.211	5.96E-11	6.256	3.27E-13	6.083	4.31E-11	6.128	6.07E-13	6.174	3.23E-11	6.219	1.82E-13	6.054	4.57E-11	6.099	1.16E-11	6.145	3.99E-11	6.190	2.21E-13
6.411	1.56E-12	6.457	4.26E-11	6.502	2.26E-12	6.548	-2.32E-13	6.467	3.72E-12	6.513	3.94E-11	6.558	1.01E-12	6.604	1.11E-13	6.457	5.48E-12	6.503	4.33E-11	6.551	2.74E-12	6.596	3.67E-13	6.396	4.17E-11	6.442	7.32E-12	6.487	5.21E-11	6.533	1.06E-12	6.364	5.49E-11	6.415	4.98E-12	6.461	3.90E-11	6.506	3.03E-13	6.330	4.89E-11	6.376	4.23E-12	6.421	5.12E-11	6.467	2.73E-13
6.686	1.00E-11	6.731	4.97E-11	6.777	4.65E-12	6.831	1.43E-13	6.747	7.12E-12	6.793	4.30E-11	6.839	3.57E-12	6.884	1.97E-13	6.737	9.77E-12	6.783	4.80E-11	6.828	1.68E-12	6.875	5.05E-13	6.677	5.73E-11	6.722	4.49E-12	6.771	5.10E-11	6.816	3.68E-13	6.646	6.57E-11	6.692	3.99E-12	6.737	5.36E-11	6.782	2.82E-13	6.603	6.10E-11	6.661	2.28E-12	6.707	6.04E-11	6.752	2.66E-13
6.974	2.20E-11	7.019	6.04E-11	7.065	1.58E-13	7.110	-1.84E-13	7.024	1.29E-11	7.071	5.10E-11	7.116	9.83E-13	7.161	9.34E-13	7.022	1.58E-11	7.067	6.45E-11	7.126	9.52E-13	7.171	4.50E-13	6.959	6.35E-11	7.004	8.28E-12	7.052	5.23E-11	7.097	8.66E-13	6.921	7.69E-11	6.966	8.00E-13	7.014	6.65E-11	7.060	5.33E-13	6.894	7.60E-11	6.955	6.45E-12	7.001	8.40E-11	7.047	1.62E-12
7.254	3.44E-11	7.302	7.50E-11	7.347	2.98E-12	7.396	-1.88E-13	7.307	2.33E-11	7.353	5.77E-11	7.400	5.92E-12	7.446	4.61E-13	7.312	3.67E-11	7.357	7.30E-11	7.412	5.00E-12	7.458	2.04E-12	7.237	8.59E-11	7.283	6.42E-12	7.332	7.88E-11	7.377	3.48E-13	7.212	1.01E-10	7.257	5.38E-12	7.303	7.94E-11	7.349	2.08E-13	7.194	1.04E-10	7.239	5.08E-12	7.284	9.75E-11	7.330	2.18E-12
7.536	1.09E-11	7.582	9.05E-11	7.643	5.11E-12	7.688	3.77E-12	7.586	3.30E-11	7.631	7.43E-11	7.681	3.85E-12	7.727	1.92E-13	7.603	4.14E-11	7.649	9.44E-11	7.694	4.20E-12	7.740	9.27E-13	7.530	1.11E-10	7.589	4.76E-12	7.634	1.14E-10	7.680	4.77E-13	7.499	1.39E-10	7.544	5.40E-12	7.593	1.19E-10	7.638	1.58E-12	7.482	1.30E-10	7.527	7.39E-12	7.576	1.35E-10	7.621	1.28E-12
7.833	4.74E-11	7.879	1.08E-10	7.935	6.34E-12	7.981	-1.63E-13	7.876	4.44E-11	7.922	9.87E-11	7.970	1.31E-12	8.021	1.69E-13	7.888	7.50E-11	7.933	1.26E-10	7.979	4.10E-12	8.024	2.75E-12	7.818	1.38E-10	7.864	4.48E-12	7.911	1.43E-10	7.957	1.88E-12	7.777	1.70E-10	7.822	1.05E-11	7.868	1.22E-10	7.913	2.59E-13	7.775	1.90E-10	7.820	5.11E-12	7.871	1.75E-10	7.917	2.11E-12
8.126	6.03E-11	8.171	1.45E-10	8.217	2.22E-13	8.262	1.60E-13	8.164	7.00E-11	8.209	1.25E-10	8.255	5.62E-12	8.300	1.27E-12	8.183	9.00E-11	8.228	1.51E-10	8.274	3.49E-12	8.321	3.68E-13	8.109	1.97E-10	8.154	6.49E-13	8.200	1.46E-10	8.245	3.88E-13	8.066	2.16E-10	8.111	1.09E-11	8.157	2.03E-10	8.203	1.00E-12	8.053	2.30E-10	8.099	1.64E-11	8.144	2.26E-10	8.190	3.07E-13
8.404	1.22E-10	8.449	1.78E-10	8.495	5.23E-12	8.540	9.76E-14	8.445	6.87E-11	8.491	1.68E-10	8.536	1.02E-12	8.582	1.66E-12	8.461	1.19E-10	8.506	1.87E-10	8.551	1.06E-12	8.597	4.90E-13	8.390	2.34E-10	8.435	4.64E-13	8.481	1.98E-10	8.526	6.21E-13	8.339	2.30E-10	8.384	5.94E-12	8.430	1.72E-10	8.475	5.19E-13	8.341	2.76E-10	8.386	1.49E-11	8.432	2.08E-10	8.478	1.39E-12
8.676	1.09E-10	8.722	2.32E-10	8.767	3.48E-12	8.813	1.17E-12	8.720	1.26E-10	8.766	2.04E-10	8.811	6.68E-12	8.857	9.82E-13	8.737	1.36E-10	8.783	2.29E-10	8.828	1.11E-11	8.876	4.80E-13	8.664	2.73E-10	8.709	7.51E-12	8.755	1.53E-10	8.800	2.83E-12	8.619	2.30E-10	8.665	2.50E-11	8.710	1.53E-10	8.755	2.32E-13	8.616	2.88E-10	8.661	2.32E-11	8.707	2.38E-10	8.752	5.10E-13
8.954	9.82E-11	8.999	2.33E-10	9.045	8.30E-12	9.092	-1.59E-13	8.996	1.08E-10	9.041	2.24E-10	9.087	2.60E-12	9.132	3.09E-13	9.013	1.39E-10	9.058	2.37E-10	9.103	5.76E-12	9.149	5.05E-13	8.937	2.77E-10	8.982	1.58E-11	9.028	2.15E-10	9.073	6.84E-13	8.892	1.74E-10	8.937	1.30E-11	8.982	1.40E-10	9.028	1.18E-12	8.904	2.31E-10	8.949	2.87E-11	8.995	2.01E-10	9.041	9.71E-13
9.256	9.06E-11	9.302	2.05E-10	9.347	7.19E-12	9.394	1.79E-12	9.282	1.02E-10	9.328	2.20E-10	9.373	3.49E-12	9.419	2.97E-12	9.285	1.27E-10	9.330	2.11E-10	9.376	1.31E-11	9.421	5.41E-13	9.224	2.09E-10	9.270	1.32E-11	9.318	1.46E-10	9.363	3.20E-13	9.168	1.23E-10	9.213	1.02E-11	9.259	1.42E-10	9.304	5.77E-13	9.184	1.55E-10	9.229	2.16E-11	9.275	2.05E-10	9.320	1.59E-12
9.537	9.41E-11	9.582	1.60E-10	9.628	1.85E-11	9.673	3.38E-12	9.575	9.23E-11	9.621	1.62E-10	9.666	2.01E-11	9.715	1.48E-12	9.566	9.37E-11	9.612	1.45E-10	9.657	1.21E-11	9.702	2.65E-13	9.504	1.54E-10	9.549	3.53E-11	9.595	1.46E-10	9.640	1.85E-12	9.442	8.26E-11	9.488	4.43E-11	9.533	1.65E-10	9.579	1.03E-12	9.466	9.89E-11	9.511	4.10E-11	9.557	1.96E-10	9.602	4.04E-13
9.818	8.32E-11	9.863	1.13E-10	9.908	2.36E-11	9.954	2.64E-13	9.855	6.37E-11	9.900	1.24E-10	9.946	9.54E-12	9.991	3.37E-12	9.844	7.08E-11	9.890	9.86E-11	9.935	1.36E-11	9.980	1.23E-12	9.786	1.02E-10	9.834	2.90E-11	9.880	1.58E-10	9.925	5.06E-13	9.719	6.35E-11	9.776	5.66E-11	9.822	1.62E-10	9.867	1.42E-12	9.739	7.13E-11	9.790	6.09E-11	9.836	2.43E-10	9.881	1.91E-13
10.11	7.56E-11	10.15	7.45E-11	10.21	3.48E-11	10.25	1.22E-13	10.15	6.60E-11	10.19	7.43E-11	10.25	2.67E-11	10.30	3.73E-13	10.13	8.47E-11	10.17	6.50E-11	10.22	2.82E-11	10.26	4.31E-13	10.07	7.25E-11	10.11	6.22E-11	10.16	1.96E-10	10.20	3.64E-13	10.01	6.15E-11	10.05	7.82E-11	10.10	2.27E-10	10.14	4.31E-13	10.03	5.63E-11	10.07	1.01E-10	10.12	4.02E-10	10.16	3.36E-13
10.39	7.78E-11	10.43	6.41E-11	10.48	3.48E-11	10.53	-1.12E-13	10.44	7.84E-11	10.48	6.36E-11	10.53	3.90E-11	10.58	4.36E-13	10.41	1.10E-10	10.45	5.33E-11	10.50	3.24E-11	10.55	5.38E-13	10.35	6.26E-11	10.39	6.79E-11	10.44	3.08E-10	10.48	7.38E-13	10.29	4.91E-11	10.33	9.33E-11	10.38	3.35E-10	10.42	3.61E-13	10.30	5.66E-11	10.35	9.96E-11	10.39	4.73E-10	10.45	3.88E-13
10.67	1.25E-10	10.71	4.49E-11	10.76	6.06E-11	10.80	-8.84E-14	10.72	1.12E-10	10.76	4.90E-11	10.81	4.41E-11	10.85	4.50E-13	10.69	1.36E-10	10.74	4.52E-11	10.78	5.98E-11	10.83	4.62E-13	10.62	5.60E-11	10.67	9.14E-11	10.71	3.34E-10	10.76	6.10E-13	10.57	4.54E-11	10.62	9.04E-11	10.66	3.66E-10	10.71	1.81E-12	10.59	4.90E-11	10.64	1.28E-10	10.68	4.89E-10	10.73	6.49E-13
10.95	1.84E-10	10.99	3.62E-11	11.04	6.96E-11	11.08	9.26E-14	11.00	1.55E-10	11.04	4.60E-11	11.09	6.98E-11	11.13	1.05E-13	10.97	2.15E-10	11.01	4.37E-11	11.06	8.92E-11	11.11	2.75E-13	10.90	4.85E-11	10.95	1.52E-10	11.00	4.44E-10	11.04	5.77E-13	10.85	4.33E-11	10.89	1.12E-10	10.94	3.66E-10	10.99	2.93E-12	10.87	4.36E-11	10.92	1.39E-10	10.96	5.03E-10	11.01	2.28E-13
11.22	1.91E-10	11.27	4.26E-11	11.31	1.17E-10	11.36	1.19E-12	11.28	2.12E-10	11.32	4.13E-11	11.37	9.01E-11	11.41	7.89E-14	11.25	2.85E-10	11.30	4.32E-11	11.34	1.09E-10	11.39	5.02E-13	11.18	5.19E-11	11.23	1.62E-10	11.27	4.00E-10	11.32	2.15E-12	11.13	4.78E-11	11.17	1.17E-10	11.22	3.03E-10	11.26	1.04E-12	11.15	4.16E-11	11.20	1.50E-10	11.25	3.72E-10	11.29	1.90E-13
11.50	2.91E-10	11.54	3.88E-11	11.59	1.18E-10	11.63	4.26E-14	11.55	2.51E-10	11.60	3.83E-11	11.64	1.05E-10	11.69	4.32E-13	11.53	3.67E-10	11.58	3.98E-11	11.63	1.13E-10	11.67	4.58E-13	11.46	4.44E-11	11.50	1.67E-10	11.55	3.44E-10	11.59	2.22E-13	11.40	4.44E-11	11.45	1.11E-10	11.49	2.61E-10	11.54	2.78E-13	11.43	4.10E-11	11.48	9.84E-11	11.52	3.44E-10	11.57	3.09E-13
11.78	3.32E-10	11.83	3.99E-11	11.87	1.61E-10	11.92	-5.74E-14	11.83	3.24E-10	11.88	4.12E-11	11.92	1.28E-10	11.97	2.42E-13	11.82	3.32E-10	11.86	3.59E-11	11.91	1.77E-10	11.96	5.49E-13	11.74	4.38E-11	11.79	1.14E-10	11.83	2.91E-10	11.88	6.13E-13	11.68	3.77E-11	11.72	7.54E-11	11.77	2.21E-10	11.81	2.76E-12	11.73	3.74E-11	11.77	1.07E-10	11.82	2.53E-10	11.86	2.08E-13
12.06	3.54E-10	12.10	4.17E-11	12.15	1.99E-10	12.20	-1.15E-13	12.11	3.29E-10	12.15	3.98E-11	12.20	1.37E-10	12.24	2.29E-12	12.10	3.16E-10	12.14	3.83E-11	12.19	1.52E-10	12.23	4.03E-13	12.03	4.48E-11	12.08	9.20E-11	12.12	2.16E-10	12.17	9.55E-13	11.97	3.59E-11	12.02	6.11E-11	12.06	1.63E-10	12.11	1.44E-13	12.01	4.03E-11	12.05	8.84E-11	12.10	2.00E-10	12.14	2.38E-13
12.33	3.02E-10	12.38	3.41E-11	12.42	1.77E-10	12.47	2.48E-13	12.39	2.49E-10	12.43	3.74E-11	12.48	1.38E-10	12.53	4.77E-13	12.38	2.52E-10	12.42	3.94E-11	12.47	1.14E-10	12.51	4.22E-13	12.31	3.26E-11	12.35	1.12E-10	12.40	2.31E-10	12.44	8.12E-13	12.25	3.79E-11	12.29	5.76E-11	12.34	1.60E-10	12.38	1.57E-12	12.29	3.75E-11	12.33	5.26E-11	12.38	1.68E-10	12.42	3.91E-14
12.61	2.31E-10	12.66	3.73E-11	12.70	1.66E-10	12.75	2.13E-13	12.66	2.22E-10	12.71	4.08E-11	12.76	1.19E-10	12.80	1.60E-13	12.65	1.77E-10	12.70	3.57E-11	12.74	9.83E-11	12.79	5.29E-13	12.58	3.68E-11	12.63	8.29E-11	12.67	2.00E-10	12.72	5.67E-13	12.57	3.79E-11	12.62	5.99E-11	12.66	1.25E-10	12.71	1.89E-13	12.57	3.80E-11	12.61	5.91E-11	12.66	1.50E-10	12.70	1.48E-12
12.89	1.53E-10	12.94	2.87E-11	12.98	1.15E-10	13.03	-4.64E-14	12.94	1.35E-10	12.99	3.64E-11	13.03	8.32E-11	13.08	7.60E-13	12.93	9.75E-11	12.98	3.90E-11	13.02	8.33E-11	13.07	2.21E-12	12.86	3.60E-11	12.91	7.35E-11	12.95	1.36E-10	13.00	3.92E-13	12.85	3.75E-11	12.90	5.31E-11	12.94	1.20E-10	12.99	4.32E-13	12.85	3.66E-11	12.90	6.44E-11	12.94	1.32E-10	12.99	1.07E-12
13.17	1.00E-10	13.21	3.56E-11	13.26	7.54E-11	13.30	-1.78E-13	13.22	8.88E-11	13.27	3.37E-11	13.31	7.35E-11	13.36	2.67E-13	13.21	6.81E-11	13.26	3.57E-11	13.30	4.54E-11	13.35	3.31E-13	13.14	3.20E-11	13.19	6.83E-11	13.23	9.98E-11	13.28	1.84E-12	13.13	3.77E-11	13.17	5.48E-11	13.22	1.30E-10	13.26	2.40E-13	13.13	3.37E-11	13.18	5.03E-11	13.22	1.51E-10	13.27	3.56E-13
13.44	7.25E-11	13.49	3.47E-11	13.54	8.02E-11	13.58	-7.38E-15	13.50	4.90E-11	13.54	3.74E-11	13.59	6.34E-11	13.64	2.36E-13	13.49	4.71E-11	13.54	3.59E-11	13.58	5.45E-11	13.63	1.24E-12	13.42	3.97E-11	13.47	8.11E-11	13.51	1.33E-10	13.56	3.89E-13	13.41	3.64E-11	13.45	5.22E-11	13.50	9.16E-11	13.54	2.06E-12	13.41	3.68E-11	13.46	4.54E-11	13.50	1.29E-10	13.55	3.47E-13
13.72	7.38E-11	13.76	3.19E-11	13.81	8.82E-11	13.85	-1.39E-13	13.78	5.38E-11	13.82	3.56E-11	13.87	5.04E-11	13.91	4.03E-13	13.77	5.11E-11	13.81	3.46E-11	13.86	4.49E-11	13.90	3.87E-13	13.70	3.21E-11	13.75	5.25E-11	13.79	1.12E-10	13.84	1.42E-12	13.68	3.88E-11	13.73	4.08E-11	13.77	1.02E-10	13.82	1.84E-13	13.69	3.89E-11	13.74	4.55E-11	13.78	1.07E-10	13.83	2.04E-13
14.00	4.66E-11	14.04	3.52E-11	14.09	7.47E-11	14.13	-2.07E-13	14.06	4.46E-11	14.10	3.29E-11	14.15	4.60E-11	14.19	1.46E-13	14.05	3.80E-11	14.09	3.49E-11	14.14	3.84E-11	14.18	1.17E-12	13.98	3.52E-11	14.02	5.14E-11	14.07	1.42E-10	14.11	6.93E-13	13.96	3.52E-11	14.01	3.57E-11	14.05	1.14E-10	14.10	3.80E-13	13.97	3.50E-11	14.01	3.92E-11	14.06	1.20E-10	14.10	1.32E-13
14.27	4.69E-11	14.32	3.33E-11	14.36	6.07E-11	14.41	1.31E-12	14.33	4.16E-11	14.38	3.73E-11	14.42	4.31E-11	14.47	1.12E-13	14.32	3.18E-11	14.37	3.47E-11	14.41	4.33E-11	14.46	3.46E-13	14.25	3.45E-11	14.30	4.80E-11	14.34	1.00E-10	14.39	2.25E-12	14.24	3.30E-11	14.28	4.51E-11	14.33	7.31E-11	14.37	4.76E-13	14.25	3.82E-11	14.29	3.50E-11	14.34	1.17E-10	14.39	1.22E-12
14.55	4.62E-11	14.60	3.36E-11	14.64	5.73E-11	14.69	-1.84E-13	14.61	3.90E-11	14.66	3.78E-11	14.70	3.87E-11	14.75	1.48E-13	14.60	3.03E-11	14.65	2.98E-11	14.70	3.03E-11	14.74	1.91E-12	14.53	3.87E-11	14.58	5.27E-11	14.62	1.25E-10	14.67	1.14E-12	14.51	3.91E-11	14.56	4.35E-11	14.60	9.23E-11	14.65	3.38E-13	14.53	3.56E-11	14.58	3.77E-11	14.62	1.09E-10	14.67	1.49E-13
14.83	3.86E-11	14.88	3.90E-11	14.92	3.69E-11	14.97	1.44E-12	14.92	2.85E-11	14.96	3.55E-11	15.01	3.88E-11	15.05	1.20E-12	14.89	2.64E-11	14.93	3.35E-11	14.98	4.51E-11	15.02	5.34E-13	14.83	3.14E-11	14.88	4.49E-11	14.92	1.19E-10	14.97	3.16E-13	14.79	3.54E-11	14.84	3.60E-11	14.88	8.09E-11	14.93	5.30E-13	14.81	3.93E-11	14.85	3.56E-11	14.90	1.11E-10	14.94	2.35E-13
15.11	3.59E-11	15.16	2.96E-11	15.20	4.69E-11	15.25	1.40E-13	15.21	3.73E-11	15.25	3.50E-11	15.30	3.67E-11	15.34	2.25E-13	15.17	3.11E-11	15.21	3.88E-11	15.26	2.92E-11	15.30	2.26E-12	15.12	2.87E-11	15.17	4.10E-11	15.21	1.07E-10	15.26	3.30E-12	15.07	3.82E-11	15.11	3.73E-11	15.16	9.74E-11	15.20	2.24E-13	15.08	3.38E-11	15.13	4.06E-11	15.18	1.06E-10	15.22	3.91E-13
15.39	4.06E-11	15.43	3.71E-11	15.48	4.52E-11	15.52	-1.93E-13	15.49	3.20E-11	15.54	3.41E-11	15.58	3.60E-11	15.63	4.86E-13	15.44	3.33E-11	15.49	3.46E-11	15.53	4.16E-11	15.58	1.38E-12	15.40	3.53E-11	15.44	4.57E-11	15.49	1.11E-10	15.54	2.33E-13	15.35	3.67E-11	15.39	3.16E-11	15.44	9.09E-11	15.49	3.08E-13	15.36	3.67E-11	15.41	3.55E-11	15.45	9.75E-11	15.50	2.29E-12
15.66	4.05E-11	15.70	3.05E-11	15.75	4.53E-11	15.80	1.21E-13	15.78	1.98E-11	15.83	3.41E-11	15.88	4.14E-11	15.92	2.39E-13	15.72	2.44E-11	15.77	3.45E-11	15.81	3.20E-11	15.86	5.53E-13	15.67	2.90E-11	15.72	5.28E-11	15.77	9.25E-11	15.81	2.99E-13	15.62	3.44E-11	15.67	3.38E-11	15.71	1.00E-10	15.76	2.60E-13	15.64	3.65E-11	15.69	4.74E-11	15.74	1.03E-10	15.78	1.60E-13
15.94	3.03E-11	15.98	3.32E-11	16.03	5.01E-11	16.08	3.10E-13	16.06	2.42E-11	16.11	3.43E-11	16.15	4.05E-11	16.20	8.85E-13	16.01	2.01E-11	16.05	3.23E-11	16.10	2.98E-11	16.14	1.34E-12	15.95	3.72E-11	16.00	3.91E-11	16.04	8.65E-11	16.09	2.84E-13	15.91	3.46E-11	15.95	2.81E-11	16.00	8.88E-11	16.04	1.96E-13	15.92	3.50E-11	15.96	3.99E-11	16.01	1.02E-10	16.05	3.40E-13
16.22	4.91E-11	16.26	2.84E-11	16.31	5.59E-11	16.35	2.77E-13	16.34	4.00E-11	16.39	3.48E-11	16.43	3.42E-11	16.48	1.79E-13	16.28	2.79E-11	16.33	3.52E-11	16.38	3.59E-11	16.42	1.45E-12	16.23	3.27E-11	16.28	9.05E-12	16.32	8.80E-11	16.37	5.95E-13	16.19	3.38E-11	16.24	2.61E-11	16.28	6.84E-11	16.33	3.39E-12	16.20	3.41E-11	16.25	3.41E-11	16.29	9.99E-11	16.34	3.68E-13
16.50	5.45E-11	16.54	3.16E-11	16.59	3.72E-11	16.63	-2.16E-13	16.62	2.35E-11	16.66	3.13E-11	16.71	3.88E-11	16.75	1.82E-13	16.56	2.46E-11	16.61	3.46E-11	16.65	2.83E-11	16.70	1.49E-12	16.52	3.42E-11	16.56	4.01E-11	16.61	9.83E-11	16.65	7.28E-13	16.46	3.64E-11	16.51	3.17E-11	16.55	8.37E-11	16.60	6.26E-13	16.48	3.73E-11	16.53	4.19E-11	16.57	6.44E-11	16.62	4.09E-13
16.78	3.82E-11	16.82	3.28E-11	16.87	3.65E-11	16.91	3.64E-13	16.89	2.41E-11	16.94	3.06E-11	16.98	1.38E-11	17.03	2.72E-13	16.86	2.98E-11	16.90	3.09E-11	16.95	2.70E-11	16.99	7.35E-13	16.80	3.28E-11	16.84	5.00E-11	16.89	8.94E-11	16.93	2.46E-12	16.74	3.33E-11	16.78	2.22E-11	16.83	8.80E-11	16.88	4.05E-13	16.77	3.51E-11	16.81	3.31E-11	16.86	1.04E-10	16.91	3.33E-13
17.07	2.99E-11	17.12	3.62E-11	17.16	3.25E-11	17.21	2.85E-12	17.17	2.45E-11	17.22	3.09E-11	17.26	2.92E-11	17.31	2.01E-13	17.14	2.09E-11	17.18	3.17E-11	17.23	3.38E-11	17.27	4.13E-13	17.08	3.57E-11	17.12	3.23E-11	17.17	8.95E-11	17.21	3.69E-13	17.02	3.64E-11	17.06	3.37E-11	17.11	8.30E-11	17.16	3.39E-13	17.05	3.61E-11	17.09	3.10E-11	17.14	1.13E-10	17.19	1.05E-12
17.35	2.87E-11	17.39	3.33E-11	17.44	4.75E-11	17.48	1.91E-12	17.46	2.21E-11	17.50	3.40E-11	17.55	2.73E-11	17.59	2.72E-13	17.42	1.87E-11	17.46	3.42E-11	17.51	2.39E-11	17.55	1.82E-12	17.36	3.64E-11	17.40	3.72E-11	17.45	8.04E-11	17.49	3.28E-13	17.30	3.44E-11	17.34	3.14E-11	17.39	8.52E-11	17.43	1.35E-13	17.32	3.68E-11	17.37	2.52E-11	17.42	8.87E-11	17.46	3.98E-13
17.63	3.48E-11	17.67	2.93E-11	17.72	4.03E-11	17.76	7.16E-14	17.73	3.35E-11	17.78	3.27E-11	17.82	2.81E-11	17.87	4.20E-13	17.69	2.13E-11	17.74	3.10E-11	17.78	3.25E-11	17.83	2.39E-13	17.63	3.76E-11	17.68	4.67E-11	17.72	9.37E-11	17.77	6.89E-13	17.57	3.64E-11	17.62	2.56E-11	17.67	9.45E-11	17.71	4.28E-12	17.60	3.53E-11	17.65	3.77E-11	17.69	8.40E-11	17.74	1.70E-12
17.90	3.51E-11	17.95	3.46E-11	17.99	4.99E-11	18.04	-1.69E-13	18.01	2.45E-11	18.06	3.13E-11	18.10	2.51E-11	18.15	2.26E-13	17.97	2.48E-11	18.01	2.96E-11	18.06	2.45E-11	18.10	1.17E-12	17.91	3.25E-11	17.96	3.87E-11	18.00	1.03E-10	18.05	5.90E-13	17.86	3.34E-11	17.90	2.98E-11	17.95	7.39E-11	17.99	9.58E-13	17.88	3.85E-11	17.93	2.11E-11	17.97	8.58E-11	18.02	1.70E-13
18.18	3.99E-11	18.23	2.70E-11	18.27	3.99E-11	18.32	4.06E-14	18.29	3.29E-11	18.34	3.21E-11	18.38	2.05E-11	18.43	2.95E-13	18.25	2.29E-11	18.29	3.42E-11	18.34	2.37E-11	18.39	5.49E-13	18.19	3.14E-11	18.23	4.25E-11	18.28	7.93E-11	18.33	6.86E-13	18.14	3.29E-11	18.18	2.71E-11	18.23	8.66E-11	18.28	2.85E-13	18.16	3.47E-11	18.20	2.53E-11	18.25	9.52E-11	18.29	9.24E-13
18.46	3.78E-11	18.51	2.94E-11	18.55	3.44E-11	18.60	1.09E-12	18.57	2.82E-11	18.61	3.06E-11	18.66	2.44E-11	18.71	4.06E-13	18.53	1.30E-11	18.57	3.22E-11	18.62	1.96E-11	18.67	4.46E-13	18.47	3.82E-11	18.52	3.80E-11	18.56	9.65E-11	18.61	3.50E-13	18.41	3.49E-11	18.46	2.90E-11	18.50	8.02E-11	18.55	2.81E-13	18.44	3.63E-11	18.49	2.07E-11	18.53	8.11E-11	18.58	2.20E-13
18.74	3.05E-11	18.79	3.16E-11	18.83	2.05E-11	18.88	-1.72E-13	18.85	2.10E-11	18.89	2.98E-11	18.94	1.98E-11	18.98	1.93E-12	18.82	1.70E-11	18.87	3.15E-11	18.91	2.51E-11	18.96	1.38E-12	18.75	3.49E-11	18.79	4.60E-11	18.84	8.34E-11	18.88	3.41E-12	18.70	3.26E-11	18.74	2.52E-11	18.79	7.56E-11	18.83	3.43E-13	18.71	3.26E-11	18.76	2.51E-11	18.80	8.81E-11	18.85	2.00E-12
19.02	3.27E-11	19.06	2.84E-11	19.11	3.44E-11	19.16	8.66E-14	19.13	3.31E-11	19.17	3.09E-11	19.22	1.86E-11	19.26	1.85E-12	19.10	1.84E-11	19.14	3.23E-11	19.19	2.33E-11	19.23	1.99E-12	19.03	3.04E-11	19.07	3.56E-11	19.12	9.25E-11	19.16	9.45E-13	18.97	3.40E-11	19.02	1.48E-11	19.06	8.95E-11	19.11	1.14E-13	18.99	3.02E-11	19.04	1.99E-11	19.08	9.22E-11	19.13	4.32E-13
19.29	3.27E-11	19.34	2.78E-11	19.39	3.65E-11	19.43	1.52E-13	19.41	2.27E-11	19.45	3.23E-11	19.50	2.67E-11	19.54	4.29E-13	19.37	3.16E-11	19.42	2.95E-11	19.46	2.76E-11	19.51	1.81E-12	19.31	2.63E-11	19.35	4.43E-11	19.40	8.23E-11	19.45	1.05E-12	19.25	3.42E-11	19.29	2.29E-11	19.34	7.34E-11	19.38	2.06E-12	19.27	3.62E-11	19.31	2.35E-11	19.36	9.22E-11	19.41	2.41E-13
19.57	2.95E-11	19.62	2.89E-11	19.67	3.15E-11	19.71	3.98E-13	19.70	3.09E-11	19.74	2.95E-11	19.79	2.55E-11	19.84	4.80E-13	19.65	3.60E-11	19.70	3.03E-11	19.74	2.29E-11	19.79	6.23E-13	19.59	2.67E-11	19.63	2.18E-11	19.68	7.84E-11	19.72	2.11E-13	19.54	3.39E-11	19.58	1.76E-11	19.63	5.96E-11	19.67	3.10E-13	19.55	3.75E-11	19.60	2.10E-11	19.64	9.40E-11	19.69	3.00E-12
19.87	3.47E-11	19.92	3.26E-11	19.96	2.76E-11	20.01	8.36E-13	19.98	3.62E-11	20.03	3.07E-11	20.07	1.98E-11	20.12	2.06E-13	19.94	2.83E-11	19.98	3.07E-11	20.03	2.22E-11	20.07	6.42E-13	19.87	3.26E-11	19.92	2.69E-11	19.96	8.71E-11	20.01	2.62E-12	19.81	3.72E-11	19.86	1.87E-11	19.91	5.84E-11	19.95	3.41E-13	19.84	3.36E-11	19.88	2.80E-11	19.93	7.93E-11	19.98	2.90E-12
20.15	3.54E-11	20.19	3.37E-11	20.23	3.24E-11	20.28	-7.04E-14	20.26	2.69E-11	20.31	2.45E-11	20.35	1.93E-11	20.40	1.45E-12	20.22	2.29E-11	20.26	3.30E-11	20.31	1.49E-11	20.36	2.89E-13	20.15	3.36E-11	20.19	1.90E-11	20.24	9.10E-11	20.29	3.99E-12	20.09	2.97E-11	20.14	1.74E-11	20.18	6.91E-11	20.23	6.92E-13	20.12	3.32E-11	20.17	1.35E-11	20.21	9.05E-11	20.26	1.44E-12
20.42	3.78E-11	20.47	2.94E-11	20.52	4.51E-11	20.56	2.07E-13	20.54	3.66E-11	20.59	3.00E-11	20.63	2.11E-11	20.68	1.96E-12	20.51	1.79E-11	20.55	2.97E-11	20.60	2.69E-11	20.64	2.38E-12	20.42	3.42E-11	20.47	2.92E-11	20.51	7.15E-11	20.56	4.53E-13	20.39	3.12E-11	20.43	2.77E-11	20.48	8.30E-11	20.53	1.71E-13	20.40	3.49E-11	20.45	2.23E-11	20.50	8.81E-11	20.54	4.56E-12
20.70	3.19E-11	20.75	2.67E-11	20.79	3.70E-11	20.84	-1.88E-13	20.82	2.35E-11	20.87	2.78E-11	20.91	1.98E-11	20.96	2.64E-13	20.78	2.50E-11	20.83	2.95E-11	20.87	1.94E-11	20.92	3.18E-13	20.71	3.11E-11	20.75	1.78E-11	20.80	6.06E-11	20.84	4.94E-13	20.67	3.11E-11	20.71	1.94E-11	20.76	8.59E-11	20.81	3.29E-12	20.69	3.48E-11	20.74	1.96E-11	20.78	5.71E-11	20.83	6.43E-13
20.98	2.93E-11	21.03	2.98E-11	21.08	3.08E-11	21.13	-5.74E-14	21.12	2.82E-11	21.17	3.01E-11	21.21	1.84E-11	21.26	1.78E-12	21.06	3.05E-11	21.10	3.09E-11	21.15	2.18E-11	21.19	2.87E-13	20.98	3.40E-11	21.03	3.58E-11	21.07	8.19E-11	21.12	1.01E-12	20.95	3.25E-11	21.00	2.25E-11	21.04	8.16E-11	21.09	3.24E-12	20.97	3.19E-11	21.01	2.67E-11	21.06	9.22E-11	21.10	3.67E-12
21.28	3.00E-11	21.32	2.51E-11	21.37	7.09E-12	21.41	3.94E-13	21.40	3.08E-11	21.44	2.93E-11	21.49	6.84E-12	21.53	4.80E-13	21.34	3.24E-11	21.38	3.06E-11	21.43	1.64E-11	21.47	5.11E-13	21.26	3.52E-11	21.31	9.77E-12	21.35	7.29E-11	21.40	4.09E-12	21.23	3.19E-11	21.28	2.07E-11	21.33	5.69E-11	21.37	2.62E-12	21.25	3.43E-11	21.29	6.45E-12	21.34	7.82E-11	21.39	1.91E-12
21.56	5.36E-11	21.60	3.02E-11	21.65	2.60E-11	21.69	3.37E-13	21.70	2.89E-11	21.74	2.85E-11	21.79	2.94E-11	21.83	6.10E-13	21.63	3.17E-11	21.67	2.72E-11	21.72	1.29E-11	21.76	2.91E-13	21.55	3.39E-11	21.59	3.04E-11	21.64	8.78E-11	21.68	2.53E-12	21.52	3.33E-11	21.56	1.99E-11	21.61	7.33E-11	21.65	2.03E-12	21.53	3.38E-11	21.58	1.92E-11	21.62	8.23E-11	21.67	3.13E-12
21.84	5.19E-11	21.88	3.05E-11	21.93	2.74E-11	21.97	2.81E-12	21.98	2.36E-11	22.03	3.41E-11	22.07	2.11E-11	22.11	1.04E-12	21.91	1.75E-11	21.95	2.94E-11	22.00	2.50E-11	22.04	6.16E-13	21.83	3.29E-11	21.88	1.34E-11	21.92	5.55E-11	21.97	2.14E-12	21.80	2.91E-11	21.84	1.87E-11	21.89	5.76E-11	21.93	5.39E-13	21.81	3.77E-11	21.86	2.46E-11	21.91	7.47E-11	21.95	4.12E-13
22.13	3.13E-11	22.18	2.86E-11	22.22	9.48E-12	22.27	3.42E-12	22.27	2.80E-11	22.31	2.81E-11	22.36	2.58E-11	22.40	1.30E-13	22.18	2.98E-11	22.23	2.70E-11	22.27	1.62E-11	22.32	1.79E-12	22.12	3.05E-11	22.16	2.87E-11	22.21	7.18E-11	22.25	2.19E-12	22.07	3.36E-11	22.12	2.67E-11	22.17	5.99E-11	22.21	3.00E-13	22.10	3.25E-11	22.15	2.30E-11	22.19	7.11E-11	22.24	3.25E-12
22.42	2.28E-11	22.46	2.33E-11	22.51	8.49E-12	22.55	5.70E-12	22.55	2.61E-11	22.60	3.12E-11	22.64	1.40E-11	22.69	1.05E-12	22.46	3.37E-11	22.51	2.86E-11	22.55	1.11E-11	22.60	1.07E-12	22.39	3.68E-11	22.44	2.12E-11	22.49	8.14E-11	22.53	6.65E-13	22.35	3.24E-11	22.40	1.21E-11	22.44	6.95E-11	22.49	1.23E-11	22.37	3.17E-11	22.42	1.64E-11	22.46	7.47E-11	22.51	4.13E-12
22.70	3.28E-11	22.74	2.87E-11	22.79	2.74E-11	22.83	2.93E-13	22.83	2.60E-11	22.87	2.73E-11	22.92	1.26E-11	22.96	2.47E-13	22.74	2.46E-11	22.79	2.97E-11	22.84	2.02E-11	22.88	2.59E-12	22.68	2.56E-11	22.72	1.77E-11	22.77	8.17E-11	22.81	3.25E-12	22.63	3.46E-11	22.68	1.79E-11	22.72	7.66E-11	22.77	5.38E-12	22.65	3.37E-11	22.70	2.23E-11	22.74	6.15E-11	22.79	3.58E-12
22.97	3.85E-11	23.02	2.97E-11	23.06	1.97E-11	23.11	-3.51E-13	23.11	3.00E-11	23.15	2.72E-11	23.20	2.54E-11	23.24	3.29E-13	23.03	3.36E-11	23.07	2.83E-11	23.12	1.53E-11	23.17	9.43E-13	22.95	2.96E-11	23.00	2.89E-11	23.04	6.81E-11	23.09	3.15E-12	22.91	3.25E-11	22.96	1.51E-11	23.00	6.27E-11	23.05	3.59E-12	22.94	3.19E-11	22.98	1.91E-11	23.03	6.59E-11	23.07	3.49E-12
23.25	5.30E-11	23.30	2.73E-11	23.34	2.74E-11	23.39	3.05E-12	23.39	3.49E-11	23.43	2.87E-11	23.48	1.82E-11	23.53	4.62E-13	23.30	3.36E-11	23.35	3.24E-11	23.40	1.24E-11	23.44	2.25E-12	23.23	2.79E-11	23.28	2.97E-11	23.32	5.96E-11	23.37	2.76E-12	23.19	3.47E-11	23.23	1.84E-11	23.28	5.54E-11	23.33	4.39E-12	23.21	3.15E-11	23.26	5.23E-12	23.30	5.88E-11	23.35	5.20E-12
23.53	2.68E-11	23.58	2.65E-11	23.62	2.08E-11	23.67	6.66E-14	23.67	2.75E-11	23.72	2.71E-11	23.77	2.10E-11	23.81	4.78E-13	23.58	2.89E-11	23.63	3.18E-11	23.68	1.48E-11	23.72	1.64E-12	23.51	3.22E-11	23.55	2.19E-11	23.60	5.95E-11	23.65	7.91E-13	23.47	3.08E-11	23.51	1.94E-11	23.56	6.77E-11	23.60	7.27E-12	23.50	3.29E-11	23.54	1.85E-11	23.59	7.58E-11	23.64	7.63E-12
23.81	3.04E-11	23.85	2.66E-11	23.90	8.60E-12	23.95	1.19E-12	23.95	3.70E-11	24.00	3.21E-11	24.04	2.05E-11	24.09	1.99E-12	23.86	3.05E-11	23.91	2.89E-11	23.95	1.22E-11	24.00	6.45E-13	23.79	3.10E-11	23.83	2.60E-11	23.88	5.70E-11	23.93	5.20E-12	23.74	3.44E-11	23.79	1.76E-11	23.83	5.87E-11	23.88	3.76E-12	23.78	3.35E-11	23.83	1.12E-11	23.88	7.41E-11	23.92	4.62E-12
24.09	4.08E-11	24.13	2.41E-11	24.18	8.88E-12	24.23	2.29E-12	24.23	3.66E-11	24.28	2.87E-11	24.32	2.12E-11	24.37	2.41E-12	24.14	2.50E-11	24.19	2.81E-11	24.23	1.38E-11	24.28	4.89E-13	24.07	3.12E-11	24.12	9.61E-12	24.16	6.52E-11	24.21	3.26E-12	24.02	3.44E-11	24.06	1.84E-11	24.11	6.68E-11	24.16	1.11E-11	24.07	3.65E-11	24.12	1.95E-11	24.16	8.34E-11	24.21	1.07E-11
24.37	2.91E-11	24.42	2.53E-11	24.46	2.59E-11	24.51	3.87E-12	24.52	3.30E-11	24.56	2.96E-11	24.61	1.84E-11	24.66	2.72E-13	24.42	3.22E-11	24.47	3.25E-11	24.51	1.84E-11	24.56	5.13E-13	24.35	3.31E-11	24.40	1.71E-11	24.45	7.37E-11	24.49	9.93E-13	24.30	3.25E-11	24.34	5.67E-12	24.39	5.08E-11	24.44	7.50E-13	24.35	3.40E-11	24.40	2.49E-11	24.44	5.65E-11	24.49	1.69E-11
24.65	4.13E-11	24.69	2.42E-11	24.74	2.08E-11	24.79	4.49E-13	24.79	3.73E-11	24.84	2.93E-11	24.89	5.18E-12	24.93	6.31E-13	24.70	3.05E-11	24.75	2.88E-11	24.79	1.23E-11	24.84	5.59E-13	24.63	3.05E-11	24.68	1.94E-11	24.72	6.77E-11	24.77	5.45E-12	24.58	3.41E-11	24.62	1.58E-11	24.67	6.46E-11	24.71	7.48E-12	24.63	3.25E-11	24.68	2.33E-11	24.72	6.70E-11	24.77	1.19E-11
24.93	3.76E-11	24.97	2.70E-11	25.02	2.62E-11	25.07	3.61E-12	25.09	3.78E-11	25.13	2.80E-11	25.18	6.67E-12	25.23	4.85E-13	24.98	3.06E-11	25.03	2.87E-11	25.07	1.39E-11	25.12	4.01E-12	24.91	2.79E-11	24.95	8.76E-12	25.00	6.47E-11	25.05	1.88E-11	24.85	3.08E-11	24.90	6.61E-12	24.94	5.06E-11	24.99	5.80E-12	24.91	3.12E-11	24.95	6.57E-12	25.00	6.65E-11	25.04	1.33E-11
25.21	3.52E-11	25.25	2.69E-11	25.30	8.93E-12	25.34	4.26E-13	25.37	3.25E-11	25.41	2.57E-11	25.46	1.02E-11	25.51	2.28E-12	25.26	2.79E-11	25.31	2.92E-11	25.36	9.65E-12	25.40	6.63E-13	25.19	2.96E-11	25.23	7.72E-12	25.28	7.19E-11	25.32	6.48E-12	25.13	3.24E-11	25.18	1.13E-11	25.23	5.09E-11	25.27	5.01E-12	25.19	3.09E-11	25.23	1.43E-11	25.28	7.93E-11	25.32	1.40E-11
25.51	3.81E-11	25.55	2.84E-11	25.60	2.68E-11	25.65	3.12E-12	25.65	2.97E-11	25.69	2.80E-11	25.74	9.61E-12	25.78	2.16E-12	25.56	2.51E-11	25.60	2.74E-11	25.65	1.26E-11	25.69	3.57E-12	25.48	3.48E-11	25.52	1.68E-11	25.57	9.09E-11	25.61	4.57E-12	25.42	3.52E-11	25.46	1.11E-11	25.51	4.78E-11	25.55	1.15E-11	25.46	3.55E-11	25.51	1.48E-11	25.55	7.06E-11	25.60	9.74E-12
25.80	3.71E-11	25.84	2.82E-11	25.89	1.10E-11	25.94	2.66E-14	25.93	3.27E-11	25.97	2.82E-11	26.02	1.13E-11	26.06	2.93E-12	25.83	2.15E-11	25.88	2.99E-11	25.93	1.05E-11	25.97	2.43E-12	25.76	3.07E-11	25.80	7.84E-12	25.85	6.42E-11	25.89	7.36E-12	25.69	3.29E-11	25.74	1.55E-11	25.78	4.89E-11	25.83	7.98E-12	25.74	3.31E-11	25.78	1.89E-11	25.83	5.79E-11	25.88	1.68E-11
26.08	4.39E-11	26.13	2.55E-11	26.17	1.98E-11	26.22	1.82E-13	26.21	2.73E-11	26.26	2.75E-11	26.30	6.83E-12	26.35	6.51E-13	26.11	3.55E-11	26.16	3.06E-11	26.20	9.17E-12	26.25	6.62E-13	26.04	2.59E-11	26.08	5.83E-12	26.13	7.04E-11	26.17	1.78E-11	25.97	3.36E-11	26.02	1.52E-11	26.07	7.58E-11	26.11	6.41E-12	26.02	3.29E-11	26.06	6.45E-12	26.11	7.93E-11	26.16	1.38E-11
26.36	9.99E-12	26.40	2.90E-11	26.45	2.19E-11	26.49	2.68E-12	26.50	2.59E-11	26.54	2.82E-11	26.59	9.40E-12	26.63	2.39E-12	26.39	3.70E-11	26.44	2.84E-11	26.48	1.48E-11	26.52	2.25E-12	26.32	3.25E-11	26.37	1.01E-11	26.41	6.86E-11	26.46	9.10E-12	26.26	3.04E-11	26.30	5.66E-12	26.35	5.63E-11	26.39	1.12E-11	26.29	3.19E-11	26.34	1.31E-11	26.39	7.17E-11	26.43	1.83E-11
26.64	2.75E-11	26.69	2.97E-11	26.73	2.52E-11	26.78	4.93E-12	26.79	2.94E-11	26.84	2.69E-11	26.88	1.79E-11	26.93	5.77E-13	26.69	2.71E-11	26.73	2.72E-11	26.78	1.24E-11	26.82	3.84E-12	26.60	2.92E-11	26.64	1.18E-11	26.69	3.58E-11	26.73	2.00E-11	26.54	3.02E-11	26.58	1.17E-11	26.63	6.30E-11	26.67	7.91E-12	26.57	3.19E-11	26.62	1.30E-11	26.66	8.40E-11	26.71	1.57E-11
26.92	3.40E-11	26.97	3.05E-11	27.01	1.69E-11	27.06	2.78E-13	27.08	3.39E-11	27.13	3.04E-11	27.18	6.26E-12	27.22	3.44E-13	26.97	3.63E-11	27.02	3.07E-11	27.06	1.51E-11	27.11	4.11E-12	26.88	2.79E-11	26.92	2.27E-11	26.97	7.11E-11	27.01	7.05E-12	26.83	3.19E-11	26.88	6.21E-12	26.92	6.06E-11	26.97	1.39E-11	26.85	2.95E-11	26.90	1.30E-11	26.94	6.47E-11	26.99	2.67E-11
27.20	3.32E-11	27.25	2.46E-11	27.29	1.26E-11	27.34	1.47E-13	27.36	3.51E-11	27.41	2.71E-11	27.45	5.92E-12	27.50	6.33E-13	27.27	3.48E-11	27.32	2.93E-11	27.36	1.23E-11	27.41	1.90E-12	27.16	2.96E-11	27.20	1.96E-11	27.25	7.84E-11	27.29	1.55E-11	27.11	2.76E-11	27.15	9.27E-12	27.20	6.70E-11	27.24	6.40E-12	27.12	3.30E-11	27.17	1.21E-11	27.22	8.70E-11	27.26	1.60E-11
27.48	1.02E-11	27.53	2.41E-11	27.57	8.43E-12	27.62	1.53E-12	27.64	2.75E-11	27.69	2.45E-11	27.73	1.35E-11	27.78	5.41E-13	27.57	2.87E-11	27.61	2.78E-11	27.66	1.16E-11	27.71	2.05E-12	27.46	3.18E-11	27.51	8.65E-12	27.56	7.65E-11	27.60	1.49E-11	27.39	3.38E-11	27.44	1.34E-11	27.48	5.38E-11	27.53	2.26E-11	27.40	3.11E-11	27.45	5.12E-12	27.49	7.41E-11	27.54	2.85E-11
27.76	4.15E-11	27.80	2.88E-11	27.85	8.56E-12	27.90	3.34E-12	27.92	2.84E-11	27.97	2.63E-11	28.01	7.37E-12	28.06	3.86E-12	27.85	3.07E-11	27.90	2.89E-11	27.94	1.29E-11	27.99	3.33E-12	27.74	2.83E-11	27.79	1.10E-11	27.84	6.35E-11	27.88	8.86E-12	27.67	3.26E-11	27.71	1.61E-11	27.76	6.64E-11	27.81	1.37E-11	27.70	2.88E-11	27.74	1.10E-11	27.79	8.87E-11	27.83	2.02E-11
28.05	3.05E-11	28.09	2.90E-11	28.14	1.08E-11	28.18	1.75E-12	28.20	2.18E-11	28.24	2.73E-11	28.29	1.32E-11	28.34	4.48E-13	28.13	3.47E-11	28.18	2.76E-11	28.22	1.50E-11	28.27	2.33E-12	28.03	2.76E-11	28.07	1.70E-11	28.12	6.44E-11	28.16	7.49E-12	27.96	3.27E-11	28.01	6.08E-12	28.05	5.49E-11	28.10	7.29E-13	27.98	3.43E-11	28.02	1.47E-11	28.07	9.11E-11	28.12	2.49E-11
28.32	3.99E-11	28.36	2.38E-11	28.41	1.74E-11	28.46	3.07E-12	28.47	3.22E-11	28.52	2.39E-11	28.57	1.21E-11	28.61	4.89E-13	28.44	2.79E-11	28.49	2.84E-11	28.53	1.84E-11	28.58	6.82E-13	28.32	2.69E-11	28.37	7.23E-12	28.41	8.61E-11	28.46	2.80E-11	28.24	3.62E-11	28.29	1.21E-11	28.33	5.97E-11	28.38	2.01E-11	28.26	3.29E-11	28.30	7.27E-12	28.35	7.06E-11	28.39	2.73E-11
28.60	2.92E-11	28.65	3.01E-11	28.70	1.45E-11	28.74	5.99E-12	28.75	2.29E-11	28.80	3.24E-11	28.84	5.25E-12	28.89	4.74E-13	28.74	2.44E-11	28.78	2.72E-11	28.83	1.22E-11	28.88	3.45E-12	28.60	3.04E-11	28.65	8.11E-12	28.69	6.03E-11	28.74	1.44E-11	28.52	2.62E-11	28.56	1.59E-11	28.61	6.55E-11	28.65	6.77E-12	28.54	2.83E-11	28.58	1.61E-11	28.63	5.67E-11	28.67	1.89E-11
28.88	2.95E-11	28.93	2.78E-11	28.98	1.82E-11	29.02	5.69E-13	29.03	2.56E-11	29.08	2.74E-11	29.12	6.30E-12	29.17	4.73E-13	29.01	3.33E-11	29.06	2.87E-11	29.10	9.22E-12	29.15	3.73E-12	28.88	3.48E-11	28.92	1.16E-11	28.97	8.42E-11	29.02	3.27E-11	28.80	2.81E-11	28.84	1.18E-11	28.89	5.82E-11	28.93	1.56E-11	28.82	3.00E-11	28.86	6.06E-12	28.91	8.81E-11	28.95	2.50E-11
29.17	3.77E-11	29.21	2.85E-11	29.26	8.71E-12	29.30	4.27E-13	29.31	2.68E-11	29.35	2.56E-11	29.40	6.53E-12	29.45	3.58E-12	29.30	2.56E-11	29.35	3.01E-11	29.40	1.30E-11	29.44	3.99E-12	29.16	2.28E-11	29.21	1.74E-11	29.25	6.19E-11	29.30	1.71E-11	29.07	3.23E-11	29.12	1.50E-11	29.16	4.86E-11	29.21	7.12E-12	29.09	3.35E-11	29.14	7.27E-12	29.19	7.93E-11	29.23	3.71E-11
29.48	3.48E-11	29.53	2.98E-11	29.57	1.55E-11	29.62	2.18E-13	29.59	2.61E-11	29.64	3.07E-11	29.68	6.23E-12	29.73	5.84E-13	29.59	3.28E-11	29.64	2.86E-11	29.68	1.22E-11	29.73	4.14E-12	29.46	3.09E-11	29.50	1.61E-11	29.55	6.38E-11	29.60	1.80E-11	29.36	3.28E-11	29.40	6.76E-12	29.45	6.37E-11	29.49	2.05E-11	29.37	3.34E-11	29.42	1.44E-11	29.46	9.05E-11	29.51	2.35E-11
29.76	2.64E-11	29.80	2.45E-11	29.85	3.52E-13	29.90	4.86E-12	29.87	2.25E-11	29.92	2.64E-11	29.96	6.17E-12	30.01	3.34E-12	29.88	2.16E-11	29.93	2.83E-11	29.97	1.66E-11	30.02	3.23E-12	29.74	3.09E-11	29.79	6.56E-13	29.83	6.26E-11	29.88	1.16E-11	29.63	3.29E-11	29.68	1.34E-11	29.72	7.48E-11	29.77	1.59E-11	29.67	3.06E-11	29.71	6.07E-12	29.76	8.05E-11	29.81	2.36E-11
30.04	1.08E-11	30.09	2.31E-11	30.13	1.89E-11	30.18	1.44E-12	30.15	2.07E-11	30.19	3.01E-11	30.24	1.34E-11	30.28	5.30E-13	30.16	1.93E-11	30.21	2.95E-11	30.25	5.62E-12	30.30	7.07E-12	30.03	2.77E-11	30.07	7.87E-12	30.12	7.44E-11	30.17	1.41E-11	29.92	3.47E-11	29.96	1.90E-11	30.01	6.68E-11	30.05	2.00E-11	29.95	3.35E-11	29.99	1.63E-11	30.04	9.63E-11	30.09	1.99E-11
30.33	2.29E-11	30.37	2.66E-11	30.42	5.35E-12	30.46	-1.74E-13	30.43	2.01E-11	30.47	2.73E-11	30.52	4.65E-12	30.56	3.68E-12	30.44	2.33E-11	30.49	2.88E-11	30.53	8.16E-12	30.58	3.37E-12	30.30	3.03E-11	30.35	8.16E-12	30.39	5.35E-11	30.44	9.99E-12	30.20	2.80E-11	30.24	4.83E-12	30.29	6.67E-11	30.33	2.78E-11	30.24	3.26E-11	30.28	1.33E-11	30.33	1.01E-10	30.37	3.27E-11
30.63	2.86E-11	30.68	2.65E-11	30.72	8.76E-12	30.77	5.42E-12	30.71	3.42E-11	30.75	2.70E-11	30.80	1.18E-11	30.85	1.81E-12	30.72	2.42E-11	30.77	2.74E-11	30.81	7.68E-12	30.86	8.56E-12	30.59	2.94E-11	30.63	2.01E-11	30.68	7.67E-11	30.72	2.77E-11	30.47	3.24E-11	30.52	1.44E-11	30.57	6.29E-11	30.61	2.93E-11	30.52	3.24E-11	30.56	8.50E-12	30.61	9.57E-11	30.65	3.34E-11
30.91	1.54E-11	30.96	2.74E-11	31.00	3.60E-13	31.05	6.86E-14	31.00	2.27E-11	31.04	3.03E-11	31.09	5.76E-12	31.14	5.40E-13	31.00	1.57E-11	31.05	2.80E-11	31.09	4.26E-12	31.14	2.43E-12	30.89	3.02E-11	30.94	9.12E-12	30.98	7.86E-11	31.03	1.96E-11	30.75	3.31E-11	30.80	1.55E-11	30.85	7.27E-11	30.89	1.79E-11	30.81	2.74E-11	30.86	8.21E-12	30.91	8.81E-11	30.95	3.04E-11
31.21	3.72E-11	31.25	3.04E-11	31.30	6.93E-12	31.34	4.35E-12	31.29	1.79E-11	31.34	2.54E-11	31.38	6.68E-12	31.43	3.36E-12	31.29	2.10E-11	31.33	3.06E-11	31.38	5.45E-12	31.42	6.29E-13	31.18	2.69E-11	31.23	5.95E-12	31.27	6.01E-11	31.32	1.31E-11	31.03	3.14E-11	31.08	5.58E-12	31.12	6.59E-11	31.17	3.12E-11	31.11	3.46E-11	31.16	1.20E-11	31.20	8.52E-11	31.25	3.02E-11
31.49	2.48E-11	31.53	2.66E-11	31.58	9.31E-12	31.63	6.52E-12	31.57	2.51E-11	31.61	2.88E-11	31.66	7.87E-12	31.70	5.13E-12	31.56	1.57E-11	31.61	2.99E-11	31.65	6.72E-12	31.70	1.03E-11	31.45	2.94E-11	31.50	5.82E-12	31.54	7.89E-11	31.59	2.68E-11	31.31	3.57E-11	31.36	6.75E-12	31.40	7.23E-11	31.45	7.14E-12	31.39	3.37E-11	31.44	1.18E-11	31.48	1.02E-10	31.53	3.03E-11
31.76	1.81E-11	31.81	2.55E-11	31.85	6.74E-12	31.91	2.45E-12	31.85	2.63E-11	31.89	2.58E-11	31.94	1.11E-12	31.98	6.72E-12	31.84	2.36E-11	31.89	2.59E-11	31.93	3.79E-12	31.98	4.49E-12	31.73	3.26E-11	31.77	7.74E-12	31.82	6.99E-11	31.87	2.06E-11	31.59	3.44E-11	31.64	6.85E-12	31.68	8.73E-11	31.73	1.99E-11	31.66	3.36E-11	31.71	1.42E-11	31.76	6.45E-11	31.80	2.74E-11
32.06	2.87E-11	32.11	2.48E-11	32.15	1.92E-11	32.20	1.68E-13	32.14	1.67E-11	32.19	3.02E-11	32.23	1.45E-11	32.28	3.74E-12	32.12	2.21E-11	32.16	2.91E-11	32.21	4.55E-12	32.25	8.29E-12	32.01	2.94E-11	32.06	6.05E-12	32.10	6.69E-11	32.15	3.06E-11	31.87	3.26E-11	31.92	3.37E-12	31.96	5.87E-11	32.01	7.34E-12	31.95	2.99E-11	31.99	1.36E-11	32.04	9.63E-11	32.08	3.18E-11
32.35	9.41E-12	32.40	2.53E-11	32.44	1.59E-11	32.49	4.20E-12	32.42	2.38E-11	32.47	3.03E-11	32.51	1.00E-11	32.56	2.83E-12	32.39	2.09E-11	32.44	2.55E-11	32.48	1.25E-11	32.53	5.07E-12	32.31	2.60E-11	32.36	4.90E-12	32.40	6.65E-11	32.45	3.45E-11	32.15	2.79E-11	32.20	6.29E-12	32.24	9.81E-11	32.29	1.82E-11	32.22	3.12E-11	32.27	4.65E-12	32.31	8.58E-11	32.36	3.52E-11
32.65	2.83E-11	32.69	2.18E-11	32.74	1.08E-11	32.79	4.59E-13	32.70	1.87E-11	32.75	2.56E-11	32.79	6.88E-12	32.84	9.96E-13	32.68	1.46E-11	32.73	3.14E-11	32.77	1.68E-11	32.82	1.50E-11	32.59	2.93E-11	32.64	7.01E-12	32.68	7.61E-11	32.73	8.23E-12	32.43	2.84E-11	32.48	6.83E-12	32.52	6.14E-11	32.57	2.19E-11	32.50	2.98E-11	32.55	8.86E-12	32.60	9.11E-11	32.64	2.68E-11
32.93	2.68E-11	32.97	2.91E-11	33.02	3.78E-13	33.07	2.17E-13	32.98	2.51E-11	33.03	2.64E-11	33.07	2.13E-11	33.12	5.00E-12	32.96	2.32E-11	33.01	2.66E-11	33.05	1.10E-12	33.10	1.17E-11	32.87	2.41E-11	32.92	1.39E-11	32.96	8.15E-11	33.01	2.36E-11	32.72	3.16E-11	32.76	8.77E-12	32.81	7.06E-11	32.85	2.16E-11	32.78	2.94E-11	32.83	5.31E-12	32.88	9.63E-11	32.93	3.36E-11
33.21	2.05E-11	33.25	2.84E-11	33.30	8.98E-12	33.34	3.59E-12	33.27	2.13E-11	33.31	2.76E-11	33.36	1.02E-11	33.41	5.23E-12	33.24	2.31E-11	33.29	2.78E-11	33.33	5.90E-12	33.38	2.12E-12	33.15	2.68E-11	33.20	8.46E-12	33.24	7.90E-11	33.29	3.60E-11	33.00	3.28E-11	33.05	5.18E-12	33.09	6.43E-11	33.14	2.12E-11	33.06	3.10E-11	33.11	1.07E-11	33.16	8.34E-11	33.20	4.34E-11
33.49	3.68E-11	33.53	2.33E-11	33.58	5.88E-12	33.62	2.86E-12	33.60	2.32E-11	33.65	2.71E-11	33.69	5.84E-12	33.74	6.61E-12	33.52	1.53E-11	33.56	2.84E-11	33.61	4.63E-12	33.66	1.21E-11	33.43	2.48E-11	33.48	2.25E-11	33.53	6.54E-11	33.57	2.84E-11	33.28	3.32E-11	33.33	1.20E-11	33.37	7.73E-11	33.42	2.30E-11	33.34	3.06E-11	33.39	4.91E-12	33.43	7.88E-11	33.48	3.31E-11
33.78	2.67E-11	33.83	1.92E-11	33.87	1.66E-11	33.92	5.20E-12	33.89	1.83E-11	33.93	2.80E-11	33.98	1.05E-11	34.02	2.13E-12	33.80	1.42E-11	33.84	2.90E-11	33.89	4.21E-12	33.93	4.18E-12	33.71	3.28E-11	33.76	1.44E-11	33.80	7.63E-11	33.85	2.67E-11	33.56	3.14E-11	33.61	4.60E-12	33.66	5.32E-11	33.70	2.43E-11	33.62	3.35E-11	33.67	7.98E-12	33.72	8.46E-11	33.76	3.42E-11
34.06	3.65E-11	34.10	3.21E-11	34.15	3.49E-13	34.20	3.75E-12	34.17	2.13E-11	34.21	2.59E-11	34.26	4.35E-12	34.31	5.08E-12	34.08	1.67E-11	34.13	2.95E-11	34.17	5.02E-12	34.22	5.32E-12	33.99	2.79E-11	34.03	5.55E-12	34.08	6.98E-11	34.13	2.40E-11	33.86	3.04E-11	33.90	9.70E-12	33.95	7.87E-11	33.99	7.27E-12	33.91	3.05E-11	33.96	7.10E-12	34.00	9.87E-11	34.05	3.12E-11
34.34	9.39E-12	34.39	2.61E-11	34.43	7.39E-12	34.48	2.91E-12	34.45	1.07E-11	34.49	2.66E-11	34.54	5.32E-12	34.59	9.84E-12	34.36	1.77E-11	34.41	2.76E-11	34.45	3.89E-12	34.50	9.31E-12	34.27	2.87E-11	34.32	5.99E-12	34.36	8.74E-11	34.41	2.73E-11	34.14	3.12E-11	34.18	6.19E-12	34.23	6.73E-11	34.28	3.43E-11	34.19	3.29E-11	34.23	1.04E-11	34.28	1.06E-10	34.32	3.70E-11
34.62	8.46E-12	34.67	2.46E-11	34.71	1.26E-11	34.76	3.22E-12	34.73	1.81E-11	34.77	2.31E-11	34.82	5.46E-12	34.86	3.37E-12	34.64	1.57E-11	34.68	2.67E-11	34.73	5.80E-12	34.77	3.31E-12	34.55	3.25E-11	34.59	6.74E-13	34.64	7.86E-11	34.68	3.43E-11	34.42	3.16E-11	34.46	4.49E-12	34.51	6.31E-11	34.56	2.76E-11	34.47	3.23E-11	34.51	1.17E-11	34.56	9.75E-11	34.60	4.03E-11
34.90	2.14E-11	34.95	2.43E-11	34.99	7.74E-12	35.04	3.12E-13	35.00	2.48E-11	35.05	2.87E-11	35.09	5.71E-12	35.14	5.30E-12	34.92	1.95E-11	34.96	2.65E-11	35.01	5.16E-12	35.05	8.72E-12	34.82	2.69E-11	34.87	4.28E-12	34.91	8.52E-11	34.96	2.67E-11	34.70	3.04E-11	34.74	3.22E-12	34.79	6.83E-11	34.83	2.76E-11	34.74	3.30E-11	34.79	8.39E-12	34.83	8.40E-11	34.88	3.56E-11
35.18	7.83E-12	35.23	2.52E-11	35.27	1.08E-11	35.32	5.06E-13	35.29	1.65E-11	35.34	2.33E-11	35.38	1.11E-11	35.43	5.64E-12	35.20	2.30E-11	35.24	2.59E-11	35.29	1.12E-11	35.33	5.73E-12	35.10	3.31E-11	35.15	7.10E-12	35.19	8.03E-11	35.24	2.50E-11	34.98	2.79E-11	35.02	7.23E-12	35.07	9.38E-11	35.12	2.90E-11	35.02	3.15E-11	35.06	9.32E-12	35.11	8.99E-11	35.16	3.46E-11
35.47	2.11E-11	35.51	2.51E-11	35.56	8.81E-12	35.60	5.68E-12	35.57	7.06E-12	35.61	2.23E-11	35.66	1.01E-11	35.71	6.89E-12	35.49	1.39E-11	35.54	2.80E-11	35.58	5.25E-12	35.63	6.37E-12	35.39	2.96E-11	35.43	1.72E-11	35.48	7.66E-11	35.53	3.73E-11	35.26	3.09E-11	35.31	1.19E-11	35.35	7.04E-11	35.40	2.50E-11	35.30	3.22E-11	35.34	5.53E-12	35.39	8.05E-11	35.44	4.17E-11
35.75	1.87E-11	35.80	2.54E-11	35.84	7.04E-12	35.89	6.67E-12	35.85	1.28E-11	35.90	2.46E-11	35.94	1.26E-11	35.99	4.93E-12	35.77	1.97E-11	35.81	2.89E-11	35.86	5.35E-12	35.91	1.01E-11	35.68	2.82E-11	35.72	6.23E-12	35.77	8.71E-11	35.81	2.72E-11	35.54	2.93E-11	35.58	8.55E-12	35.63	7.61E-11	35.67	2.80E-11	35.58	2.78E-11	35.63	1.56E-11	35.67	8.87E-11	35.72	3.84E-11
36.03	9.68E-12	36.07	2.18E-11	36.12	1.27E-11	36.16	4.43E-12	36.13	1.58E-11	36.17	2.52E-11	36.22	6.26E-12	36.26	6.47E-12	36.05	1.44E-11	36.10	2.67E-11	36.14	9.76E-12	36.19	1.14E-11	35.97	2.61E-11	36.02	5.65E-12	36.06	9.18E-11	36.11	9.10E-12	35.82	3.22E-11	35.86	5.00E-12	35.91	9.09E-11	35.95	2.81E-11	35.86	2.97E-11	35.90	9.62E-12	35.95	9.22E-11	36.00	5.26E-11
36.32	1.04E-11	36.37	2.46E-11	36.41	1.73E-11	36.46	5.63E-12	36.40	7.26E-12	36.45	2.93E-11	36.49	4.54E-12	36.54	1.25E-11	36.33	1.08E-11	36.38	2.61E-11	36.43	1.33E-11	36.47	1.12E-11	36.25	2.88E-11	36.29	4.88E-12	36.34	6.17E-11	36.39	3.29E-11	36.10	2.80E-11	36.14	8.10E-13	36.19	6.22E-11	36.24	2.13E-11	36.14	2.92E-11	36.19	1.71E-11	36.23	9.34E-11	36.28	3.58E-11
36.60	2.54E-11	36.65	2.34E-11	36.69	1.29E-11	36.74	6.05E-12	36.69	2.37E-11	36.73	2.66E-11	36.78	6.88E-12	36.82	5.88E-12	36.61	1.72E-11	36.66	2.67E-11	36.71	7.46E-12	36.75	6.69E-12	36.52	2.83E-11	36.57	2.28E-11	36.62	7.37E-11	36.66	3.08E-11	36.38	2.79E-11	36.42	3.96E-12	36.47	6.95E-11	36.51	2.46E-11	36.42	3.04E-11	36.46	5.23E-12	36.51	7.35E-11	36.55	3.48E-11
36.88	1.05E-11	36.93	2.41E-11	36.98	7.27E-12	37.02	6.97E-12	36.96	1.40E-11	37.01	2.66E-11	37.05	6.38E-12	37.10	3.99E-12	36.90	1.54E-11	36.94	2.95E-11	36.99	5.16E-12	37.03	1.43E-11	36.80	2.53E-11	36.85	8.46E-12	36.90	8.31E-11	36.94	3.55E-11	36.65	3.14E-11	36.70	4.72E-12	36.74	6.90E-11	36.79	2.47E-11	36.70	3.20E-11	36.74	1.54E-11	36.79	1.00E-10	36.83	3.76E-11
37.18	9.25E-12	37.22	2.48E-11	37.27	1.76E-13	37.32	1.06E-11	37.24	2.56E-11	37.28	2.71E-11	37.33	3.45E-12	37.37	3.63E-12	37.18	2.19E-11	37.22	2.47E-11	37.27	4.64E-12	37.31	1.41E-11	37.08	2.69E-11	37.13	7.00E-12	37.17	7.74E-11	37.22	2.07E-11	36.93	3.16E-11	36.98	2.95E-12	37.03	7.87E-11	37.07	2.37E-11	36.98	3.06E-11	37.02	1.61E-11	37.07	1.08E-10	37.12	3.92E-11
37.46	1.06E-11	37.50	2.23E-11	37.55	9.14E-12	37.59	6.39E-12	37.52	6.59E-12	37.56	2.76E-11	37.61	6.55E-12	37.65	4.13E-12	37.46	1.72E-11	37.50	2.84E-11	37.55	4.61E-12	37.60	9.63E-12	37.36	2.60E-11	37.40	4.30E-12	37.45	1.08E-10	37.50	2.72E-11	37.21	3.04E-11	37.26	9.84E-12	37.30	8.16E-11	37.35	2.23E-11	37.26	3.12E-11	37.30	5.60E-12	37.35	9.99E-11	37.39	4.45E-11
37.74	9.32E-12	37.79	2.33E-11	37.83	1.17E-11	37.88	8.44E-12	37.79	2.02E-11	37.84	2.93E-11	37.88	8.91E-12	37.93	5.23E-12	37.75	8.86E-12	37.79	2.87E-11	37.84	6.02E-12	37.88	7.17E-12	37.64	2.87E-11	37.68	4.28E-12	37.73	8.69E-11	37.77	2.32E-11	37.49	3.04E-11	37.54	4.17E-12	37.58	8.45E-11	37.63	2.61E-11	37.54	3.24E-11	37.58	8.33E-12	37.63	9.16E-11	37.68	3.43E-11
38.03	1.02E-11	38.08	2.45E-11	38.12	5.50E-12	38.17	7.26E-12	38.08	2.25E-11	38.12	2.43E-11	38.17	2.83E-12	38.22	5.98E-12	38.03	5.57E-12	38.07	2.72E-11	38.12	4.59E-12	38.16	9.31E-12	37.91	2.95E-11	37.96	7.72E-12	38.01	7.30E-11	38.05	3.45E-11	37.77	3.42E-11	37.81	7.22E-12	37.86	6.76E-11	37.90	2.20E-11	37.82	3.01E-11	37.86	1.03E-11	37.91	9.75E-11	37.96	3.45E-11
38.31	1.06E-11	38.36	2.19E-11	38.41	5.17E-12	38.45	6.80E-12	38.36	1.33E-11	38.40	2.35E-11	38.45	1.26E-11	38.49	1.21E-11	38.30	1.25E-11	38.35	2.76E-11	38.39	8.37E-12	38.44	6.90E-13	38.20	2.57E-11	38.24	2.80E-12	38.29	8.19E-11	38.34	2.15E-11	38.06	3.09E-11	38.11	9.70E-12	38.15	7.10E-11	38.20	2.66E-11	38.10	3.03E-11	38.14	6.20E-12	38.19	9.81E-11	38.24	4.22E-11
38.60	1.04E-11	38.65	2.54E-11	38.69	7.79E-12	38.74	6.96E-12	38.64	7.64E-12	38.68	2.34E-11	38.73	6.92E-12	38.78	1.70E-11	38.58	2.12E-11	38.63	2.96E-11	38.67	9.33E-12	38.72	5.10E-12	38.48	2.94E-11	38.53	5.12E-12	38.57	8.61E-11	38.62	2.65E-11	38.34	2.75E-11	38.38	7.91E-13	38.43	7.73E-11	38.47	2.85E-11	38.39	2.91E-11	38.44	5.16E-12	38.49	8.64E-11	38.53	3.14E-11
38.88	7.53E-12	38.93	2.69E-11	38.97	3.49E-12	39.02	8.21E-12	38.92	6.98E-12	38.96	2.83E-11	39.01	7.66E-12	39.06	1.33E-11	38.86	1.70E-11	38.91	2.90E-11	38.95	1.12E-12	39.00	1.00E-11	38.76	2.98E-11	38.81	2.71E-11	38.85	7.34E-11	38.90	3.06E-11	38.61	3.14E-11	38.66	5.55E-12	38.71	6.50E-11	38.75	2.09E-11	38.68	2.70E-11	38.73	1.10E-11	38.77	1.09E-10	38.82	3.30E-11
39.16	1.02E-11	39.21	2.62E-11	39.25	1.88E-11	39.30	4.39E-12	39.20	1.22E-11	39.25	2.94E-11	39.29	1.01E-12	39.34	6.35E-13	39.14	2.48E-11	39.19	2.82E-11	39.23	8.05E-12	39.28	4.39E-12	39.04	2.85E-11	39.09	8.48E-12	39.13	8.02E-11	39.18	3.34E-11	38.89	2.85E-11	38.94	6.13E-12	38.98	5.67E-11	39.03	2.14E-11	38.96	3.17E-11	39.01	1.86E-11	39.05	1.02E-10	39.10	3.33E-11
39.44	1.58E-11	39.49	2.23E-11	39.53	6.82E-12	39.58	6.96E-12	39.49	1.39E-11	39.54	2.54E-11	39.59	7.80E-12	39.63	5.27E-12	39.42	4.21E-12	39.47	3.19E-11	39.51	5.97E-12	39.56	4.12E-12	39.32	2.73E-11	39.36	1.40E-11	39.41	7.22E-11	39.45	8.84E-12	39.17	3.00E-11	39.22	3.98E-12	39.26	6.68E-11	39.31	4.28E-11	39.24	3.36E-11	39.29	6.39E-12	39.33	8.17E-11	39.38	3.19E-11
39.72	1.20E-11	39.77	2.31E-11	39.81	4.77E-12	39.86	1.31E-11	39.78	1.31E-11	39.82	2.23E-11	39.87	4.59E-12	39.92	5.43E-12	39.70	1.29E-11	39.74	2.79E-11	39.79	3.75E-12	39.83	1.22E-11	39.60	3.02E-11	39.64	9.08E-12	39.69	8.95E-11	39.73	9.97E-12	39.45	2.90E-11	39.50	3.93E-12	39.54	8.95E-11	39.59	2.48E-11	39.52	3.24E-11	39.57	1.30E-11	39.61	8.87E-11	39.66	2.70E-11
40.00	9.49E-12	40.04	2.54E-11	40.09	6.18E-12	40.14	5.62E-13	40.06	7.43E-12	40.11	2.46E-11	40.15	8.70E-12	40.20	5.33E-12	39.98	1.32E-11	40.02	2.79E-11	40.07	4.74E-12	40.12	1.40E-11	39.88	2.80E-11	39.92	1.67E-11	39.97	8.48E-11	40.01	2.02E-11	39.74	3.20E-11	39.79	4.35E-12	39.83	7.50E-11	39.88	2.75E-11	39.80	3.22E-11	39.84	1.82E-11	39.89	1.08E-10	39.93	2.69E-11
40.28	9.90E-12	40.32	2.30E-11	40.37	8.75E-12	40.41	1.78E-11	40.34	7.36E-12	40.39	2.66E-11	40.43	5.66E-12	40.48	9.14E-12	40.26	9.29E-12	40.30	2.70E-11	40.35	4.44E-12	40.40	1.35E-11	40.16	2.65E-11	40.20	6.73E-12	40.26	9.20E-11	40.30	2.61E-11	40.02	3.31E-11	40.07	1.79E-11	40.11	9.95E-11	40.16	2.34E-11	40.08	3.07E-11	40.13	7.22E-12	40.17	1.04E-10	40.22	4.04E-11
40.56	1.54E-11	40.60	2.56E-11	40.65	1.15E-11	40.69	3.40E-11	40.62	9.24E-12	40.67	2.84E-11	40.71	3.95E-12	40.76	1.40E-11	40.54	1.53E-11	40.58	2.50E-11	40.63	1.02E-11	40.67	1.07E-11	40.46	2.65E-11	40.51	5.61E-12	40.56	8.94E-11	40.60	4.48E-11	40.31	3.13E-11	40.35	4.48E-12	40.40	9.88E-11	40.45	3.21E-11	40.35	3.35E-11	40.40	7.51E-12	40.45	9.63E-11	40.49	3.35E-11
40.84	4.08E-11	40.88	2.59E-11	40.93	8.75E-12	40.97	4.21E-11	40.90	1.26E-11	40.95	2.76E-11	40.99	5.67E-12	41.04	5.52E-12	40.81	1.48E-11	40.86	2.57E-11	40.91	8.85E-12	40.96	7.12E-12	40.74	2.56E-11	40.79	6.53E-12	40.83	1.08E-10	40.88	6.59E-11	40.59	3.49E-11	40.64	2.98E-12	40.68	9.52E-11	40.73	5.21E-11	40.64	2.96E-11	40.68	9.68E-12	40.73	1.05E-10	40.77	3.43E-11
41.12	4.62E-11	41.17	2.37E-11	41.21	5.47E-12	41.26	5.19E-11	41.18	1.56E-11	41.23	2.46E-11	41.27	7.03E-12	41.32	1.38E-11	41.10	9.66E-12	41.14	2.79E-11	41.19	4.56E-12	41.23	4.26E-12	41.02	2.97E-11	41.07	5.97E-12	41.12	1.33E-10	41.16	9.12E-11	40.87	3.01E-11	40.92	3.76E-12	40.96	1.17E-10	41.01	7.46E-11	40.92	3.11E-11	40.96	4.27E-12	41.01	9.75E-11	41.05	3.76E-11
41.40	5.83E-11	41.44	2.60E-11	41.49	8.80E-12	41.53	7.06E-11	41.46	2.84E-11	41.51	2.86E-11	41.55	1.74E-11	41.60	2.68E-11	41.37	1.71E-11	41.42	2.72E-11	41.46	4.63E-12	41.51	2.68E-11	41.31	2.67E-11	41.35	7.07E-12	41.40	1.62E-10	41.45	1.20E-10	41.15	3.07E-11	41.19	4.51E-12	41.24	1.53E-10	41.28	1.25E-10	41.20	2.78E-11	41.24	4.89E-12	41.29	1.35E-10	41.33	8.08E-11
41.67	9.37E-11	41.72	2.32E-11	41.77	6.73E-12	41.81	7.79E-11	41.74	5.00E-11	41.78	2.61E-11	41.83	3.83E-12	41.88	5.09E-11	41.65	2.27E-11	41.70	2.64E-11	41.74	8.37E-12	41.79	3.05E-11	41.58	2.84E-11	41.63	3.51E-12	41.68	1.93E-10	41.73	1.44E-10	41.42	3.21E-11	41.47	1.54E-11	41.52	1.81E-10	41.56	1.44E-10	41.48	2.78E-11	41.53	5.02E-12	41.57	1.53E-10	41.62	1.22E-10
41.96	9.01E-11	42.01	2.44E-11	42.05	6.77E-12	42.10	1.45E-10	42.02	5.60E-11	42.06	2.84E-11	42.11	6.01E-12	42.16	3.52E-11	41.93	3.94E-11	41.98	2.68E-11	42.02	5.04E-12	42.07	5.02E-11	41.87	2.47E-11	41.92	1.21E-11	41.96	1.97E-10	42.01	2.01E-10	41.72	2.91E-11	41.76	8.19E-12	41.81	2.23E-10	41.85	2.17E-10	41.76	3.12E-11	41.80	1.48E-11	41.85	2.03E-10	41.90	1.59E-10
42.23	1.24E-10	42.28	2.57E-11	42.33	4.76E-12	42.37	1.21E-10	42.30	6.64E-11	42.34	2.73E-11	42.39	1.48E-11	42.44	6.82E-11	42.23	5.27E-11	42.28	2.65E-11	42.32	5.29E-12	42.37	5.84E-11	42.15	2.92E-11	42.20	7.61E-12	42.24	2.43E-10	42.29	2.39E-10	42.00	3.25E-11	42.05	8.07E-13	42.09	2.71E-10	42.14	2.49E-10	42.04	3.22E-11	42.08	6.69E-12	42.13	2.32E-10	42.18	1.99E-10
42.51	1.27E-10	42.56	2.68E-11	42.60	3.83E-13	42.65	1.45E-10	42.58	7.28E-11	42.62	2.84E-11	42.67	6.13E-12	42.71	1.04E-10	42.51	7.82E-11	42.56	2.62E-11	42.61	1.40E-11	42.65	9.41E-11	42.43	2.58E-11	42.48	2.50E-11	42.52	2.95E-10	42.57	2.70E-10	42.28	3.24E-11	42.32	3.18E-12	42.37	3.12E-10	42.42	2.26E-10	42.34	3.03E-11	42.38	1.16E-11	42.43	2.79E-10	42.48	2.45E-10
42.79	1.17E-10	42.83	2.08E-11	42.88	1.15E-11	42.93	1.65E-10	42.85	9.44E-11	42.90	2.87E-11	42.95	1.32E-11	42.99	1.01E-10	42.79	6.97E-11	42.84	2.71E-11	42.88	4.32E-12	42.93	8.08E-11	42.71	2.58E-11	42.76	6.99E-12	42.80	3.51E-10	42.85	3.13E-10	42.56	3.19E-11	42.60	1.16E-11	42.65	3.88E-10	42.69	3.38E-10	42.62	3.31E-11	42.66	5.99E-12	42.71	3.44E-10	42.76	2.84E-10
43.07	1.52E-10	43.12	2.93E-11	43.16	7.93E-12	43.21	2.07E-10	43.13	1.01E-10	43.18	2.56E-11	43.22	1.48E-11	43.27	1.25E-10	43.07	9.16E-11	43.12	2.73E-11	43.16	1.13E-11	43.21	1.15E-10	42.99	3.02E-11	43.04	1.26E-11	43.08	3.78E-10	43.13	3.91E-10	42.83	2.81E-11	42.88	5.59E-12	42.93	4.11E-10	42.97	3.33E-10	42.90	3.14E-11	42.95	9.38E-12	42.99	4.29E-10	43.04	3.32E-10
43.35	2.09E-10	43.39	2.53E-11	43.44	7.54E-12	43.48	2.13E-10	43.42	1.28E-10	43.46	2.75E-11	43.51	1.54E-11	43.55	1.28E-10	43.35	1.12E-10	43.40	2.79E-11	43.44	5.28E-12	43.49	1.30E-10	43.27	2.88E-11	43.32	8.56E-12	43.36	4.81E-10	43.41	4.16E-10	43.12	3.09E-11	43.17	6.66E-12	43.21	4.63E-10	43.26	3.32E-10	43.18	3.42E-11	43.22	6.15E-12	43.27	4.61E-10	43.32	3.71E-10
43.63	2.17E-10	43.67	2.58E-11	43.72	7.79E-12	43.76	2.33E-10	43.71	1.38E-10	43.75	2.64E-11	43.80	5.04E-12	43.85	1.75E-10	43.64	1.26E-10	43.69	2.73E-11	43.73	4.74E-12	43.78	1.56E-10	43.55	3.10E-11	43.59	4.46E-12	43.64	4.86E-10	43.68	4.01E-10	43.40	3.30E-11	43.44	5.89E-12	43.49	5.18E-10	43.53	3.72E-10	43.46	2.96E-11	43.51	6.28E-12	43.55	4.93E-10	43.60	4.23E-10
43.90	1.90E-10	43.95	2.57E-11	43.99	1.02E-11	44.04	2.15E-10	43.99	1.64E-10	44.03	2.72E-11	44.08	9.96E-12	44.13	2.05E-10	43.92	1.63E-10	43.97	2.73E-11	44.01	5.48E-12	44.06	1.70E-10	43.82	2.49E-11	43.87	1.40E-11	43.92	5.85E-10	43.96	3.90E-10	43.69	3.41E-11	43.73	5.06E-12	43.78	5.27E-10	43.82	3.00E-10	43.74	3.03E-11	43.78	1.20E-11	43.83	5.70E-10	43.89	3.95E-10
44.19	2.22E-10	44.23	1.80E-11	44.28	7.43E-12	44.32	2.99E-10	44.28	1.60E-10	44.33	2.68E-11	44.37	7.38E-12	44.42	2.22E-10	44.22	1.98E-10	44.26	2.83E-11	44.31	5.71E-12	44.35	1.95E-10	44.11	3.08E-11	44.15	7.41E-12	44.20	5.69E-10	44.25	4.17E-10	43.96	3.13E-11	44.01	1.47E-11	44.05	5.30E-10	44.10	2.39E-10	44.05	3.20E-11	44.10	5.34E-12	44.15	6.15E-10	44.20	3.43E-10
44.46	2.12E-10	44.51	2.26E-11	44.55	7.16E-12	44.60	2.79E-10	44.56	1.79E-10	44.60	2.72E-11	44.65	1.68E-11	44.70	2.00E-10	44.49	1.71E-10	44.54	2.71E-11	44.58	5.77E-12	44.63	2.21E-10	44.39	3.08E-11	44.44	9.43E-12	44.48	5.40E-10	44.53	3.71E-10	44.24	3.27E-11	44.28	4.81E-12	44.33	5.05E-10	44.38	2.17E-10	44.34	3.41E-11	44.39	1.25E-11	44.43	6.39E-10	44.51	3.35E-10
44.74	2.31E-10	44.79	2.39E-11	44.83	1.60E-11	44.88	2.52E-10	44.84	2.15E-10	44.88	3.00E-11	44.93	1.75E-11	44.97	2.30E-10	44.79	2.25E-10	44.84	3.10E-11	44.88	3.69E-12	44.93	2.40E-10	44.67	3.72E-11	44.71	6.50E-12	44.76	5.47E-10	44.80	2.76E-10	44.52	2.98E-11	44.56	7.00E-12	44.61	4.92E-10	44.65	1.38E-10	44.65	3.45E-11	44.69	9.62E-12	44.74	5.43E-10	44.81	2.35E-10
45.02	2.15E-10	45.07	2.52E-11	45.11	1.31E-11	45.16	2.67E-10	45.12	1.88E-10	45.16	2.61E-11	45.21	1.13E-11	45.26	2.18E-10	45.07	1.97E-10	45.12	2.96E-11	45.16	9.17E-12	45.21	2.22E-10	44.95	2.77E-11	45.00	6.18E-12	45.04	5.19E-10	45.09	1.71E-10	44.79	3.01E-11	44.84	9.13E-12	44.89	3.82E-10	44.93	8.89E-11	44.95	3.59E-11	45.00	8.91E-12	45.04	5.03E-10	45.09	1.59E-10
45.30	2.07E-10	45.35	2.79E-11	45.39	1.23E-11	45.44	2.82E-10	45.40	1.84E-10	45.44	2.79E-11	45.49	6.32E-12	45.54	2.32E-10	45.35	2.10E-10	45.40	2.71E-11	45.44	5.55E-12	45.49	2.68E-10	45.23	3.11E-11	45.27	9.62E-12	45.32	4.45E-10	45.36	1.38E-10	45.07	3.16E-11	45.11	4.68E-12	45.16	3.43E-10	45.21	7.39E-11	45.25	3.39E-11	45.30	1.12E-11	45.34	4.80E-10	45.40	1.00E-10
45.58	1.61E-10	45.63	2.54E-11	45.67	7.51E-12	45.72	2.44E-10	45.68	1.75E-10	45.72	2.72E-11	45.77	5.95E-12	45.81	2.83E-10	45.63	1.91E-10	45.67	2.97E-11	45.72	6.24E-12	45.76	2.62E-10	45.51	2.62E-11	45.55	8.19E-12	45.60	3.92E-10	45.65	9.31E-11	45.39	2.98E-11	45.44	1.20E-11	45.48	2.93E-10	45.53	4.53E-11	45.54	3.20E-11	45.58	5.63E-12	45.63	3.78E-10	45.67	6.97E-11
45.88	1.91E-10	45.92	2.23E-11	45.97	1.22E-11	46.02	2.68E-10	45.96	2.20E-10	46.00	2.50E-11	46.05	1.44E-11	46.10	2.51E-10	45.91	2.15E-10	45.95	2.70E-11	46.00	4.24E-12	46.05	2.63E-10	45.79	2.86E-11	45.83	4.95E-12	45.88	3.37E-10	45.93	6.33E-11	45.67	3.20E-11	45.72	3.60E-12	45.76	2.52E-10	45.81	2.21E-11	45.81	3.30E-11	45.86	1.59E-11	45.91	3.62E-10	45.95	4.09E-11
46.16	1.51E-10	46.21	2.83E-11	46.25	8.55E-12	46.30	2.29E-10	46.24	1.72E-10	46.29	2.61E-11	46.33	5.48E-12	46.38	2.25E-10	46.20	2.00E-10	46.24	2.71E-11	46.29	5.29E-12	46.33	2.52E-10	46.09	2.70E-11	46.14	8.68E-12	46.18	2.81E-10	46.23	4.82E-11	45.96	3.06E-11	46.00	5.57E-12	46.05	2.40E-10	46.09	2.66E-11	46.09	3.43E-11	46.14	6.98E-12	46.18	2.62E-10	46.23	2.50E-11
46.44	1.43E-10	46.49	2.65E-11	46.54	6.19E-12	46.58	1.98E-10	46.52	1.67E-10	46.56	3.21E-11	46.61	4.79E-12	46.65	2.05E-10	46.48	1.97E-10	46.52	2.71E-11	46.57	2.48E-11	46.62	2.60E-10	46.37	2.68E-11	46.42	6.48E-13	46.46	2.90E-10	46.51	3.04E-11	46.24	3.00E-11	46.28	8.27E-12	46.33	1.81E-10	46.38	6.39E-12	46.36	2.84E-11	46.41	1.15E-11	46.46	2.64E-10	46.50	2.22E-11
46.74	1.59E-10	46.79	2.31E-11	46.83	6.57E-12	46.88	2.09E-10	46.80	1.75E-10	46.85	2.61E-11	46.89	4.59E-12	46.94	2.07E-10	46.76	1.87E-10	46.80	2.87E-11	46.85	4.48E-12	46.89	2.33E-10	46.66	2.99E-11	46.70	2.57E-11	46.75	1.73E-10	46.79	2.53E-11	46.51	2.88E-11	46.56	1.19E-11	46.60	1.96E-10	46.65	8.70E-12	46.65	2.92E-11	46.69	6.31E-12	46.74	2.32E-10	46.78	1.43E-11
47.01	1.00E-10	47.06	2.33E-11	47.10	5.64E-12	47.16	1.29E-10	47.08	1.31E-10	47.12	2.73E-11	47.17	9.12E-12	47.22	2.05E-10	47.04	1.58E-10	47.08	2.55E-11	47.13	6.93E-12	47.17	2.01E-10	46.93	2.88E-11	46.98	1.42E-11	47.02	2.15E-10	47.07	8.84E-12	46.79	2.59E-11	46.84	4.19E-12	46.89	1.85E-10	46.93	4.25E-12	46.93	3.08E-11	46.97	1.54E-11	47.02	2.08E-10	47.06	1.43E-11
47.30	9.36E-11	47.34	2.77E-11	47.39	4.86E-12	47.44	1.63E-10	47.36	1.42E-10	47.41	2.20E-11	47.46	6.51E-12	47.50	1.67E-10	47.31	1.33E-10	47.36	2.67E-11	47.41	1.05E-12	47.45	2.05E-10	47.23	2.43E-11	47.27	1.21E-11	47.32	2.11E-10	47.37	9.98E-12	47.08	2.83E-11	47.13	6.42E-12	47.17	1.55E-10	47.22	9.92E-12	47.22	3.12E-11	47.26	5.23E-12	47.31	1.95E-10	47.35	1.26E-11
47.60	8.79E-11	47.65	2.40E-11	47.69	1.59E-11	47.74	1.19E-10	47.64	1.08E-10	47.69	2.44E-11	47.73	4.59E-12	47.78	1.40E-10	47.59	1.25E-10	47.64	2.61E-11	47.68	1.33E-11	47.73	1.69E-10	47.50	2.98E-11	47.55	1.13E-11	47.60	1.49E-10	47.64	7.58E-12	47.36	2.96E-11	47.41	1.04E-11	47.45	1.56E-10	47.50	4.59E-12	47.50	3.20E-11	47.55	1.07E-11	47.59	1.78E-10	47.64	5.25E-12
47.88	7.98E-11	47.92	2.46E-11	47.97	1.14E-11	48.02	7.73E-11	47.92	7.49E-11	47.97	2.72E-11	48.01	5.62E-12	48.06	9.73E-11	47.87	1.11E-10	47.91	2.66E-11	47.96	1.34E-11	48.00	1.49E-10	47.78	3.07E-11	47.83	6.50E-12	47.88	1.48E-10	47.93	1.16E-11	47.64	3.17E-11	47.69	5.72E-12	47.74	1.43E-10	47.78	4.86E-12	47.78	3.12E-11	47.82	9.73E-12	47.87	1.93E-10	47.92	1.12E-11
48.17	5.94E-11	48.21	2.91E-11	48.26	1.40E-11	48.31	7.31E-11	48.20	6.72E-11	48.25	2.83E-11	48.29	5.74E-12	48.34	8.34E-11	48.15	9.21E-11	48.19	2.78E-11	48.24	5.47E-12	48.28	1.16E-10	48.07	3.17E-11	48.11	8.25E-12	48.16	1.40E-10	48.20	4.27E-12	47.93	2.95E-11	47.97	3.22E-12	48.02	1.33E-10	48.06	7.84E-12	48.08	3.00E-11	48.13	4.40E-12	48.17	1.70E-10	48.22	5.35E-12
48.45	5.36E-11	48.49	2.33E-11	48.54	4.00E-12	48.58	5.33E-11	48.49	4.95E-11	48.53	2.38E-11	48.58	1.03E-12	48.62	6.53E-11	48.43	5.36E-11	48.47	2.71E-11	48.52	8.58E-12	48.56	8.08E-11	48.34	2.92E-11	48.39	8.63E-12	48.43	1.29E-10	48.48	4.73E-12	48.20	3.21E-11	48.25	5.00E-12	48.30	1.32E-10	48.34	3.42E-12	48.36	3.04E-11	48.40	8.62E-12	48.45	1.50E-10	48.50	6.99E-12
48.72	4.08E-11	48.77	2.09E-11	48.81	5.43E-12	48.86	3.08E-11	48.77	4.70E-11	48.81	2.40E-11	48.86	6.10E-12	48.90	5.39E-11	48.72	4.95E-11	48.77	2.72E-11	48.81	7.84E-12	48.86	5.78E-11	48.62	2.95E-11	48.66	1.17E-11	48.71	1.61E-10	48.76	1.03E-11	48.48	2.83E-11	48.53	6.39E-13	48.58	1.40E-10	48.62	8.20E-12	48.65	2.83E-11	48.70	1.47E-11	48.74	1.34E-10	48.79	4.25E-12
49.00	4.51E-11	49.04	2.26E-11	49.09	6.86E-12	49.14	4.25E-11	49.04	3.02E-11	49.09	2.52E-11	49.13	6.14E-12	49.18	3.18E-11	49.00	4.46E-11	49.05	3.09E-11	49.09	1.01E-11	49.14	4.01E-11	48.91	3.02E-11	48.95	5.07E-12	49.00	1.35E-10	49.04	6.41E-12	48.76	3.06E-11	48.81	4.74E-12	48.85	1.32E-10	48.90	3.32E-12	48.93	2.74E-11	48.97	6.06E-12	49.02	1.52E-10	49.06	3.70E-12
49.28	2.97E-11	49.32	2.74E-11	49.37	1.06E-11	49.41	3.76E-11	49.32	3.92E-11	49.37	2.56E-11	49.41	6.26E-12	49.46	3.54E-11	49.28	3.07E-11	49.33	2.71E-11	49.37	4.21E-12	49.42	4.21E-11	49.19	2.55E-11	49.23	9.47E-12	49.28	1.43E-10	49.33	7.01E-12	49.05	3.14E-11	49.09	7.39E-13	49.14	1.33E-10	49.19	2.83E-12	49.20	3.04E-11	49.25	4.30E-12	49.29	1.40E-10	49.34	1.40E-11
49.55	3.21E-11	49.60	2.28E-11	49.65	9.68E-12	49.69	1.96E-11	49.61	3.14E-11	49.65	2.80E-11	49.70	1.03E-12	49.74	2.55E-11	49.56	3.98E-11	49.60	2.60E-11	49.65	5.69E-12	49.69	4.42E-11	49.47	2.54E-11	49.51	2.28E-11	49.56	9.96E-11	49.60	1.63E-11	49.33	2.95E-11	49.38	1.13E-11	49.42	1.27E-10	49.47	6.05E-13	49.48	3.24E-11	49.53	4.57E-12	49.57	1.67E-10	49.62	2.56E-12
49.83	2.24E-11	49.88	2.68E-11	49.92	6.76E-12	49.97	2.47E-11	49.89	1.62E-11	49.94	2.36E-11	49.98	1.07E-12	50.03	1.83E-11	49.84	2.37E-11	49.89	2.46E-11	49.93	9.22E-12	49.98	2.95E-11	49.75	2.60E-11	49.80	6.70E-12	49.84	1.34E-10	49.89	8.09E-12	49.61	3.13E-11	49.66	6.92E-12	49.70	1.18E-10	49.75	7.36E-13	49.76	3.05E-11	49.81	4.57E-12	49.85	1.47E-10	49.90	5.56E-12
50.11	3.57E-11	50.15	2.50E-11	50.20	1.64E-11	50.25	2.67E-11	50.19	1.93E-11	50.24	2.58E-11	50.28	1.30E-11	50.33	6.44E-12	50.12	2.48E-11	50.16	2.58E-11	50.21	5.15E-12	50.25	2.13E-11	50.03	2.63E-11	50.07	9.97E-12	50.12	1.59E-10	50.17	5.50E-12	49.89	3.05E-11	49.93	1.06E-11	49.98	1.22E-10	50.03	3.94E-12	50.04	2.86E-11	50.09	5.63E-12	50.14	1.49E-10	50.18	4.67E-12
50.40	7.64E-12	50.44	2.08E-11	50.49	9.19E-12	50.54	2.05E-11	50.47	2.09E-11	50.52	2.77E-11	50.56	6.62E-12	50.61	6.57E-12	50.40	2.31E-11	50.44	2.84E-11	50.49	8.64E-12	50.53	1.72E-11	50.31	2.50E-11	50.36	7.77E-12	50.40	1.20E-10	50.45	5.31E-12	50.17	2.83E-11	50.21	9.34E-12	50.26	1.26E-10	50.30	3.10E-13	50.33	2.84E-11	50.37	9.85E-12	50.42	1.36E-10	50.46	3.68E-12
50.68	1.94E-11	50.72	2.45E-11	50.77	8.40E-12	50.82	9.06E-12	50.75	7.27E-12	50.79	3.07E-11	50.84	6.41E-12	50.88	1.19E-11	50.67	5.71E-12	50.72	2.56E-11	50.76	4.54E-12	50.81	1.56E-11	50.60	2.74E-11	50.64	8.74E-12	50.69	1.49E-10	50.73	6.34E-12	50.48	3.09E-11	50.52	8.98E-12	50.57	1.05E-10	50.62	7.19E-12	50.60	2.96E-11	50.65	1.10E-12	50.70	1.22E-10	50.74	5.43E-12
50.96	2.02E-11	51.01	2.14E-11	51.05	1.37E-11	51.10	7.75E-12	51.03	7.43E-12	51.07	2.29E-11	51.12	5.22E-12	51.16	6.35E-12	50.95	2.33E-11	51.00	2.76E-11	51.04	5.21E-12	51.09	1.47E-11	50.88	3.20E-11	50.92	7.82E-12	50.97	1.28E-10	51.01	8.35E-12	50.75	2.85E-11	50.80	9.63E-12	50.85	1.17E-10	50.90	2.96E-12	50.89	2.83E-11	50.93	8.39E-12	50.98	1.33E-10	51.02	2.38E-12
51.24	7.59E-12	51.29	1.72E-11	51.33	8.08E-12	51.38	1.28E-11	51.30	8.68E-12	51.35	2.61E-11	51.39	7.66E-12	51.44	6.40E-12	51.24	1.51E-11	51.28	2.65E-11	51.33	5.15E-12	51.38	8.51E-12	51.15	2.63E-11	51.20	5.63E-12	51.25	1.37E-10	51.29	8.23E-12	51.04	2.83E-11	51.08	6.93E-12	51.13	1.42E-10	51.17	7.04E-12	51.17	2.91E-11	51.21	1.19E-11	51.26	1.37E-10	51.30	1.13E-12
51.52	1.18E-11	51.57	2.49E-11	51.61	8.57E-12	51.66	4.20E-12	51.61	6.96E-12	51.65	2.57E-11	51.70	8.56E-12	51.74	4.36E-12	51.52	1.51E-11	51.57	3.04E-11	51.61	9.17E-12	51.66	7.19E-13	51.44	2.59E-11	51.48	7.05E-12	51.53	1.01E-10	51.58	5.60E-12	51.31	2.89E-11	51.36	5.44E-12	51.40	1.09E-10	51.45	6.30E-13	51.45	2.94E-11	51.49	3.89E-12	51.54	1.30E-10	51.58	1.15E-11
51.80	9.99E-12	51.85	2.73E-11	51.90	6.26E-12	51.94	1.53E-13	51.88	6.62E-12	51.93	2.34E-11	51.97	1.09E-11	52.02	5.30E-12	51.81	1.45E-11	51.85	2.56E-11	51.90	3.95E-12	51.95	9.09E-12	51.72	2.19E-11	51.77	1.46E-11	51.82	9.23E-11	51.86	4.71E-12	51.59	2.75E-11	51.63	5.43E-12	51.68	1.05E-10	51.73	6.22E-13	51.73	2.80E-11	51.77	1.28E-11	51.82	1.37E-10	51.86	1.00E-11
52.09	9.30E-12	52.13	1.98E-11	52.18	3.58E-12	52.22	7.14E-12	52.16	5.73E-12	52.21	2.69E-11	52.25	4.52E-12	52.30	8.45E-12	52.11	5.58E-12	52.16	2.56E-11	52.20	9.38E-12	52.25	3.80E-12	52.01	3.13E-11	52.05	6.48E-12	52.10	1.32E-10	52.14	5.10E-12	51.88	2.52E-11	51.93	6.76E-12	51.97	1.22E-10	52.02	8.49E-12	52.01	3.08E-11	52.05	1.38E-11	52.10	1.38E-10	52.15	3.30E-12
52.36	1.87E-11	52.41	2.37E-11	52.45	1.49E-13	52.50	2.06E-13	52.44	1.83E-11	52.49	2.59E-11	52.54	6.12E-12	52.58	4.71E-12	52.40	9.87E-12	52.44	2.67E-11	52.49	1.04E-12	52.53	6.85E-12	52.28	2.79E-11	52.33	7.13E-12	52.37	1.31E-10	52.42	7.40E-12	52.16	2.98E-11	52.21	4.33E-12	52.25	1.12E-10	52.30	1.98E-12	52.29	3.39E-11	52.33	5.15E-12	52.38	1.16E-10	52.42	4.08E-12
52.64	1.79E-11	52.69	2.26E-11	52.73	7.09E-12	52.79	3.60E-12	52.72	6.80E-12	52.77	2.41E-11	52.82	7.19E-12	52.86	6.00E-12	52.68	4.99E-12	52.73	2.71E-11	52.77	5.00E-12	52.82	7.13E-13	52.56	3.11E-11	52.61	1.13E-11	52.66	1.25E-10	52.70	6.01E-12	52.44	3.06E-11	52.49	4.67E-12	52.53	1.10E-10	52.58	2.44E-12	52.56	3.15E-11	52.61	4.99E-12	52.66	1.21E-10	52.70	5.13E-12
52.93	9.43E-12	52.97	2.75E-11	53.02	7.05E-12	53.07	3.08E-12	53.01	1.43E-11	53.05	2.44E-11	53.10	2.78E-12	53.14	1.09E-11	52.96	1.24E-11	53.00	2.81E-11	53.05	3.69E-12	53.10	4.01E-12	52.84	2.58E-11	52.89	3.98E-13	52.93	1.19E-10	52.98	3.00E-12	52.72	2.70E-11	52.76	6.93E-13	52.81	1.08E-10	52.86	5.01E-13	52.85	2.78E-11	52.89	6.57E-12	52.94	1.43E-10	52.98	5.60E-12
53.21	8.18E-12	53.25	1.90E-11	53.30	4.51E-12	53.34	2.02E-13	53.29	2.02E-11	53.34	2.36E-11	53.39	6.34E-12	53.43	6.05E-12	53.24	1.29E-11	53.28	2.82E-11	53.33	5.37E-12	53.37	3.95E-12	53.12	2.78E-11	53.16	4.19E-12	53.21	1.30E-10	53.26	6.97E-12	53.00	3.06E-11	53.05	7.84E-12	53.09	9.31E-11	53.14	4.87E-12	53.13	2.91E-11	53.17	5.52E-12	53.22	1.10E-10	53.26	4.27E-12
53.49	1.91E-11	53.54	2.06E-11	53.58	9.68E-12	53.63	3.77E-12	53.60	1.31E-11	53.64	2.51E-11	53.69	3.88E-12	53.73	4.98E-13	53.51	5.27E-12	53.56	2.44E-11	53.60	4.40E-12	53.65	3.07E-12	53.39	2.23E-11	53.44	7.77E-12	53.49	1.28E-10	53.53	4.56E-12	53.28	2.45E-11	53.33	5.01E-12	53.38	1.22E-10	53.42	5.70E-12	53.41	2.91E-11	53.45	5.59E-12	53.50	1.35E-10	53.54	7.05E-12
53.78	7.30E-12	53.82	2.57E-11	53.87	1.29E-11	53.91	-9.24E-14	53.89	1.20E-11	53.93	2.81E-11	53.98	1.04E-11	54.02	3.03E-12	53.79	4.96E-12	53.84	3.02E-11	53.88	1.04E-11	53.93	1.13E-11	53.67	2.74E-11	53.72	9.37E-12	53.76	1.18E-10	53.81	6.16E-12	53.56	3.04E-11	53.61	3.98E-12	53.65	1.09E-10	53.70	2.08E-12	53.69	2.87E-11	53.73	1.44E-11	53.78	1.27E-10	53.82	4.63E-12
54.06	1.97E-11	54.11	2.12E-11	54.15	9.38E-12	54.20	4.95E-12	54.16	1.54E-11	54.21	2.41E-11	54.26	2.68E-12	54.31	3.01E-12	54.09	5.43E-12	54.14	2.60E-11	54.18	1.35E-11	54.23	6.69E-13	53.95	2.54E-11	53.99	5.23E-12	54.04	1.13E-10	54.09	3.03E-12	53.85	3.32E-11	53.89	2.50E-12	53.94	1.06E-10	53.99	4.26E-12	53.97	3.03E-11	54.01	5.74E-12	54.06	1.39E-10	54.10	3.20E-12
54.34	1.83E-11	54.39	2.35E-11	54.43	1.21E-11	54.48	3.54E-12	54.45	8.47E-12	54.50	2.32E-11	54.55	7.24E-12	54.60	6.55E-13	54.37	1.32E-11	54.42	2.49E-11	54.46	6.08E-12	54.51	8.19E-12	54.23	2.54E-11	54.27	5.51E-12	54.32	1.32E-10	54.37	7.05E-12	54.13	2.81E-11	54.17	1.11E-11	54.22	1.07E-10	54.26	2.51E-12	54.25	3.09E-11	54.30	7.33E-12	54.34	9.87E-11	54.39	5.64E-12
54.61	1.43E-11	54.66	2.11E-11	54.71	2.26E-13	54.75	5.38E-12	54.74	7.00E-12	54.79	2.66E-11	54.83	1.06E-12	54.88	3.99E-12	54.65	8.59E-12	54.69	2.76E-11	54.74	5.55E-12	54.78	2.33E-12	54.51	2.86E-11	54.56	5.65E-12	54.61	1.21E-10	54.65	5.59E-12	54.40	3.00E-11	54.45	6.97E-12	54.50	1.10E-10	54.54	4.41E-12	54.54	2.75E-11	54.58	8.86E-12	54.63	1.29E-10	54.67	9.39E-12
54.90	7.92E-12	54.95	2.09E-11	54.99	4.54E-12	55.04	3.93E-12	55.02	6.56E-12	55.07	2.26E-11	55.11	5.06E-12	55.16	9.00E-12	54.93	7.42E-12	54.97	2.57E-11	55.02	4.53E-12	55.06	2.89E-12	54.79	2.68E-11	54.84	8.11E-12	54.88	1.32E-10	54.93	5.02E-12	54.68	2.64E-11	54.73	5.01E-12	54.78	1.15E-10	54.82	3.82E-12	54.83	2.81E-11	54.87	8.27E-12	54.92	1.23E-10	54.96	7.63E-12
55.18	8.24E-12	55.23	2.26E-11	55.27	5.89E-12	55.32	3.55E-12	55.32	5.56E-12	55.37	2.58E-11	55.41	9.61E-12	55.46	3.62E-12	55.20	1.44E-11	55.25	2.62E-11	55.29	6.34E-12	55.34	3.16E-12	55.07	2.63E-11	55.11	8.70E-12	55.16	1.32E-10	55.21	1.03E-12	54.96	2.63E-11	55.00	1.04E-11	55.05	1.03E-10	55.10	5.82E-12	55.11	3.01E-11	55.15	1.17E-11	55.20	1.06E-10	55.24	3.22E-12
55.47	1.01E-11	55.51	2.55E-11	55.56	6.17E-12	55.60	4.38E-13	55.61	1.93E-11	55.66	2.32E-11	55.71	5.96E-12	55.75	4.90E-12	55.48	5.34E-12	55.53	2.81E-11	55.57	6.13E-12	55.62	2.75E-12	55.35	2.59E-11	55.40	4.97E-12	55.44	1.01E-10	55.49	6.62E-12	55.23	3.00E-11	55.28	7.98E-12	55.33	1.10E-10	55.37	4.76E-13	55.39	2.95E-11	55.43	5.35E-12	55.48	1.15E-10	55.52	1.75E-12
55.74	1.11E-11	55.79	2.34E-11	55.84	6.34E-12	55.88	1.04E-13	55.90	7.40E-12	55.94	2.52E-11	55.99	4.60E-12	56.04	4.79E-12	55.76	6.94E-12	55.80	2.60E-11	55.85	4.39E-12	55.90	6.44E-13	55.65	3.19E-11	55.69	8.18E-12	55.74	1.12E-10	55.79	9.84E-13	55.52	3.12E-11	55.56	1.75E-11	55.61	1.29E-10	55.65	4.71E-12	55.69	2.74E-11	55.73	8.56E-12	55.78	1.06E-10	55.82	5.49E-12
56.03	3.75E-12	56.07	1.93E-11	56.12	1.34E-11	56.16	-1.53E-13	56.18	1.55E-11	56.23	2.58E-11	56.28	5.37E-12	56.32	2.76E-12	56.05	1.69E-11	56.09	2.71E-11	56.14	5.54E-12	56.18	3.24E-12	55.93	3.10E-11	55.97	1.19E-11	56.02	1.20E-10	56.06	5.22E-13	55.79	2.86E-11	55.84	4.27E-12	55.88	9.81E-11	55.93	9.78E-12	55.97	2.91E-11	56.01	1.08E-11	56.06	1.18E-10	56.11	3.43E-12
56.30	1.77E-11	56.35	1.98E-11	56.39	3.18E-13	56.44	3.54E-12	56.47	6.65E-12	56.52	2.57E-11	56.57	4.55E-12	56.61	2.21E-12	56.32	4.89E-12	56.37	2.62E-11	56.42	1.26E-11	56.46	4.10E-12	56.21	2.70E-11	56.25	6.71E-12	56.30	9.93E-11	56.35	8.40E-12	56.09	3.11E-11	56.13	7.43E-13	56.18	1.34E-10	56.23	4.23E-12	56.25	3.31E-11	56.29	5.11E-12	56.34	1.19E-10	56.38	2.86E-12
56.58	7.94E-12	56.63	2.11E-11	56.68	1.10E-11	56.72	-3.84E-14	56.76	1.38E-11	56.80	2.49E-11	56.85	1.12E-12	56.89	6.61E-12	56.60	4.78E-12	56.65	2.51E-11	56.69	4.51E-12	56.74	4.05E-12	56.49	2.70E-11	56.53	4.68E-12	56.58	1.27E-10	56.63	8.05E-13	56.37	3.00E-11	56.42	5.69E-12	56.46	9.23E-11	56.51	4.17E-12	56.53	3.02E-11	56.57	1.13E-11	56.62	1.24E-10	56.67	4.22E-12
56.87	7.57E-12	56.91	1.91E-11	56.96	9.28E-12	57.00	3.43E-12	57.03	5.15E-12	57.08	2.30E-11	57.13	4.77E-12	57.18	4.62E-12	56.88	1.57E-11	56.93	2.47E-11	56.97	5.81E-12	57.02	6.00E-12	56.77	2.26E-11	56.82	4.61E-13	56.86	1.16E-10	56.91	4.94E-12	56.65	3.18E-11	56.70	4.59E-12	56.74	1.24E-10	56.79	2.21E-12	56.81	3.08E-11	56.85	4.54E-12	56.90	1.24E-10	56.95	3.63E-12
57.16	1.07E-11	57.21	2.28E-11	57.25	8.57E-12	57.30	2.99E-13	57.34	3.12E-12	57.38	2.41E-11	57.43	5.15E-12	57.47	4.74E-12	57.16	1.65E-11	57.20	2.67E-11	57.25	5.23E-12	57.30	2.83E-12	57.05	2.91E-11	57.10	7.48E-12	57.14	1.05E-10	57.19	4.37E-12	56.93	2.78E-11	56.97	4.70E-12	57.02	1.02E-10	57.07	5.57E-12	57.09	2.87E-11	57.14	5.04E-12	57.19	1.23E-10	57.23	3.13E-12
57.44	5.17E-12	57.48	1.98E-11	57.53	5.13E-12	57.58	3.93E-12	57.61	5.61E-12	57.66	2.82E-11	57.71	4.77E-12	57.76	2.82E-12	57.45	8.38E-12	57.49	2.67E-11	57.54	4.66E-12	57.59	2.46E-12	57.33	2.79E-11	57.37	5.02E-12	57.42	8.27E-11	57.46	4.49E-12	57.22	3.07E-11	57.26	9.56E-12	57.31	1.22E-10	57.36	1.86E-12	57.38	3.04E-11	57.42	7.45E-12	57.47	1.14E-10	57.51	3.68E-12
57.72	9.48E-12	57.76	2.09E-11	57.81	3.59E-12	57.85	1.45E-13	57.90	6.35E-12	57.94	2.36E-11	57.99	1.28E-11	58.04	2.76E-12	57.74	1.84E-11	57.78	2.51E-11	57.83	3.89E-12	57.87	2.98E-12	57.61	2.56E-11	57.65	5.14E-12	57.70	1.33E-10	57.75	4.40E-12	57.50	3.11E-11	57.54	1.01E-11	57.59	1.14E-10	57.64	3.76E-12	57.66	2.99E-11	57.71	5.77E-12	57.75	1.06E-10	57.80	2.47E-12
58.00	1.70E-12	58.04	2.54E-11	58.09	6.44E-12	58.14	1.68E-13	58.19	6.32E-12	58.23	2.86E-11	58.28	3.26E-12	58.33	1.46E-12	58.01	5.71E-12	58.06	2.63E-11	58.10	1.37E-11	58.15	5.11E-13	57.89	2.59E-11	57.93	5.83E-12	57.98	1.25E-10	58.02	8.38E-12	57.79	2.95E-11	57.83	7.84E-12	57.88	1.30E-10	57.93	3.02E-12	57.94	3.08E-11	57.99	4.44E-12	58.04	1.14E-10	58.08	3.60E-12
58.28	2.08E-12	58.32	2.28E-11	58.37	4.53E-12	58.42	3.44E-12	58.47	9.73E-12	58.52	2.46E-11	58.56	5.60E-12	58.61	9.35E-12	58.29	5.30E-12	58.34	2.78E-11	58.39	1.00E-11	58.43	5.68E-12	58.17	2.51E-11	58.21	1.48E-11	58.26	1.36E-10	58.31	4.48E-12	58.07	2.74E-11	58.11	4.78E-12	58.16	1.05E-10	58.20	3.68E-12	58.23	2.90E-11	58.27	1.05E-11	58.32	1.14E-10	58.37	4.16E-12
58.57	5.06E-12	58.61	1.95E-11	58.66	3.93E-13	58.70	1.56E-12	58.75	1.54E-11	58.80	2.55E-11	58.85	1.01E-11	58.89	2.79E-12	58.57	1.16E-11	58.61	2.55E-11	58.66	8.64E-12	58.71	6.28E-13	58.45	2.57E-11	58.49	5.34E-13	58.54	1.12E-10	58.58	9.85E-13	58.35	2.73E-11	58.40	5.59E-12	58.45	1.06E-10	58.49	2.61E-12	58.50	3.11E-11	58.55	1.08E-11	58.60	1.09E-10	58.64	4.24E-13
58.84	1.73E-12	58.89	2.09E-11	58.93	5.60E-12	58.98	3.20E-12	59.05	8.68E-12	59.09	2.33E-11	59.14	1.73E-11	59.18	1.75E-12	58.85	8.06E-12	58.90	2.52E-11	58.94	1.38E-11	58.99	2.71E-12	58.73	2.43E-11	58.77	5.45E-12	58.82	1.08E-10	58.87	1.03E-12	58.63	2.82E-11	58.68	1.10E-11	58.72	1.12E-10	58.77	6.76E-13	58.78	2.96E-11	58.83	1.15E-11	58.87	1.30E-10	58.92	4.35E-12
59.12	9.05E-12	59.17	2.35E-11	59.21	5.01E-12	59.26	2.04E-12	59.33	6.43E-12	59.38	2.84E-11	59.42	4.03E-12	59.47	1.59E-12	59.13	1.09E-11	59.18	2.68E-11	59.22	5.97E-12	59.27	4.91E-12	59.01	2.26E-11	59.05	8.66E-12	59.10	1.23E-10	59.14	9.57E-12	58.91	2.42E-11	58.96	4.19E-12	59.00	8.73E-11	59.05	4.16E-12	59.07	3.04E-11	59.11	1.52E-11	59.16	1.28E-10	59.20	5.29E-13
59.41	7.60E-12	59.46	2.60E-11	59.50	4.19E-12	59.55	3.75E-12	59.61	5.45E-12	59.66	2.37E-11	59.70	6.96E-12	59.75	1.78E-12	59.41	7.04E-12	59.45	2.62E-11	59.50	4.71E-12	59.54	8.51E-12	59.29	2.85E-11	59.34	8.48E-12	59.39	1.20E-10	59.43	6.03E-12	59.19	3.04E-11	59.24	5.00E-12	59.28	9.74E-11	59.33	7.12E-13	59.34	2.89E-11	59.39	3.31E-12	59.44	1.39E-10	59.48	4.55E-12
59.70	5.43E-12	59.75	1.81E-11	59.79	2.90E-12	59.84	6.51E-12	59.89	3.99E-12	59.94	2.81E-11	59.98	6.51E-12	60.03	3.28E-12	59.69	1.14E-11	59.73	2.55E-11	59.78	1.03E-11	59.82	2.05E-12	59.58	2.75E-11	59.63	5.56E-12	59.67	1.28E-10	59.72	7.62E-13	59.49	3.21E-11	59.54	5.26E-12	59.59	1.21E-10	59.63	1.01E-11	59.62	2.69E-11	59.67	3.95E-12	59.72	1.07E-10	59.76	6.70E-12
59.98	9.51E-12	60.02	2.08E-11	60.07	7.62E-12	60.11	5.66E-12	60.17	4.77E-12	60.22	2.92E-11	60.26	4.60E-12	60.31	2.51E-12	59.96	5.14E-12	60.01	2.74E-11	60.06	4.80E-12	60.10	3.51E-12	59.87	2.76E-11	59.92	6.72E-12	59.97	1.16E-10	60.01	1.07E-12	59.79	3.09E-11	59.84	6.10E-12	59.88	1.07E-10	59.93	4.28E-12	59.92	2.83E-11	59.97	7.63E-12	60.01	9.57E-11	60.06	5.29E-12
60.26	6.92E-12	60.30	2.28E-11	60.35	7.06E-12	60.39	3.57E-12	60.45	5.30E-12	60.49	2.44E-11	60.54	2.70E-12	60.59	6.33E-13	60.24	1.13E-11	60.29	2.48E-11	60.33	7.78E-12	60.38	6.05E-12	60.15	2.41E-11	60.20	8.13E-12	60.24	1.32E-10	60.29	4.61E-12	60.08	3.09E-11	60.12	2.72E-12	60.17	9.95E-11	60.22	2.48E-12	60.21	3.31E-11	60.25	8.56E-12	60.30	1.22E-10	60.34	5.07E-13
