# Supplementary material for: A new method to quantify particulate sodium and potassium salts (nitrate, chloride, and sulfate) by thermal desorption aerosol mass spectrometry
Source: Copernicus journal article supplement (doi:10.5194/amt-2021-228), 2021-08-26
Supplement: Supplementary file 1 [file amt-2021-228-supplement.zip › Fig 5.csv]

ElapsedTime_mz23_Seawater	IonSignal_mz23_Seawater	ElapsedTime_mz36_Seawater	IonSignal_mz36_Seawater	ElapsedTime_mz48_Seawater	IonSignal_mz48_Seawater	ElapsedTime_mz23_Swawater+SN	IonSignal_mz23_Swawater+SN	ElapsedTime_mz30_Swawater+SN	IonSignal_mz30_Swawater+SN	ElapsedTime_mz36_Swawater+SN	IonSignal_mz36_Swawater+SN	ElapsedTime_mz23_Seawater+SS	IonSignal_mz23_Seawater+SS	ElapsedTime_mz36_Seawater+SS	IonSignal_mz36_Seawater+SS	ElapsedTime_mz48_Seawater+SS	IonSignal_mz48_Seawater+SS
-1.215	4.56E-12	-1.170	2.98E-12	-1.124	5.97E-13	-1.153	2.89E-12	-1.107	4.99E-11	-1.062	3.18E-12	-1.275	8.08E-13	-1.230	2.89E-12	-1.184	2.10E-13
-0.9409	8.80E-13	-0.8949	3.91E-12	-0.8500	4.67E-13	-0.9041	5.91E-12	-0.8580	4.94E-11	-0.8130	6.78E-12	-0.9930	1.10E-11	-0.9460	5.81E-13	-0.9010	1.80E-13
-0.6580	5.01E-13	-0.6100	8.00E-13	-0.5649	3.87E-13	-0.6720	4.58E-12	-0.6270	4.13E-11	-0.5811	2.42E-13	-0.7061	3.78E-12	-0.6600	3.62E-13	-0.6150	2.91E-12
-0.3739	5.62E-12	-0.3250	5.38E-13	-0.2799	2.61E-13	-0.4449	7.68E-13	-0.4000	4.72E-11	-0.3540	2.65E-12	-0.4301	1.37E-11	-0.3840	6.23E-13	-0.3390	6.92E-13
-0.09290	3.84E-12	-0.04700	2.57E-12	-0.001953	2.06E-13	-0.2150	2.95E-12	-0.1689	4.66E-11	-0.1240	4.53E-12	-0.1520	6.71E-12	-0.1040	7.76E-13	-0.05798	2.38E-12
0.1941	7.42E-12	0.2400	4.87E-12	0.2850	3.13E-12	0.0131	4.61E-12	0.0580	4.85E-11	0.1030	6.81E-13	0.1279	5.86E-12	0.1740	1.55E-12	0.2219	1.80E-13
0.4701	7.46E-13	0.5160	2.26E-12	0.5610	1.37E-12	0.2400	2.57E-12	0.2860	4.68E-11	0.3311	7.90E-13	0.4139	4.07E-12	0.4609	4.17E-12	0.5060	3.57E-13
0.7511	6.14E-13	0.7960	8.46E-13	0.8420	2.52E-13	0.4780	2.61E-12	0.5229	4.73E-11	0.5690	9.01E-13	0.6920	4.33E-12	0.7410	1.89E-12	0.7870	2.22E-13
1.032	1.68E-12	1.077	2.03E-12	1.125	5.61E-13	0.709	2.24E-12	0.754	5.40E-11	0.800	8.06E-13	0.974	8.54E-13	1.020	2.26E-12	1.065	6.37E-13
1.316	6.73E-13	1.364	2.23E-12	1.414	5.06E-13	0.940	5.79E-13	0.985	5.08E-11	1.031	3.38E-12	1.247	9.65E-13	1.293	1.62E-12	1.339	8.91E-14
1.607	8.23E-13	1.652	4.67E-12	1.700	1.82E-13	1.167	6.19E-12	1.215	5.44E-11	1.260	3.67E-13	1.520	6.17E-12	1.566	2.88E-12	1.611	1.74E-13
1.899	2.79E-12	1.944	4.45E-12	1.990	4.48E-12	1.404	5.23E-12	1.450	4.63E-11	1.496	7.30E-13	1.794	5.75E-12	1.848	7.74E-12	1.895	7.63E-13
2.193	7.49E-13	2.239	6.18E-12	2.285	1.71E-14	1.635	6.29E-12	1.682	4.73E-11	1.727	2.48E-12	2.091	6.69E-12	2.137	1.39E-11	2.182	6.88E-13
2.473	1.12E-11	2.521	1.59E-11	2.571	1.94E-13	1.864	4.87E-12	1.910	4.71E-11	1.955	7.00E-13	2.374	5.54E-12	2.420	3.04E-11	2.467	6.19E-13
2.756	2.40E-12	2.801	2.87E-11	2.848	6.93E-13	2.092	3.09E-12	2.137	5.20E-11	2.183	3.95E-13	2.660	9.35E-12	2.705	2.98E-11	2.751	2.58E-13
3.038	9.90E-13	3.084	7.72E-12	3.129	5.88E-13	2.320	5.30E-12	2.365	5.14E-11	2.410	3.97E-12	2.932	7.45E-12	2.978	2.74E-11	3.025	6.67E-13
3.326	1.98E-12	3.373	8.79E-12	3.420	2.38E-12	2.560	5.67E-12	2.605	4.91E-11	2.651	4.23E-12	3.206	4.24E-12	3.253	1.19E-11	3.298	2.63E-13
3.616	2.75E-12	3.661	7.62E-12	3.711	2.49E-13	2.789	7.57E-13	2.835	4.82E-11	2.880	8.59E-13	3.485	1.80E-11	3.533	3.52E-12	3.579	4.32E-13
3.901	1.42E-12	3.946	9.32E-12	3.993	2.20E-13	3.017	4.40E-12	3.064	5.29E-11	3.109	4.16E-12	3.772	1.05E-11	3.824	1.09E-11	3.874	4.35E-13
4.191	3.19E-12	4.237	2.95E-12	4.286	6.87E-13	3.246	6.07E-12	3.291	4.63E-11	3.336	1.61E-12	4.056	6.92E-12	4.102	4.93E-12	4.147	4.18E-13
4.475	9.90E-13	4.520	9.15E-13	4.566	2.65E-13	3.477	5.48E-12	3.526	4.91E-11	3.572	5.21E-13	4.333	6.48E-12	4.378	3.44E-12	4.430	4.92E-13
4.749	7.22E-13	4.795	6.52E-12	4.843	2.36E-12	3.721	1.20E-12	3.771	4.48E-11	3.817	6.86E-13	4.614	9.11E-13	4.660	8.98E-13	4.705	2.25E-13
5.029	1.83E-12	5.074	5.90E-12	5.120	1.65E-13	3.970	6.59E-12	4.015	5.11E-11	4.061	8.22E-13	4.912	8.59E-13	4.957	9.65E-12	5.003	3.17E-12
5.313	5.81E-12	5.360	4.33E-12	5.408	3.90E-13	4.197	4.43E-12	4.244	4.86E-11	4.290	4.24E-13	5.190	8.31E-12	5.239	8.31E-12	5.287	4.96E-13
5.590	6.95E-12	5.636	6.59E-12	5.681	4.58E-13	4.433	4.89E-12	4.479	4.44E-11	4.524	1.90E-12	5.479	5.90E-12	5.527	9.62E-13	5.573	2.78E-13
5.869	3.64E-12	5.914	1.96E-11	5.960	3.54E-13	4.666	6.67E-12	4.713	4.78E-11	4.759	5.96E-12	5.766	1.87E-12	5.811	3.21E-12	5.858	6.27E-13
6.145	2.14E-12	6.190	1.78E-11	6.235	2.17E-13	4.899	8.14E-13	4.944	5.53E-11	4.990	8.25E-12	6.046	6.54E-13	6.091	7.85E-12	6.141	7.30E-13
6.420	1.09E-11	6.466	1.06E-11	6.512	3.64E-13	5.127	3.46E-12	5.173	5.27E-11	5.218	3.28E-12	6.335	6.22E-12	6.383	6.82E-13	6.429	2.28E-13
6.698	5.83E-12	6.746	6.33E-12	6.792	7.69E-13	5.365	1.13E-11	5.411	5.55E-11	5.456	3.33E-12	6.616	6.64E-12	6.662	6.59E-12	6.707	1.45E-12
6.974	3.97E-12	7.021	2.20E-11	7.068	9.75E-13	5.595	4.90E-12	5.641	5.81E-11	5.687	2.72E-12	6.906	5.27E-12	6.953	8.71E-13	6.999	7.57E-13
7.264	2.44E-12	7.310	5.21E-12	7.356	1.17E-13	5.825	5.60E-12	5.872	6.01E-11	5.918	7.17E-13	7.204	1.19E-11	7.249	5.49E-12	7.295	3.41E-12
7.545	8.83E-13	7.592	1.81E-11	7.638	5.50E-13	6.068	1.27E-11	6.114	6.44E-11	6.160	4.42E-12	7.479	4.50E-12	7.527	6.76E-13	7.572	5.29E-13
7.835	2.92E-12	7.882	7.83E-12	7.928	3.28E-13	6.302	6.80E-12	6.348	7.38E-11	6.393	5.62E-12	7.768	1.11E-11	7.813	6.80E-12	7.859	5.06E-13
8.123	8.95E-13	8.169	2.84E-11	8.214	2.17E-13	6.539	3.52E-11	6.584	8.10E-11	6.632	3.13E-12	8.049	8.36E-12	8.095	1.13E-11	8.141	5.26E-13
8.407	6.72E-12	8.458	9.04E-12	8.504	7.33E-13	6.779	3.51E-11	6.825	9.61E-11	6.886	4.16E-12	8.332	1.54E-11	8.380	9.26E-12	8.425	2.72E-12
8.704	6.95E-12	8.750	2.60E-11	8.797	1.62E-13	7.033	4.46E-11	7.079	1.08E-10	7.135	5.49E-12	8.612	1.58E-11	8.658	1.59E-11	8.705	5.60E-13
8.991	8.31E-12	9.036	3.10E-11	9.082	5.64E-13	7.279	5.01E-11	7.324	1.32E-10	7.386	4.94E-13	8.898	1.96E-11	8.946	8.68E-12	8.992	3.97E-13
9.271	1.70E-11	9.317	2.24E-11	9.362	6.27E-13	7.522	9.01E-11	7.568	1.68E-10	7.613	5.92E-12	9.177	2.06E-11	9.224	2.60E-11	9.270	1.97E-12
9.571	2.38E-11	9.617	4.49E-11	9.662	5.43E-13	7.763	1.06E-10	7.808	1.95E-10	7.854	4.06E-12	9.451	4.61E-11	9.497	2.52E-11	9.543	2.41E-13
9.845	3.13E-11	9.890	5.19E-11	9.939	2.38E-13	7.993	1.22E-10	8.039	2.30E-10	8.084	7.45E-12	9.733	4.37E-11	9.779	4.67E-11	9.824	3.14E-13
10.14	4.16E-11	10.18	6.18E-11	10.23	3.81E-13	8.224	2.01E-10	8.270	2.51E-10	8.315	7.76E-12	10.02	5.86E-11	10.06	5.36E-11	10.11	2.00E-13
10.41	5.53E-11	10.46	5.89E-11	10.50	3.30E-13	8.458	1.66E-10	8.504	3.11E-10	8.549	6.87E-12	10.32	7.87E-11	10.36	6.37E-11	10.41	7.55E-13
10.68	5.27E-11	10.73	6.80E-11	10.77	5.12E-13	8.686	1.86E-10	8.731	3.22E-10	8.776	4.72E-12	10.59	1.29E-10	10.64	6.75E-11	10.68	1.64E-12
10.96	9.52E-11	11.01	8.95E-11	11.05	2.04E-12	8.913	2.07E-10	8.958	3.37E-10	9.004	1.64E-11	10.88	1.57E-10	10.92	1.02E-10	10.97	9.08E-13
11.24	8.59E-11	11.28	9.23E-11	11.33	2.53E-13	9.141	1.86E-10	9.187	3.17E-10	9.232	9.77E-13	11.15	1.99E-10	11.19	1.29E-10	11.24	1.34E-12
11.52	1.50E-10	11.57	1.34E-10	11.61	2.14E-13	9.371	1.21E-10	9.417	2.41E-10	9.462	9.33E-12	11.43	2.32E-10	11.47	1.25E-10	11.52	2.87E-13
11.79	2.26E-10	11.84	1.60E-10	11.89	8.74E-13	9.614	9.34E-11	9.660	1.63E-10	9.705	8.36E-12	11.71	2.37E-10	11.76	1.24E-10	11.80	3.54E-12
12.07	2.43E-10	12.12	1.44E-10	12.16	4.69E-13	9.843	7.27E-11	9.889	1.13E-10	9.934	1.67E-11	12.01	1.55E-10	12.05	9.11E-11	12.10	1.55E-13
12.35	2.73E-10	12.40	1.95E-10	12.44	3.34E-13	10.07	8.60E-11	10.12	7.49E-11	10.17	2.62E-11	12.28	1.17E-10	12.32	9.67E-11	12.37	2.55E-13
12.63	3.14E-10	12.68	1.54E-10	12.73	4.46E-13	10.31	1.11E-10	10.36	7.53E-11	10.40	4.62E-11	12.55	7.81E-11	12.60	4.87E-11	12.64	6.08E-13
12.92	3.07E-10	12.97	1.77E-10	13.01	1.73E-13	10.54	1.09E-10	10.58	5.62E-11	10.63	3.68E-11	12.85	5.86E-11	12.89	6.71E-11	12.94	1.01E-12
13.20	2.82E-10	13.25	1.40E-10	13.29	3.30E-13	10.77	1.95E-10	10.81	5.87E-11	10.86	7.65E-11	13.13	6.70E-11	13.17	6.77E-11	13.22	5.66E-13
13.48	1.39E-10	13.53	1.25E-10	13.57	5.38E-13	10.99	2.35E-10	11.04	5.32E-11	11.09	7.87E-11	13.40	4.08E-11	13.45	5.54E-11	13.49	4.85E-13
13.76	8.48E-11	13.81	7.33E-11	13.85	3.04E-13	11.23	2.57E-10	11.28	5.82E-11	11.32	1.03E-10	13.69	4.11E-11	13.73	3.55E-11	13.78	7.64E-13
14.04	6.40E-11	14.08	5.51E-11	14.13	2.67E-13	11.46	2.65E-10	11.51	5.31E-11	11.55	1.18E-10	13.97	5.15E-11	14.02	5.54E-11	14.06	2.03E-13
14.32	3.71E-11	14.37	7.33E-11	14.42	5.89E-13	11.70	3.03E-10	11.74	5.06E-11	11.79	1.19E-10	14.25	2.88E-11	14.29	4.25E-11	14.34	8.25E-13
14.61	4.50E-11	14.66	6.95E-11	14.71	2.12E-13	11.93	3.10E-10	11.98	4.86E-11	12.02	1.00E-10	14.53	2.47E-11	14.57	4.87E-11	14.62	5.06E-13
14.89	4.00E-11	14.93	6.02E-11	14.98	4.94E-13	12.17	2.58E-10	12.21	4.97E-11	12.26	1.23E-10	14.81	3.91E-11	14.86	3.78E-11	14.90	1.85E-12
15.16	4.51E-11	15.21	6.18E-11	15.25	2.62E-13	12.40	2.19E-10	12.45	4.98E-11	12.49	1.14E-10	15.09	2.49E-11	15.14	4.28E-11	15.18	3.49E-13
15.44	3.40E-11	15.49	4.00E-11	15.53	5.18E-13	12.64	1.12E-10	12.68	5.21E-11	12.73	9.88E-11	15.37	3.80E-11	15.42	3.56E-11	15.46	2.36E-13
15.73	3.55E-11	15.77	4.40E-11	15.82	6.06E-13	12.88	9.78E-11	12.93	4.29E-11	12.97	7.28E-11	15.65	3.43E-11	15.69	4.06E-11	15.74	4.94E-13
16.00	3.94E-11	16.05	5.10E-11	16.09	3.06E-12	13.11	9.61E-11	13.15	5.56E-11	13.20	6.44E-11	15.94	3.33E-11	15.98	5.37E-11	16.03	1.81E-12
16.28	4.10E-11	16.32	3.31E-11	16.37	5.37E-13	13.33	7.43E-11	13.38	4.67E-11	13.43	4.99E-11	16.22	2.94E-11	16.26	4.45E-11	16.31	6.27E-13
16.56	2.23E-11	16.60	3.31E-11	16.65	6.59E-13	13.57	6.17E-11	13.62	5.17E-11	13.66	5.47E-11	16.51	2.95E-11	16.55	2.46E-11	16.59	3.90E-13
16.84	2.59E-11	16.89	4.36E-11	16.93	2.02E-13	13.80	5.51E-11	13.85	4.57E-11	13.89	5.27E-11	16.79	2.01E-11	16.83	5.46E-11	16.88	5.19E-13
17.11	2.24E-11	17.16	5.69E-11	17.21	3.81E-13	14.03	7.36E-11	14.08	4.96E-11	14.12	4.07E-11	17.08	2.08E-11	17.13	3.74E-11	17.18	4.14E-12
17.40	2.66E-11	17.45	3.84E-11	17.49	2.00E-12	14.26	3.49E-11	14.31	4.44E-11	14.35	4.50E-11	17.36	3.36E-11	17.41	2.80E-11	17.45	1.43E-12
17.68	1.88E-11	17.73	4.28E-11	17.77	2.10E-13	14.49	3.98E-11	14.54	4.77E-11	14.59	4.60E-11	17.65	2.65E-11	17.70	3.63E-11	17.74	3.13E-13
17.95	2.39E-11	18.00	2.54E-11	18.04	3.56E-13	14.72	5.23E-11	14.77	4.70E-11	14.81	4.01E-11	17.94	2.53E-11	17.98	2.21E-11	18.03	4.54E-13
18.23	3.65E-11	18.27	2.77E-11	18.32	7.71E-13	14.95	3.43E-11	15.00	5.15E-11	15.04	5.14E-11	18.23	2.46E-11	18.27	3.63E-11	18.32	7.48E-13
18.51	1.00E-11	18.56	3.49E-11	18.60	4.65E-13	15.18	6.08E-11	15.22	4.73E-11	15.27	3.05E-11	18.51	2.73E-11	18.55	4.44E-11	18.60	5.39E-13
18.79	8.81E-12	18.84	4.72E-11	18.89	2.57E-13	15.41	3.24E-11	15.45	4.21E-11	15.50	3.64E-11	18.79	3.16E-11	18.84	3.67E-11	18.89	3.29E-13
19.08	1.87E-11	19.12	9.92E-12	19.17	3.42E-12	15.65	5.43E-11	15.69	5.03E-11	15.74	5.36E-11	19.08	9.57E-12	19.12	1.01E-11	19.17	2.88E-13
19.35	1.61E-11	19.40	4.20E-11	19.45	7.02E-13	15.87	3.97E-11	15.92	4.46E-11	15.97	4.13E-11	19.35	1.77E-11	19.40	1.17E-11	19.45	4.56E-13
19.63	2.28E-11	19.67	4.71E-11	19.72	8.28E-13	16.10	4.75E-11	16.15	4.89E-11	16.19	3.56E-11	19.64	2.22E-11	19.68	1.21E-11	19.73	7.20E-13
19.91	2.69E-11	19.96	3.10E-11	20.01	5.79E-13	16.34	3.61E-11	16.38	4.58E-11	16.43	4.31E-11	19.92	1.88E-11	19.96	2.78E-11	20.01	5.90E-13
20.20	2.78E-11	20.24	4.25E-11	20.29	2.94E-12	16.58	3.59E-11	16.63	4.66E-11	16.68	4.69E-11	20.19	2.91E-11	20.24	1.68E-11	20.29	6.19E-13
20.48	6.31E-12	20.52	3.12E-11	20.57	5.57E-13	16.81	3.70E-11	16.86	4.60E-11	16.90	2.78E-11	20.47	2.57E-11	20.51	2.84E-11	20.56	2.92E-13
20.77	9.53E-12	20.82	3.72E-11	20.86	5.44E-13	17.05	2.39E-11	17.09	4.64E-11	17.14	4.80E-11	20.75	2.10E-11	20.79	3.94E-11	20.84	2.36E-12
21.05	1.03E-11	21.09	3.30E-11	21.14	1.20E-13	17.28	3.38E-11	17.32	4.37E-11	17.37	3.65E-11	21.03	1.95E-11	21.08	1.76E-11	21.12	4.81E-13
21.32	1.06E-11	21.37	2.46E-11	21.41	5.94E-13	17.51	3.98E-11	17.55	4.66E-11	17.60	4.19E-11	21.31	3.33E-11	21.36	8.89E-12	21.41	2.69E-12
21.60	1.30E-11	21.65	2.27E-11	21.70	5.41E-13	17.75	3.05E-11	17.80	4.00E-11	17.84	2.65E-11	21.60	1.39E-11	21.65	9.60E-12	21.69	9.11E-13
21.88	1.92E-11	21.92	2.21E-11	21.97	3.52E-13	17.98	2.69E-11	18.02	4.54E-11	18.07	2.77E-11	21.87	1.30E-11	21.92	3.04E-11	21.97	2.31E-13
22.16	7.41E-12	22.21	2.56E-11	22.25	1.25E-12	18.21	4.33E-11	18.25	4.04E-11	18.30	2.58E-11	22.15	7.99E-12	22.20	1.47E-11	22.25	2.64E-12
22.44	9.35E-12	22.49	3.80E-11	22.54	2.35E-12	18.44	2.19E-11	18.48	3.90E-11	18.53	3.15E-11	22.43	9.29E-12	22.48	8.58E-12	22.52	5.89E-13
22.72	1.26E-11	22.77	2.47E-11	22.81	1.80E-13	18.67	3.69E-11	18.71	3.75E-11	18.76	2.31E-11	22.72	9.84E-12	22.77	9.49E-12	22.81	7.78E-13
23.00	1.28E-11	23.05	2.53E-11	23.09	5.97E-12	18.90	3.96E-11	18.94	4.31E-11	18.99	8.23E-12	23.01	2.06E-11	23.06	1.32E-11	23.11	2.18E-12
23.28	6.36E-12	23.33	2.92E-11	23.37	3.55E-12	19.13	3.45E-11	19.18	4.59E-11	19.22	8.24E-12	23.29	1.54E-11	23.33	2.12E-11	23.38	7.65E-13
23.56	4.92E-12	23.61	9.86E-12	23.66	2.50E-12	19.37	5.88E-11	19.42	4.09E-11	19.46	1.57E-11	23.57	8.31E-12	23.62	2.03E-11	23.67	5.75E-13
23.84	1.59E-11	23.89	1.98E-11	23.94	5.91E-13	19.60	2.81E-11	19.65	4.42E-11	19.69	2.93E-11	23.85	1.79E-11	23.89	9.50E-12	23.94	1.57E-12
24.12	1.20E-11	24.17	8.98E-12	24.21	4.95E-12	19.85	2.83E-11	19.89	4.72E-11	19.94	3.95E-11	24.13	1.39E-11	24.17	1.54E-11	24.22	3.63E-13
24.41	1.41E-11	24.45	1.42E-11	24.50	3.62E-13	20.08	4.10E-11	20.12	4.44E-11	20.17	9.24E-12	24.42	8.89E-12	24.46	1.62E-11	24.51	6.56E-13
24.69	8.42E-12	24.73	3.10E-11	24.78	4.78E-13	20.30	5.24E-11	20.35	3.81E-11	20.40	2.31E-11	24.69	1.35E-11	24.74	2.14E-11	24.79	3.18E-12
24.97	1.30E-11	25.02	2.18E-11	25.07	4.47E-12	20.53	3.52E-11	20.58	4.87E-11	20.62	8.09E-12	24.98	1.11E-11	25.02	1.93E-11	25.07	3.21E-12
25.26	3.44E-12	25.31	2.80E-11	25.35	7.47E-13	20.76	2.88E-11	20.81	4.27E-11	20.85	1.55E-11	25.26	1.11E-11	25.31	1.83E-11	25.36	1.32E-12
25.54	1.47E-11	25.58	1.43E-11	25.64	3.99E-13	20.99	3.65E-11	21.04	4.86E-11	21.08	1.01E-12	25.54	7.20E-12	25.59	9.10E-12	25.64	5.83E-13
25.82	1.93E-11	25.87	9.99E-12	25.92	4.38E-12	21.22	3.39E-11	21.27	4.01E-11	21.32	2.77E-11	25.83	2.06E-11	25.88	1.19E-11	25.92	5.69E-13
26.11	2.01E-11	26.15	2.49E-11	26.20	8.16E-13	21.47	3.69E-11	21.51	4.12E-11	21.56	2.60E-11	26.12	2.85E-11	26.17	4.75E-12	26.22	5.99E-13
26.38	4.62E-12	26.43	8.75E-12	26.47	3.17E-12	21.70	4.42E-11	21.74	4.19E-11	21.79	2.24E-11	26.41	9.83E-12	26.46	6.11E-12	26.50	5.51E-13
26.66	9.14E-12	26.70	2.61E-11	26.75	6.94E-13	21.93	3.71E-11	21.97	4.30E-11	22.02	2.37E-11	26.69	1.83E-11	26.74	1.16E-11	26.79	4.59E-12
26.94	4.01E-12	26.99	2.21E-11	27.03	6.87E-12	22.15	4.56E-11	22.20	4.49E-11	22.24	3.50E-11	26.98	1.83E-11	27.02	9.11E-12	27.07	1.82E-12
27.22	1.25E-11	27.27	9.78E-12	27.32	8.41E-13	22.39	5.20E-11	22.43	4.85E-11	22.48	1.30E-11	27.26	1.79E-11	27.31	4.48E-12	27.35	5.72E-12
27.50	5.92E-12	27.54	1.33E-11	27.59	7.22E-12	22.62	3.52E-11	22.66	4.54E-11	22.71	1.32E-11	27.55	7.98E-12	27.59	8.71E-13	27.64	1.81E-12
27.79	6.12E-12	27.84	2.02E-11	27.89	5.24E-12	22.85	3.79E-11	22.90	4.16E-11	22.95	1.42E-11	27.83	2.23E-12	27.88	8.13E-12	27.92	2.89E-12
28.07	7.45E-12	28.12	1.37E-11	28.17	5.34E-12	23.08	6.35E-11	23.13	4.65E-11	23.17	1.60E-11	28.12	1.94E-11	28.17	8.81E-12	28.21	6.04E-12
28.35	1.22E-11	28.40	2.05E-11	28.45	4.11E-12	23.31	4.21E-11	23.36	4.10E-11	23.40	1.69E-11	28.40	1.07E-11	28.45	9.02E-12	28.51	5.55E-12
28.64	6.48E-12	28.69	1.02E-11	28.73	7.28E-13	23.54	4.10E-11	23.59	4.26E-11	23.63	1.28E-11	28.70	1.21E-11	28.75	9.09E-12	28.79	9.51E-13
28.92	5.68E-12	28.97	9.96E-12	29.01	7.58E-12	23.78	3.56E-11	23.82	4.29E-11	23.87	1.72E-11	28.97	1.41E-11	29.02	9.29E-12	29.07	2.99E-12
29.21	1.49E-11	29.25	2.56E-11	29.30	9.99E-13	24.01	4.44E-11	24.05	4.39E-11	24.10	6.26E-12	29.26	1.44E-11	29.30	6.05E-12	29.35	6.28E-13
29.49	8.41E-12	29.54	1.26E-11	29.58	2.69E-12	24.24	3.74E-11	24.28	4.55E-11	24.33	3.83E-12	29.54	9.78E-12	29.58	1.31E-11	29.63	7.44E-13
29.77	6.37E-12	29.81	2.59E-11	29.86	7.44E-12	24.46	3.71E-11	24.51	4.04E-11	24.56	1.84E-11	29.82	1.73E-11	29.87	1.92E-11	29.91	9.30E-13
30.06	7.54E-12	30.11	3.85E-11	30.15	7.99E-13	24.69	4.83E-11	24.74	4.35E-11	24.78	8.11E-12	30.10	1.66E-11	30.15	2.59E-11	30.20	6.72E-12
30.35	5.49E-12	30.40	1.86E-11	30.44	2.39E-12	24.92	3.11E-11	24.97	4.59E-11	25.01	1.75E-11	30.39	1.06E-11	30.44	8.32E-12	30.48	8.87E-13
30.63	6.30E-12	30.67	9.01E-12	30.72	5.52E-12	25.16	4.99E-11	25.20	4.54E-11	25.25	8.89E-12	30.68	1.03E-11	30.72	1.73E-11	30.77	4.87E-12
30.91	6.60E-12	30.95	8.45E-12	31.00	7.24E-13	25.39	5.77E-11	25.43	3.94E-11	25.48	5.38E-12	30.96	1.35E-11	31.01	9.86E-12	31.06	9.22E-12
31.19	5.10E-12	31.23	1.63E-11	31.28	3.96E-12	25.62	4.37E-11	25.66	3.84E-11	25.71	7.51E-12	31.24	1.69E-11	31.29	7.45E-12	31.33	1.86E-12
31.48	5.65E-12	31.53	2.36E-11	31.57	3.51E-13	25.85	4.30E-11	25.89	4.06E-11	25.94	9.26E-12	31.53	1.19E-11	31.57	5.68E-12	31.62	6.81E-12
31.76	4.66E-12	31.81	1.82E-11	31.85	4.00E-12	26.08	3.54E-11	26.12	4.32E-11	26.17	7.52E-12	31.80	8.54E-12	31.85	1.09E-11	31.90	5.34E-12
32.04	6.11E-12	32.09	1.46E-11	32.14	2.34E-12	26.31	4.26E-11	26.35	4.11E-11	26.40	9.27E-12	32.08	1.63E-11	32.12	6.35E-12	32.17	6.73E-12
32.34	9.80E-12	32.38	9.47E-12	32.43	2.69E-12	26.54	9.75E-12	26.58	4.43E-11	26.63	9.28E-12	32.35	1.95E-11	32.40	8.12E-12	32.44	2.02E-12
32.61	7.07E-12	32.66	6.58E-12	32.71	6.87E-13	26.78	3.15E-11	26.83	3.90E-11	26.87	1.55E-11	32.64	1.53E-11	32.69	6.30E-12	32.74	8.13E-13
32.89	6.61E-12	32.94	6.76E-12	32.98	6.60E-12	27.01	3.49E-11	27.05	4.51E-11	27.10	6.21E-12	32.92	1.41E-11	32.97	6.30E-12	33.01	8.19E-12
33.18	1.70E-12	33.23	7.91E-12	33.28	5.51E-12	27.24	3.46E-11	27.29	3.76E-11	27.33	9.75E-12	33.21	9.62E-12	33.26	1.52E-11	33.30	5.23E-12
33.48	2.38E-12	33.53	2.33E-11	33.57	8.17E-13	27.47	2.66E-11	27.51	3.86E-11	27.56	9.63E-12	33.49	1.82E-11	33.54	1.12E-11	33.58	2.07E-11
33.76	8.12E-12	33.80	8.27E-12	33.85	3.06E-12	27.69	4.45E-11	27.74	4.16E-11	27.79	5.84E-12	33.79	6.75E-12	33.83	6.65E-12	33.88	6.19E-12
34.04	3.05E-12	34.08	9.71E-13	34.13	8.43E-13	27.92	4.08E-11	27.97	3.90E-11	28.01	1.75E-11	34.07	1.88E-11	34.11	1.30E-11	34.16	5.55E-12
34.33	6.86E-12	34.37	1.77E-11	34.42	6.90E-13	28.15	3.91E-11	28.19	4.19E-11	28.24	1.34E-11	34.35	6.72E-12	34.40	2.10E-11	34.44	5.00E-12
34.60	6.27E-12	34.65	8.97E-12	34.69	7.90E-13	28.38	3.66E-11	28.42	4.27E-11	28.47	2.45E-11	34.64	1.28E-11	34.68	8.62E-12	34.73	2.34E-11
34.88	9.27E-12	34.93	1.23E-11	34.98	4.89E-13	28.62	3.35E-11	28.67	3.83E-11	28.71	6.91E-12	34.92	2.18E-11	34.96	6.49E-12	35.01	2.18E-11
35.17	5.23E-12	35.22	5.54E-12	35.26	2.10E-12	28.85	3.22E-11	28.90	4.55E-11	28.94	2.05E-11	35.19	7.84E-12	35.24	6.19E-12	35.29	7.63E-13
35.46	4.85E-12	35.51	1.67E-11	35.55	2.21E-12	29.08	3.51E-11	29.13	4.62E-11	29.17	1.01E-12	35.49	1.39E-11	35.53	7.68E-12	35.58	8.87E-12
35.74	1.26E-11	35.79	8.87E-13	35.83	9.76E-14	29.31	2.18E-11	29.36	3.89E-11	29.41	7.75E-12	35.76	1.14E-11	35.81	8.98E-13	35.85	6.87E-12
36.03	8.02E-12	36.07	7.91E-12	36.12	2.62E-12	29.54	2.58E-11	29.59	4.63E-11	29.63	6.87E-12	36.05	9.74E-12	36.09	3.58E-12	36.14	1.46E-11
36.31	1.33E-11	36.35	1.62E-11	36.40	3.93E-12	29.77	2.74E-11	29.81	4.09E-11	29.86	9.76E-12	36.34	1.10E-11	36.39	1.44E-11	36.43	1.46E-11
36.58	5.76E-12	36.63	1.23E-11	36.67	4.95E-13	30.00	3.27E-11	30.04	3.95E-11	30.09	9.39E-13	36.61	9.93E-12	36.66	6.07E-12	36.70	9.34E-12
36.87	5.52E-12	36.91	2.25E-11	36.96	2.24E-13	30.23	3.96E-11	30.27	3.58E-11	30.32	8.71E-12	36.90	7.19E-12	36.94	4.45E-12	36.99	8.24E-12
37.14	4.79E-12	37.19	9.12E-13	37.23	8.53E-13	30.45	3.20E-11	30.50	4.61E-11	30.55	9.10E-12	37.18	7.07E-12	37.23	6.67E-12	37.28	1.00E-12
37.43	5.33E-12	37.48	1.04E-11	37.52	1.98E-12	30.68	3.79E-11	30.73	4.35E-11	30.77	9.45E-12	37.47	1.74E-11	37.51	2.03E-11	37.56	6.27E-12
37.72	6.71E-12	37.77	6.43E-12	37.81	8.81E-13	30.92	3.26E-11	30.97	3.91E-11	31.01	3.45E-12	37.75	8.97E-12	37.80	6.66E-12	37.84	8.84E-12
38.00	5.14E-12	38.04	1.51E-11	38.09	4.75E-13	31.17	3.03E-11	31.21	4.01E-11	31.26	6.84E-12	38.03	2.44E-11	38.08	8.69E-12	38.12	2.24E-11
38.28	6.11E-12	38.32	7.12E-12	38.37	2.54E-13	31.40	3.12E-11	31.44	3.75E-11	31.49	2.08E-11	38.32	1.46E-11	38.37	6.58E-12	38.42	1.61E-11
38.57	4.79E-12	38.61	6.96E-12	38.66	3.05E-13	31.63	2.09E-11	31.67	4.23E-11	31.72	8.03E-12	38.61	1.63E-11	38.66	4.85E-12	38.70	6.64E-12
38.84	5.18E-12	38.89	5.28E-12	38.94	4.77E-13	31.87	1.97E-11	31.92	4.12E-11	31.96	6.11E-12	38.89	8.21E-12	38.94	7.78E-12	38.98	1.49E-11
39.14	5.20E-12	39.19	8.98E-12	39.24	7.05E-13	32.12	3.92E-11	32.16	3.95E-11	32.21	7.83E-12	39.17	8.15E-12	39.22	9.40E-12	39.27	7.80E-12
39.43	4.99E-12	39.47	1.26E-11	39.52	4.95E-13	32.35	4.26E-11	32.39	4.55E-11	32.44	1.84E-11	39.46	1.13E-11	39.51	2.39E-11	39.56	9.12E-12
39.71	1.40E-11	39.76	6.33E-12	39.80	3.69E-13	32.57	2.13E-11	32.62	3.89E-11	32.67	5.80E-12	39.74	2.27E-11	39.79	4.16E-12	39.83	7.55E-12
39.99	6.13E-12	40.03	1.23E-11	40.08	1.71E-12	32.81	2.56E-11	32.85	4.26E-11	32.90	1.73E-11	40.04	8.08E-12	40.08	4.33E-12	40.13	9.25E-12
40.26	8.73E-13	40.31	7.91E-12	40.36	1.10E-12	33.04	3.04E-11	33.08	4.66E-11	33.13	7.78E-12	40.32	8.44E-12	40.36	5.89E-12	40.41	5.75E-12
40.54	6.32E-12	40.59	5.66E-12	40.63	2.27E-13	33.27	2.06E-11	33.32	4.56E-11	33.36	9.14E-13	40.60	1.25E-11	40.64	3.53E-12	40.69	9.77E-12
40.83	7.50E-12	40.88	9.06E-12	40.92	1.37E-12	33.50	1.88E-11	33.55	3.89E-11	33.59	1.35E-11	40.89	2.68E-11	40.94	6.20E-12	40.99	3.67E-11
41.11	2.66E-12	41.15	5.89E-12	41.20	3.12E-13	33.74	1.67E-11	33.79	3.93E-11	33.83	5.58E-12	41.17	3.04E-11	41.22	1.34E-11	41.27	5.02E-11
41.39	6.54E-12	41.44	6.92E-12	41.48	7.83E-13	33.97	3.58E-11	34.01	4.10E-11	34.06	2.97E-12	41.46	4.06E-11	41.51	7.50E-12	41.55	6.61E-11
41.67	6.70E-12	41.72	1.46E-11	41.76	3.24E-12	34.19	2.94E-11	34.24	4.20E-11	34.29	8.09E-12	41.75	6.01E-11	41.80	5.12E-12	41.84	7.33E-11
41.95	9.79E-13	42.00	4.35E-12	42.04	7.12E-13	34.43	1.01E-11	34.48	4.43E-11	34.52	2.35E-12	42.03	7.72E-11	42.08	8.31E-12	42.12	8.02E-11
42.24	6.65E-12	42.29	1.01E-11	42.33	6.85E-13	34.66	3.11E-11	34.71	4.73E-11	34.75	5.05E-12	42.31	1.10E-10	42.36	1.33E-11	42.41	1.27E-10
42.51	8.75E-13	42.56	2.00E-11	42.61	4.58E-12	34.89	2.44E-11	34.94	3.71E-11	34.98	6.98E-12	42.59	1.09E-10	42.64	7.84E-12	42.68	1.33E-10
42.79	9.83E-13	42.84	9.37E-12	42.89	8.34E-13	35.12	2.19E-11	35.17	3.95E-11	35.21	1.88E-11	42.88	1.35E-10	42.93	7.37E-12	42.97	1.65E-10
43.07	5.59E-12	43.12	7.03E-12	43.17	2.18E-12	35.35	2.34E-11	35.40	4.33E-11	35.45	7.71E-12	43.17	1.36E-10	43.22	5.69E-12	43.26	1.77E-10
43.35	2.22E-12	43.40	5.56E-12	43.45	1.01E-12	35.59	3.32E-11	35.64	4.05E-11	35.68	7.31E-13	43.46	1.78E-10	43.51	9.19E-12	43.55	2.13E-10
43.63	6.40E-12	43.68	7.27E-12	43.73	6.14E-12	35.83	1.78E-11	35.87	3.96E-11	35.92	1.78E-11	43.74	1.71E-10	43.79	1.61E-11	43.83	2.53E-10
43.93	9.61E-13	43.97	2.25E-11	44.02	8.27E-12	36.06	1.66E-11	36.10	3.69E-11	36.15	7.39E-12	44.02	2.10E-10	44.07	9.69E-13	44.11	2.61E-10
44.22	3.28E-12	44.26	1.70E-11	44.31	2.61E-12	36.29	1.73E-11	36.33	3.89E-11	36.38	9.61E-13	44.30	2.35E-10	44.35	1.68E-11	44.40	2.59E-10
44.49	4.02E-12	44.54	1.94E-11	44.59	2.97E-12	36.52	2.59E-11	36.56	3.86E-11	36.61	5.82E-12	44.59	2.45E-10	44.64	9.42E-12	44.68	2.92E-10
44.78	5.41E-12	44.83	6.80E-12	44.87	4.74E-12	36.76	2.72E-11	36.81	3.90E-11	36.85	7.53E-12	44.88	2.26E-10	44.92	8.30E-12	44.97	3.38E-10
45.06	4.69E-12	45.11	9.30E-12	45.15	4.18E-12	36.99	2.10E-11	37.04	3.91E-11	37.08	8.15E-12	45.15	2.41E-10	45.20	5.89E-12	45.24	3.46E-10
45.35	4.92E-12	45.39	2.19E-11	45.44	5.63E-12	37.22	9.48E-12	37.27	3.42E-11	37.31	8.95E-13	45.44	2.55E-10	45.49	9.88E-12	45.53	3.85E-10
45.63	6.58E-12	45.68	3.74E-12	45.72	9.13E-13	37.45	1.18E-11	37.49	4.40E-11	37.54	8.55E-13	45.73	2.88E-10	45.77	4.47E-12	45.82	3.20E-10
45.92	4.11E-12	45.96	1.97E-11	46.01	8.54E-12	37.68	2.38E-11	37.72	3.47E-11	37.77	1.13E-11	46.00	2.55E-10	46.05	7.12E-12	46.09	3.95E-10
46.20	1.91E-12	46.24	1.45E-11	46.29	3.86E-12	37.92	2.50E-11	37.96	3.92E-11	38.01	9.86E-13	46.29	2.23E-10	46.34	1.29E-11	46.38	3.79E-10
46.48	9.82E-13	46.53	1.17E-11	46.57	5.63E-12	38.14	2.00E-11	38.19	3.50E-11	38.23	1.59E-11	46.57	2.07E-10	46.62	1.33E-11	46.67	3.37E-10
46.76	5.89E-12	46.81	7.51E-12	46.86	1.04E-11	38.38	9.03E-12	38.43	3.80E-11	38.47	1.31E-11	46.85	1.96E-10	46.89	6.81E-12	46.94	3.24E-10
47.04	4.70E-12	47.09	9.04E-12	47.13	1.00E-12	38.61	1.69E-11	38.66	4.34E-11	38.70	8.62E-12	47.14	1.57E-10	47.18	8.05E-12	47.23	2.61E-10
47.34	1.58E-12	47.38	1.13E-11	47.43	5.42E-13	38.85	9.70E-12	38.90	4.37E-11	38.95	1.48E-11	47.41	1.40E-10	47.46	8.21E-12	47.50	2.59E-10
47.63	6.08E-12	47.67	1.01E-11	47.72	5.11E-12	39.09	1.77E-11	39.13	3.92E-11	39.18	8.80E-12	47.70	1.20E-10	47.74	1.68E-11	47.79	2.12E-10
47.92	5.57E-12	47.96	8.05E-12	48.01	3.95E-12	39.31	1.37E-11	39.36	3.64E-11	39.41	8.68E-12	47.99	1.28E-10	48.03	6.95E-12	48.08	1.93E-10
48.21	6.09E-12	48.26	9.32E-12	48.30	3.61E-12	39.54	2.15E-11	39.59	4.33E-11	39.64	7.67E-12	48.28	8.68E-11	48.32	7.44E-12	48.37	1.35E-10
48.51	4.78E-12	48.55	1.48E-11	48.60	4.77E-12	39.78	1.63E-11	39.82	4.13E-11	39.87	5.01E-12	48.55	8.64E-11	48.60	8.52E-12	48.64	1.45E-10
48.78	6.24E-12	48.83	1.21E-11	48.87	4.84E-12	40.01	2.11E-11	40.05	4.31E-11	40.10	3.48E-12	48.82	6.38E-11	48.87	5.99E-12	48.92	1.20E-10
49.06	6.60E-12	49.11	9.65E-12	49.15	2.40E-12	40.24	2.58E-11	40.29	4.14E-11	40.33	1.15E-11	49.10	5.67E-11	49.14	1.28E-11	49.19	6.71E-11
49.35	5.92E-12	49.39	1.42E-11	49.44	3.24E-12	40.47	1.93E-11	40.52	3.53E-11	40.56	1.71E-12	49.38	5.79E-11	49.43	6.95E-12	49.48	7.07E-11
49.63	3.00E-12	49.68	1.82E-11	49.72	2.70E-12	40.70	1.44E-11	40.75	3.60E-11	40.79	6.26E-12	49.67	4.33E-11	49.72	5.25E-12	49.76	5.01E-11
49.91	4.13E-12	49.95	2.08E-11	50.00	5.97E-13	40.94	3.58E-11	40.98	3.37E-11	41.03	9.84E-12	49.94	3.83E-11	49.99	6.85E-12	50.04	3.97E-11
50.19	4.72E-12	50.24	8.78E-12	50.29	6.16E-13	41.17	2.24E-11	41.22	4.56E-11	41.26	2.28E-11	50.22	3.33E-11	50.27	7.00E-12	50.32	2.86E-11
50.48	9.05E-13	50.52	5.67E-12	50.57	5.86E-13	41.41	3.31E-11	41.46	4.15E-11	41.50	5.12E-12	50.52	2.00E-11	50.56	7.03E-12	50.61	1.40E-11
50.75	7.06E-12	50.80	2.23E-11	50.84	2.55E-12	41.64	4.09E-11	41.69	3.69E-11	41.73	5.32E-12	50.80	3.80E-11	50.85	6.81E-12	50.89	2.13E-11
51.03	8.11E-12	51.07	5.25E-12	51.12	4.34E-13	41.89	3.81E-11	41.94	3.42E-11	41.98	1.47E-11	51.08	3.08E-11	51.12	6.75E-12	51.17	1.02E-11
51.33	3.19E-12	51.38	6.47E-12	51.42	4.53E-12	42.12	4.39E-11	42.17	4.50E-11	42.21	4.21E-12	51.37	2.96E-11	51.42	1.71E-11	51.46	9.34E-12
51.61	1.34E-11	51.66	1.44E-11	51.70	3.46E-13	42.36	2.68E-11	42.41	4.17E-11	42.45	1.10E-11	51.65	2.01E-11	51.70	4.71E-12	51.74	9.94E-13
51.89	5.20E-12	51.93	9.57E-13	51.98	5.51E-13	42.60	1.83E-11	42.64	3.68E-11	42.69	5.78E-12	51.94	2.54E-11	51.99	6.13E-12	52.04	8.97E-12
52.16	6.17E-12	52.21	7.83E-12	52.26	4.25E-13	42.82	4.44E-11	42.87	4.06E-11	42.92	1.53E-11	52.22	6.86E-12	52.27	4.69E-12	52.32	8.19E-12
52.45	9.39E-12	52.50	6.41E-12	52.54	7.06E-13	43.06	2.76E-11	43.10	4.10E-11	43.15	9.48E-13	52.50	9.05E-12	52.55	2.17E-11	52.59	7.54E-12
52.75	2.13E-11	52.80	1.37E-11	52.85	6.13E-13	43.29	2.96E-11	43.34	4.22E-11	43.38	9.67E-12	52.78	2.77E-11	52.83	1.07E-11	52.88	7.28E-12
53.04	4.07E-12	53.08	1.27E-11	53.13	5.72E-13	43.52	3.89E-11	43.57	3.45E-11	43.61	1.35E-11	53.08	1.70E-11	53.12	8.60E-12	53.17	8.34E-13
53.32	4.30E-12	53.36	1.36E-11	53.41	6.82E-13	43.76	2.57E-11	43.81	4.12E-11	43.85	5.85E-12	53.35	1.35E-11	53.40	1.03E-11	53.44	5.86E-12
53.60	3.06E-12	53.65	1.49E-11	53.70	4.26E-13	43.99	2.40E-11	44.04	3.61E-11	44.08	6.33E-12	53.63	6.48E-12	53.67	6.85E-12	53.72	6.63E-12
53.89	3.40E-12	53.94	9.05E-12	53.99	6.24E-13	44.22	2.35E-11	44.27	4.33E-11	44.32	1.21E-11	53.90	1.78E-11	53.95	3.41E-12	53.99	5.60E-12
54.18	7.29E-12	54.23	5.92E-12	54.28	3.20E-12	44.46	9.40E-12	44.51	3.89E-11	44.55	6.49E-12	54.18	9.95E-12	54.23	1.10E-11	54.27	8.22E-12
54.47	8.20E-12	54.51	7.49E-12	54.56	6.75E-13	44.69	2.04E-11	44.74	3.94E-11	44.78	8.21E-12	54.46	8.14E-12	54.51	3.95E-12	54.55	5.41E-12
54.75	4.18E-12	54.79	1.07E-11	54.84	5.22E-13	44.93	1.94E-11	44.97	4.04E-11	45.02	6.93E-12	54.74	2.47E-11	54.78	1.07E-11	54.83	7.77E-12
55.03	7.87E-12	55.08	9.74E-12	55.13	4.93E-13	45.16	2.00E-11	45.20	3.89E-11	45.25	9.08E-13	55.03	8.46E-12	55.07	4.79E-12	55.12	1.33E-11
55.31	7.82E-12	55.36	9.94E-13	55.40	3.92E-12	45.39	1.62E-11	45.43	4.32E-11	45.48	9.13E-13	55.31	2.22E-11	55.35	7.13E-12	55.40	5.49E-12
55.59	1.81E-11	55.64	1.58E-11	55.68	2.96E-13	45.62	9.95E-12	45.66	3.90E-11	45.71	6.91E-12	55.59	1.06E-11	55.64	6.97E-12	55.69	4.17E-12
55.87	5.62E-12	55.92	6.36E-12	55.96	2.97E-13	45.86	7.06E-12	45.91	3.85E-11	45.95	7.89E-12	55.88	8.25E-12	55.92	7.99E-12	55.97	6.43E-13
56.16	2.21E-12	56.20	1.59E-11	56.25	1.97E-13	46.10	1.44E-11	46.15	3.73E-11	46.19	2.66E-12	56.16	2.27E-11	56.20	4.69E-12	56.25	4.58E-12
56.43	3.71E-12	56.48	9.16E-13	56.52	1.87E-12	46.34	1.13E-11	46.39	3.81E-11	46.43	2.57E-12	56.44	2.05E-11	56.49	1.35E-11	56.54	2.81E-12
56.71	6.80E-12	56.76	7.91E-12	56.80	3.25E-12	46.57	1.05E-11	46.61	4.51E-11	46.66	6.52E-12	56.72	1.18E-11	56.77	6.92E-12	56.81	5.96E-12
56.99	6.69E-12	57.03	7.95E-12	57.08	4.34E-13	46.80	7.86E-12	46.85	3.79E-11	46.90	8.15E-12	57.00	3.62E-11	57.04	5.15E-12	57.09	7.62E-13
57.27	5.24E-12	57.31	1.29E-11	57.36	2.64E-13	47.04	2.32E-11	47.08	4.13E-11	47.13	4.46E-12	57.28	1.97E-11	57.32	5.74E-12	57.37	4.23E-12
57.54	5.83E-12	57.59	6.06E-12	57.63	5.24E-13	47.27	7.80E-12	47.31	4.16E-11	47.36	5.05E-12	57.57	1.05E-11	57.61	5.44E-12	57.66	4.40E-12
57.83	6.22E-12	57.88	1.59E-11	57.93	8.51E-13	47.50	8.33E-12	47.55	3.64E-11	47.59	5.91E-12	57.85	1.78E-11	57.90	9.05E-12	57.94	9.09E-12
58.12	5.53E-12	58.17	1.42E-11	58.21	7.05E-13	47.73	1.21E-11	47.78	3.84E-11	47.82	1.19E-11	58.14	1.84E-11	58.18	7.24E-12	58.23	9.78E-13
58.40	8.85E-12	58.45	7.02E-12	58.49	2.61E-12	47.96	5.07E-12	48.01	3.91E-11	48.05	5.86E-12	58.43	8.54E-12	58.47	7.75E-12	58.52	7.84E-13
58.68	4.60E-12	58.72	7.92E-13	58.77	5.01E-13	48.19	1.32E-11	48.23	4.15E-11	48.28	7.56E-12	58.71	2.10E-11	58.76	9.25E-12	58.80	3.64E-12
58.96	8.26E-13	59.00	1.05E-11	59.05	2.52E-12	48.42	1.22E-11	48.46	3.89E-11	48.51	6.71E-12	58.99	8.32E-12	59.03	5.82E-12	59.08	9.60E-13
59.24	6.81E-12	59.29	5.78E-12	59.33	2.39E-13	48.65	7.04E-12	48.69	3.61E-11	48.74	5.67E-12	59.28	2.38E-11	59.32	2.23E-11	59.37	7.60E-12
59.51	1.01E-12	59.56	7.14E-12	59.61	3.69E-13	48.89	1.91E-11	48.94	4.37E-11	48.98	6.90E-12	59.55	1.64E-11	59.60	4.42E-12	59.65	5.98E-12
59.80	6.01E-12	59.85	1.17E-11	59.89	6.21E-13	49.13	1.86E-11	49.17	3.63E-11	49.22	4.47E-12	59.83	7.74E-12	59.87	1.25E-11	59.92	3.92E-12
60.09	1.01E-12	60.14	4.90E-12	60.19	7.01E-13	49.35	1.24E-11	49.40	3.31E-11	49.45	6.69E-12	60.12	9.64E-12	60.17	1.26E-11	60.21	6.84E-12
60.38	4.47E-12	60.43	1.08E-11	60.47	4.49E-13	49.58	1.75E-11	49.63	3.58E-11	49.68	4.28E-12
60.68	5.13E-12	60.72	8.34E-12	60.77	7.84E-12	49.82	6.98E-12	49.86	4.07E-11	49.91	6.40E-12
60.96	8.05E-13	61.01	1.03E-11	61.05	2.14E-12	50.05	8.55E-12	50.10	3.46E-11	50.14	1.09E-11
						50.28	7.36E-12	50.33	3.53E-11	50.37	6.08E-12
						50.51	9.54E-12	50.56	3.56E-11	50.60	9.48E-13
						50.76	7.75E-12	50.81	3.51E-11	50.85	1.04E-11
						50.99	5.99E-12	51.03	3.63E-11	51.08	3.54E-12
						51.23	8.64E-12	51.27	4.16E-11	51.32	7.09E-12
						51.46	9.11E-12	51.51	3.79E-11	51.55	7.79E-13
						51.69	5.08E-12	51.73	4.32E-11	51.78	1.46E-11
						51.92	1.74E-11	51.96	4.46E-11	52.01	4.22E-12
						52.15	6.48E-12	52.19	3.95E-11	52.24	3.81E-12
						52.39	5.98E-12	52.44	3.60E-11	52.48	5.28E-12
						52.63	8.39E-12	52.67	3.61E-11	52.72	9.75E-12
						52.86	1.17E-11	52.90	3.55E-11	52.95	2.27E-12
						53.09	8.45E-12	53.13	3.85E-11	53.18	1.17E-11
						53.32	5.96E-12	53.36	3.95E-11	53.41	6.01E-12
						53.55	1.03E-11	53.59	3.37E-11	53.64	1.89E-11
						53.77	6.68E-12	53.82	3.65E-11	53.86	1.56E-11
						54.00	1.18E-11	54.05	3.78E-11	54.09	9.41E-12
						54.23	4.06E-12	54.28	4.37E-11	54.32	6.10E-12
						54.46	8.54E-12	54.50	3.46E-11	54.55	6.50E-12
						54.69	5.89E-12	54.73	4.22E-11	54.78	2.59E-12
						54.92	6.87E-12	54.96	3.84E-11	55.01	5.81E-12
						55.15	1.12E-11	55.19	3.83E-11	55.24	8.51E-12
						55.38	8.92E-12	55.42	3.78E-11	55.47	7.00E-12
						55.62	7.28E-12	55.66	3.92E-11	55.71	5.66E-12
						55.85	9.80E-12	55.89	3.80E-11	55.94	9.47E-12
						56.08	1.56E-11	56.13	3.84E-11	56.17	6.24E-12
						56.31	1.35E-11	56.36	3.61E-11	56.41	1.11E-11
						56.54	8.99E-12	56.59	3.61E-11	56.64	1.03E-11
						56.79	5.43E-12	56.83	4.14E-11	56.88	8.47E-12
						57.03	2.39E-11	57.07	4.17E-11	57.12	9.47E-13
						57.26	1.36E-11	57.30	3.73E-11	57.35	1.38E-11
						57.49	7.12E-12	57.54	3.79E-11	57.58	5.49E-12
						57.72	7.15E-12	57.76	4.25E-11	57.81	8.33E-13
						57.94	7.93E-12	57.99	4.08E-11	58.04	8.20E-12
						58.17	8.56E-12	58.22	4.48E-11	58.26	1.52E-11
						58.41	1.43E-11	58.46	3.60E-11	58.50	7.88E-12
						58.65	5.62E-12	58.69	3.92E-11	58.74	8.96E-12
						58.88	8.20E-12	58.92	3.77E-11	58.97	5.09E-12
						59.10	9.04E-12	59.15	3.48E-11	59.19	1.49E-11
						59.35	8.93E-12	59.40	3.15E-11	59.44	7.20E-12
						59.58	7.32E-12	59.62	3.52E-11	59.67	1.21E-11
						59.81	7.04E-12	59.85	3.72E-11	59.90	6.52E-12
						60.04	6.94E-12	60.09	3.56E-11	60.13	7.09E-12
