# Supplementary material for: A new method to quantify particulate sodium and potassium salts (nitrate, chloride, and sulfate) by thermal desorption aerosol mass spectrometry
Source: Copernicus journal article supplement (doi:10.5194/amt-2021-228), 2021-08-26
Supplement: Supplementary file 1 [file amt-2021-228-supplement.zip › Fig 6.csv]

SN/SC_Solution	SN/SC_SeawaterParticle_mz30,36	SN/SC_SeawaterParticle_mz23	SN/SC_Solution_Error	SN/SC_AuthenticParticle_mz30,36	SN/SC_AuthenticParticle_mz23	SN/SC_AuthenticParticle_mz30,36_Error	SN/SC_AuthenticParticle_mz23_Error	SS/SC_Solution	SS/SC_SeawaterParticle_mz36,48	SS/SC_SeawaterParticle_mz23	SS/SC_AuthenticParticle_mz36,48	SS/SC_AuthenticParticle_mz23
0	0.019	0	0	0.67	0.32	0.11	0.054	0.027	0.019	0.031	1.2	1.3
0	0.026	0	0	0.80	0.36	0.13	0.060	0.027	0.023	0.041	1.4	1.1
0	0.021	0	0	0.83	0.40	0.14	0.067	0.027	0.022	0.017	1.5	1.1
0.34	0.34	0.12	0.082					0.58	0.62	0.54
0.34	0.41	0.16	0.082					0.58	0.63	0.56
0.34	0.39	0.18	0.082					0.58	0.72	0.52
0.83	0.70	0.34	0.082					1.1	1.1	1.3
0.83	0.70	0.30	0.082					1.1	1.2	1.2
0.83	0.70	0.30	0.082					1.1	1.2	1.3
1.3	1.2	0.49	0.082					1.7	2.0	1.6
1.3	1.2	0.53	0.082					1.7	1.9	1.7
1.3	1.2	0.48	0.082					1.7	2.0	1.6
